# Supplementary material for: Efficacy of low-load blood flow restricted resistance EXercise in patients with Knee osteoarthritis scheduled for total knee replacement (EXKnee): protocol for a multicentre randomised controlled trial
Source: PubMed Central journal article supplement — BMJ Open. 2020 Oct 1;10(10):e034376. doi: 10.1136/bmjopen-2019-034376 (PMC7534706; doi:10.1136/bmjopen-2019-034376), 2020-10-01
Supplement: bmjopen-2019-034376.draft_revisions.pdf [file bmjopen-2019-034376.draft_revisions.pdf]

# BMJ Open

BMJ Open is committed to open peer review. As part of this commitment we make the peer review history of every article we publish publicly available.

When an article is published we post the peer reviewers' comments and the authors' responses online. We also post the versions of the paper that were used during peer review. These are the versions that the peer review comments apply to.

The versions of the paper that follow are the versions that were submitted during the peer review process. They are not the versions of record or the final published versions. They should not be cited or distributed as the published version of this manuscript.

BMJ Open is an open access journal and the full, final, typeset and author-corrected version of record of the manuscript is available on our site with no access controls, subscription charges or pay-per-view fees (<http://bmjopen.bmj.com>).

If you have any questions on BMJ Open's open peer review process please email [info.bmjopen@bmj.com](mailto:info.bmjopen@bmj.com)

# BMJ Open

**The efficacy of low-load blood flow restricted resistance EXercise in patients with Knee osteoarthritis scheduled for total knee replacement (EXKnee). A multicenter, randomized controlled trial.**

|                               |                                                                                                                                                                                                                                                                                                                                                                                                           |
|-------------------------------|-----------------------------------------------------------------------------------------------------------------------------------------------------------------------------------------------------------------------------------------------------------------------------------------------------------------------------------------------------------------------------------------------------------|
| Journal:                      | <i>BMJ Open</i>                                                                                                                                                                                                                                                                                                                                                                                           |
| Manuscript ID                 | bmjopen-2019-034376                                                                                                                                                                                                                                                                                                                                                                                       |
| Article Type:                 | Protocol                                                                                                                                                                                                                                                                                                                                                                                                  |
| Date Submitted by the Author: | 17-Sep-2019                                                                                                                                                                                                                                                                                                                                                                                               |
| Complete List of Authors:     | Jørgensen, Stian; Regional Hospital Horsens, Department of occupational and physical therapy; Horsens Sygehus, H-HIP Aagaard, Per; Institute for Sports Science and Clinical Biomechanics, University of Southern Denmark, Bohn, Marie; Horsens Sygehus, Department of Orthopedic Surgery Mechlenburg, Inger; Aarhus University Hospital, Department of Orthopedics; Aarhus University, Clinical Medicine |
| Keywords:                     | blood flow restriction exercise, knee osteoarthritis, total knee replacement surgery, preconditioning, functional capacity                                                                                                                                                                                                                                                                                |
|                               |                                                                                                                                                                                                                                                                                                                                                                                                           |

SCHOLARONE™  
Manuscripts

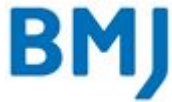

I, the Submitting Author has the right to grant and does grant on behalf of all authors of the Work (as defined in the below author licence), an exclusive licence and/or a non-exclusive licence for contributions from authors who are: i) UK Crown employees; ii) where BMJ has agreed a CC-BY licence shall apply, and/or iii) in accordance with the terms applicable for US Federal Government officers or employees acting as part of their official duties; on a worldwide, perpetual, irrevocable, royalty-free basis to BMJ Publishing Group Ltd ("BMJ") its licensees and where the relevant Journal is co-owned by BMJ to the co-owners of the Journal, to publish the Work in this journal and any other BMJ products and to exploit all rights, as set out in our [licence](#).

The Submitting Author accepts and understands that any supply made under these terms is made by BMJ to the Submitting Author unless you are acting as an employee on behalf of your employer or a postgraduate student of an affiliated institution which is paying any applicable article publishing charge ("APC") for Open Access articles. Where the Submitting Author wishes to make the Work available on an Open Access basis (and intends to pay the relevant APC), the terms of reuse of such Open Access shall be governed by a Creative Commons licence – details of these licences and which [Creative Commons](#) licence will apply to this Work are set out in our licence referred to above.

Other than as permitted in any relevant BMJ Author's Self Archiving Policies, I confirm this Work has not been accepted for publication elsewhere, is not being considered for publication elsewhere and does not duplicate material already published. I confirm all authors consent to publication of this Work and authorise the granting of this licence.

1  
2  
3  
4 **The efficacy of low-load blood flow restricted resistance EXercise in patients with Knee**  
5 **osteoarthritis scheduled for total knee replacement (EXKnee). A multicenter, randomized**  
6 **controlled trial.**  
7  
8  
9

10  
11 *Stian Langgård Jørgensen*<sup>1,2,5</sup>, *Marie Bagger Bohn*<sup>2</sup>, *Per Aagaard*<sup>3</sup>, *Inger Mechlenburg*<sup>4,5</sup>  
12  
13

14  
15  
16 <sup>1</sup>Department of Occupational and Physical Therapy. Regional Hospital Horsens, Denmark

17 <sup>2</sup>H-HIP, Department of Orthopedic Surgery, Regional Hospital Horsens, Denmark

18 <sup>3</sup>Department of Sports Science and Clinical Biomechanics, University of Southern Denmark

19 <sup>4</sup> Department of Orthopedic Surgery , Aarhus University Hospital, Denmark

20 <sup>5</sup>Department of clinical Medicine, Aarhus University, Denmark  
21  
22  
23  
24  
25  
26  
27

28 Corresponding Author:

29 Name: PhD student Stian Langgård Jørgensen

30 Address: Regional Hospital Horsens, Sundvej 30C, DK-8700 Horsens

31 E-mail: [stiajo@rm.dk](mailto:stiajo@rm.dk)  
32  
33

34 Phone: +45 22 71 17 82  
35  
36  
37  
38  
39  
40

41 Word count: 2.648  
42  
43  
44  
45  
46  
47  
48  
49  
50  
51  
52  
53  
54  
55  
56  
57  
58  
59  
60

## ABSTRACT

### Introduction

Up to 20% of patients undergoing total knee replacement (TKR) surgery report no or suboptimal pain relief after TKR. Moreover, despite chances of recovering to preoperative functional levels, patients receiving TKR have demonstrated persistent deficits in quadriceps strength and functional performance compared to healthy aged-matched adults. We intend to examine if low-load blood flow restricted exercise (BFRE) is an effective preoperative method to increase functional capacity, lower limb muscle strength and self-reported outcomes after TKR. In addition we seek to investigate to which extent preoperative BFRE will protect against surgery-related atrophy 3 months after TKR. Specifically, the primary aim of this trial is to examine the efficacy 8 weeks of low-load BFRE prior to a scheduled TKR on changes in 30-seconds Chair stand test from baseline to 3 months after TKR. As a secondary aim, the effect of preoperative BFRE on maximal knee extensor strength (MVC), functional capacity, patient-reported outcome (Knee Injury and Osteoarthritis Outcome Score) and selected myofiber properties (fiber CSA, myogenic stem cell content, myonuclei density) also will be examined also.

### Method and analysis

The trial is a multicenter, randomized controlled and assessor blinded trial, where patients scheduled for TKR will be randomized to either 8 weeks of preoperative BFRE or serve as a control group following usual care before TKR. Data will be collected at baseline, in the week of TKR, 6 weeks (questionnaires only), 3 months, and 12 months after TKR.

### Ethical approval and dissemination

The trial has been accepted by Central Denmark Region Committee on Biomedical Research Ethics (Journal No 10-72-19-19) and by The Danish Data Protection Agency (Journal No 652164). All results from the trial will be published in international peer-reviewed scientific journals regardless of whether the results are positive, negative or inconclusive.

### Trial registration

The trial is registered at Clinical Trial (NCT04081493)

### Article Summary

#### Strengths and limitations of this study

- The trial is a multicenter, randomized controlled assessor blinded trial.
- This is the first clinical trial to investigate the effect of low-load ischemic resistance training as a preconditioning method prior to elective knee replacement surgery.
- Patients will not be blinded to their allocation into intervention groups (BFR vs. control)

### Key words

Blood flow restricted exercise, knee osteoarthritis, total knee replacement surgery, preconditioning

## INTRODUCTION

Knee OA is a degenerative joint disease associated with pain, reduced physical activity, and quality of life affecting almost 40% of all individuals  $\geq 60$  years of age<sup>1-5</sup>. Approaching end-stage knee OA, total knee replacement (TKR) is often the preferred treatment choice to reduce pain and regain functional capacity. However, despite TKR patients typically demonstrate long-lasting deficits in quadriceps strength and functional performance<sup>2, 4</sup>. This failure to return to “normal” strength levels has been suggested to be associated with preoperatively lower limb muscle strength and function<sup>2</sup>.

Preconditioning exercise, designed to prepare the musculoskeletal system to better tolerate the stressful events such as the impact of invasive surgery has been suggested to be applicable prior to elective TKR<sup>6</sup>. Muscle atrophy is known to occur postoperatively, which may explain the marked functional deficits reported to persist for years<sup>6, 7</sup>. Previous research on exercise-based intervention prior to TKR has demonstrated mixed results<sup>6-12</sup>, as a likely result of insufficient exercise intensity, training volume, and/or lack of effective progression strategies<sup>9</sup>. Heavy-resistance strength training (HRST) is an often-used method for improving, skeletal muscle strength, hypertrophy and functional capacity in healthy and clinical populations<sup>4, 7, 12-15</sup>. However joint pain resulting from the high mechanical loads associated with HRST often represents a barrier to this type of training in knee OA patients<sup>1, 16</sup>. Resistance training with low exercise loads (~30% 1 repetition maximum) performed with concurrent partial blood flow restriction to the working limb (Blood flow restricted exercise: BFRE) has received increasing clinical interest during the last decade<sup>1, 16-34</sup>. The application of low muscle/tendon/joint forces in BFRE has been documented to increase human skeletal muscle size and to cause substantial strength gains in healthy young and old individuals<sup>17</sup>, despite the low magnitude of mechanical stress imposed on the trained tissue. The adaptive mechanisms evoked by BFRE seem to involve accumulation of metabolites, ischemia (transient

1  
2  
3  
4 tissue hypoxia) and activation of myogenic muscle stem cells (satellite cells: SC) <sup>17, 24, 35</sup>. When  
5  
6 applied in the clinical setting, BFRE has demonstrated positive effects on skeletal muscle  
7  
8 hypertrophy, strength, and functional capacity in mild-degree knee OA patients <sup>1, 16, 33, 34</sup>, although  
9  
10 not observed in all studies <sup>33</sup>. Importantly, BFRE appears to be feasible with a high training  
11  
12 adherence in knee OA patients <sup>1, 33, 34</sup>.

13  
14  
15  
16 Satellite cells (SC) are quiescent myogenic stem cells positioned between the sarcolemma and  
17  
18 the myofiber basal lamina <sup>24, 36</sup>. SC plays an important role in human skeletal muscle growth due to  
19  
20 their ability to donate new myonuclei to the muscle fibers <sup>24, 37-41</sup>. The human skeletal muscle fibers  
21  
22 are multinucleated cells with each myonucleus controlling the protein synthesis of a certain  
23  
24 cytoplasmic area in the muscle fiber <sup>37-39, 41, 42</sup>. Myonuclei transcriptional activity can be fully  
25  
26 maximized with exercise, hence requiring new myonuclei to support further muscle tissue accretion  
27  
28 <sup>38-43</sup>. Furthermore, exercise-induced increases in SC and myonuclei content by means of  
29  
30 preconditioning BFRE might represent an effective atrophy-protective mechanism <sup>24, 44</sup>. Previous  
31  
32 studies applying short term (10 days) preoperative BFRE before an anterior cruciate ligament  
33  
34 rupture-reconstruction demonstrated no atrophy protective effect nor higher postoperative muscle  
35  
36 strength compared to performing a low-load exercise without blood flow restriction (placebo) .  
37  
38  
39  
40  
41  
42  
43  
44

### 45 **Aim and hypothesis of the trial**

46  
47 The primary aim of this trial is to investigate the efficacy of 8 weeks of BFRE compared to  
48  
49 receiving usual care prior to TKR on postoperative chair stand performance. We hypothesize that 8  
50  
51 weeks of preoperative BFRE will lead to increased performance 30 seconds chair stand  
52  
53 performance (30-seconds Chair Stand Test: 30-s CST) when assessed 3 months postoperatively.  
54  
55 Secondary aims are to investigate the efficacy of preoperative BFRE on lower limb muscle strength  
56  
57 3 months after TKR and investigate the potential relationship to functional capacity and quality of  
58  
59  
60

1  
2  
3  
4 life. Furthermore, it will be investigated to which extent 8 weeks of BFRE induces myofiber  
5  
6 hypertrophy and gains in satellite cell number and myonuclei content in the knee extensor  
7  
8 musculature.  
9

## 10 11 12 13 14 **MATERIAL & METHODS**

### 15 16 **Design**

17  
18 The trial is designed as a multicenter (2 sites), randomized, assessor blinded, controlled trial  
19  
20 following the CONSORT guidelines<sup>45</sup>. Primary endpoint will be 3 months after TKR. Additional  
21  
22 and secondary endpoints will be evaluated during the week of TKR, 6 weeks after TKR  
23  
24 (questionnaires only) and 12 months after TKR. Muscle biopsies will be obtained from all patients  
25  
26 undergoing surgery at Horsens Regional Hospital at baseline, during surgery and 3 months after  
27  
28 TKR.  
29  
30  
31  
32  
33  
34  
35

### 36 **Participants**

37  
38 Patient will be recruited from the Orthopedic Departments at Horsens and Silkeborg Regional  
39  
40 Hospitals.  
41  
42

43 Inclusion criteria: 1) Patients  $\geq 50$  years scheduled for TKR at Horsens- or Silkeborg Regional  
44  
45 Hospital.  
46  
47

48 Exclusion criteria: 1) Severe cardiovascular diseases (New York Heart Association (NYHA) class  
49  
50 III and IV), previous stroke incident, thrombosis incident; 2) Traumatic nerve injury in affected  
51  
52 limb 3) Unregulated hypertension (Systolic  $\geq 180$  or diastolic  $\geq 110$  mmHg) 4) Spinal cord injury; 5)  
53  
54 Planned other lower limb surgery within 12 months; 6) Cancer diagnosis and currently undergoing  
55  
56 chemo-, immuno-, or radiotherapy; 7) Inadequacy in written and spoken Danish; 8) an existing  
57  
58  
59  
60



1  
2  
3  
4 prosthesis in the index limb; 9) living more than 45 minutes from either Horsens Regional Hospital  
5  
6 or Silkeborg Regional Hospital; 10) Pregnancy.

7  
8  
9 The orthopedic surgeon will perform the initial inclusion of study participants. In case the  
10  
11 patient agrees to participate in the trial, the patient will be baseline-tested at the hospital by a  
12  
13 blinded (to group allocation) assessor. Patients declining to participate in the RCT will be offered  
14  
15 the option of participating in a parallel observational cohort trial.  
16  
17  
18  
19  
20

## 21 **Randomization**

22  
23 After baseline assessment, patients will be randomized (1:1) using Research Electronic Data  
24  
25 Capture (REDCap) randomization system to either the training (BFRE) group or the control (CON)  
26  
27 group. Prior to randomization, all patients will be booked for follow-up test sessions and surgery.  
28  
29 All randomization procedures will be performed by the physiotherapists in charge of the BFRE  
30  
31 training. Assessors performing the tests will be blinded to group allocation until completion of the  
32  
33 trial. A flow chart of the patient allocation procedures is depicted in Figure 1.  
34  
35  
36  
37  
38  
39

40 CON group: Participants in the CON group will follow usual care before a TKR and be encouraged  
41  
42 to continue their usual lifestyle up until TKR.  
43  
44

45  
46  
47  
48 BFRE group: Will perform supervised BFRE sessions 3 times per week for 8 weeks supervised by a  
49  
50 physiotherapist educated in administering BFRE. All BFRE sessions will be performed at either  
51  
52 Horsens Regional Hospital or Silkeborg Regional Hospital.  
53  
54  
55  
56  
57

58 *Insert figure 1 here*  
59  
60

## Intervention procedures

### BFRE

Each BFRE session will consist of a 10-min warm up (ergometer cycling) followed by two different unilateral lower-limb resistance training exercises: 1) leg press and 2) knee extension performed in standard strength training machines. Each exercise will be performed with the affected lower limb only and consist of 4 rounds interspaced by 30 seconds of rest. 1<sup>st</sup> round: 30 repetitions (reps); 2<sup>nd</sup> round: 15 reps; 3<sup>rd</sup> round: 15 reps; 4<sup>th</sup> round: until exhaustion. If patients can perform more than 15 repetitions in the 4<sup>th</sup> exercise set, the exercise load will be increased with the minimum extra load possible<sup>25</sup>. Participants will be instructed to perform both the eccentric and concentric contraction phases using a steady 2-sec pace duration. The 4<sup>th</sup> and final exercise set will be performed to the point of exhaustion defined as being unable to complete the final concentric contraction phase in 2 seconds. During the 30 sec rest period, patients will rest in a standardized resting position while maintaining the initial cuff-pressure. Between each exercise patients will have a 5-min "free-flow" rest period. The cuff will be released immediately after completion of the final exercise set.

The occlusion pressure during both exercises will be set at 60% of total limb occlusion pressure (LOP) and starting load intensity will be 30% 1 repetition maximum (1RM) in both exercises.

Individual LOP will be determined using a pneumatic, conically shaped, 12 cm wide, rigid cuff (Occlude Aps, Denmark) attached to the patient's most proximal area of the thigh on the affected side. While sitting on an examination table with the ankle and 1/3 of the lower limb off the table, a vascular Doppler probe (EDAN Instruments, inc., China) will be placed posterior to the medial malleolus over the posterior tibial artery to capture the auscultatory pulse. To determine the cuff

1  
2  
3  
4 pressure (mmHg) needed for total blood flow occlusion, the cuff will gradually be inflated in 20  
5  
6 mmHg steps until reaching the pressure where the auscultatory pulse is interrupted (LOP). First  
7  
8 time the auscultatory pulse is interrupted the examiner releases 10-20 mmHg pressure from the cuff  
9  
10 until the auscultatory pulse is present again. When the auscultatory pulse reappears the cuff is  
11  
12 inflated with 10 mmHg until LOP is found again. If the second LOP is identical to the first it will be  
13  
14 defined as LOP for that specific patient. Otherwise, the procedure will be repeated until determining  
15  
16 an identical LOP two consecutive times.  
17  
18  
19  
20  
21

22 *Insert table 1 here*  
23  
24  
25  
26  
27

## 28 **Outcome variables**

29  
30 Outcome assessments will be performed at baseline, in the week of surgery, 6 weeks after TKR, 3  
31  
32 months after TKR, and 12 months after TKR. Six weeks after TKR only questionnaires will be  
33  
34 completed. Two testers (the PhD-stipendiate and a trained physiotherapist) blinded to group  
35  
36 allocation will perform all baseline and follow-up measurements. Bergström needle muscle biopsies  
37  
38 <sup>46</sup> will be taken from vastus lateralis of the quadriceps in both lower limbs from patients included at  
39  
40 Regional Hospital Horsens only at baseline, during surgery, and 3 months after TKR by doctors  
41  
42 trained in performing the procedure. An overview of the data collection parameters is presented in  
43  
44 Table 2.  
45  
46  
47  
48  
49  
50

## 51 Primary outcome variable

52  
53 The primary outcome measure will be the change from baseline to 3 months follow-up in 30s-CST.  
54  
55 The 30s-CST measures the number of sit-to-stand repetitions completed within 30 seconds <sup>47, 48</sup> and  
56  
57 is a part of the OARSI-recommended minimum outcome core set representing the ability to perform  
58  
59  
60

1  
2  
3  
4 a sit-to-stand activity<sup>49</sup>. The 30s-CST is considered a valid and sensitive measure of lower-  
5  
6 extremity sit-to-stand function with good to excellent intra- and inter-observer reliability<sup>47-50</sup>.  
7  
8  
9

### 10 11 Secondary outcome variables

12  
13 Secondary outcome measures comprise The Timed Up and Go test<sup>50-52</sup>, 40-m fast-paced walk test<sup>50</sup>,  
14  
15 maximal isometric knee extensor and knee flexor strength assessed with hand-held dynamometry<sup>53</sup>,  
16  
17 <sup>54</sup>, knee extensor (VL) myofiber area, fibertype composition, satellite cell content, myonuclei  
18  
19 number<sup>14</sup>, the Knee disability and Osteoarthritis Outcome Score<sup>55, 56</sup>, EuroQol Group 5-  
20  
21 dimensions<sup>57</sup>, Numeric Ranking Scale for pain (NRS)<sup>58</sup>, and adverse events/postponement of TKR.  
22  
23  
24

### 25 Explorative outcome variables

26  
27 Type of postoperative rehabilitation received, medication, knee joint range of motion  
28  
29  
30  
31

### 32 Demographic data

33  
34 Gender, age, height, weight, civil status, level of educational, employment status, substance use  
35  
36 (alcohol and smoking), duration of knee symptoms, pain medication during past week due to knee-  
37  
38 related pain, and co-morbidities.  
39  
40  
41  
42

### 43 Adherence

44  
45 Adherence to training will be registered by the physiotherapists in charge of the exercise sessions.  
46  
47

48 High compliance is defined as attendance to the supervised BFRE of  $\geq 80\%$ .  
49  
50  
51

52  
53 *Insert table 2 here*  
54  
55  
56  
57  
58  
59  
60

## Sample size

The power and sample size calculation is based on the expected differences between the two subject groups from baseline to 3 months follow up<sup>8</sup>. Skoffer et al.<sup>8</sup> investigated the efficacy of 4 weeks of preoperative and 4 weeks postoperative HRST (intervention group) compared to 4 weeks of postoperative HRST only (control group) on 30-s CST 3 months after TKR<sup>8</sup>. The authors found a between-group difference of 3-4 repetition difference ( $14.7 \pm 4.7$  repetitions versus  $11.0 \pm 4.4$  repetitions) 3 months after TKR<sup>8</sup>.

To reduce the probability of type I errors and be able to detect a between-group difference also,  $\alpha$ -level is set at 0.05 ( $p < 0.05$ ) and  $\beta$ -level is set at 0.20 (80% power). Expecting a 3-repetitions between-group difference 3 months postoperatively and assuming a SD of 4.7 in both groups, 39 patients are required in each group (yielding a total of 78 patients). With an anticipated dropout rate of 10%, a total of 84 patients will be recruited for the trial.

## Statistical considerations

The primary efficacy analysis will be assessment of the between group difference in change in the 30-S CST from baseline to 3 months follow up (primary end point).

All descriptive statistics and tests will be reported in accordance with the recommendations of the “Enhancing the QUALity and Transparency Of health Research” (EQUATOR) network<sup>59</sup> and the CONSORT statement<sup>45</sup>. Intention-to-treat principle (i.e. all patients as randomized independent of departures from allocation treatment, compliance and/or withdrawals) and per protocol analysis will be conducted. A one-way analysis of variance (one-way ANOVA) model will be used to analyze between group mean changes in continuous outcome measures<sup>24</sup>. The model includes changes from baseline to 12 months follow-up. Between-intervention comparison from baseline to 3 months after surgery will be analyzed using a mixed linear model with patient ID as a random

1  
2  
3  
4 effect and time and group as fixed effects<sup>24,60</sup>. Also, to gain insights into the potential pre-to-post  
5  
6 training differences within the respective training or control groups, paired student t-tests will be  
7  
8 performed. Level of statistical significance is  $P < 0.05$ . *Secondary outcome variables*: Between-  
9  
10 intervention comparison from baseline to the week of surgery, 6 weeks after surgery, 3 and 12  
11  
12 months after surgery will be analyzed as described for the primary outcome. Regression analysis  
13  
14 will be used to analyze the potential associations between preoperative strength and postoperative  
15  
16 lower extremity function and self-reported outcome as well as between preoperative functional  
17  
18 capacity and postoperative functional capacity. Additionally, regression analysis will be used to  
19  
20 analyze the association between preoperative number of satellite cells and myonuclei on  
21  
22 postoperative isometric knee extensor muscle strength, muscle fiber cross sectional area, and  
23  
24 functional capacity. All statistical analysis will be performed using Stata.  
25  
26  
27  
28  
29  
30  
31  
32

### 33 **Ethical aspects and dissemination**

34  
35 The trial has been accepted by Central Denmark Region Committee on Biomedical Research Ethics  
36  
37 (Journal No 10-72-19-19) and by The Danish Data Protection Agency (Journal No 652164). The  
38  
39 trial is registered at Clinicaltrial.gov (NCT04081493). Before inclusion, all patients will provide  
40  
41 their written informed consent in accordance with the Helsinki Declaration. All data and  
42  
43 information collected in regard to this trial will be treated confidentially (blinded and encrypted) by  
44  
45 the researchers and staff connected to the trial.  
46  
47  
48

49 All results from the trial will be published in international peer-reviewed scientific journals  
50  
51 regardless of the results being considered positive, negative or inconclusive.  
52  
53  
54

### 55 **Patient and public involvement**

56  
57 Before developing this clinical trial, a pilot project was performed to determine feasibility and  
58  
59  
60

1  
2  
3  
4 efficacy of BFRE in patients suffering from lower limb injuries. The experiences with the training  
5  
6 modality and also the verbal feedback from patients on training duration, frequency, and intensity  
7  
8 resulted in useful knowledge that certainly have improved the development of the present clinical  
9  
10 trial.  
11  
12  
13  
14

## 15 **DISCUSSION**

16  
17 To our best knowledge, this is the first trial to investigate the effect of preoperative BFRE on  
18  
19 functional capacity, self-reported outcome, lower limb muscle strength and myofiber  
20  
21 morphology/stem cell abundance in patients scheduled for TKR. Only few studies have investigated  
22  
23 (short term (10 days)) preoperative BFRE without finding an atrophy protective effect or difference  
24  
25 in muscle strength compared to a control group performing a placebo intervention (SHAM group)  
26  
27 <sup>61</sup>. However, patients performing short term preoperative BFRE before ACL-R demonstrated higher  
28  
29 muscle endurance compared to a SHAM group <sup>62</sup>. Therefore, results of this trial are expected to  
30  
31 provide novel information on longer periods of BFRE that will enable to design effective exercise-  
32  
33 based preconditioning protocols for elective TKR patients.  
34  
35  
36  
37  
38  
39

40 The trial is designed as an assessor blinded randomized controlled trial, thus representing the  
41  
42 highest evidence level. However, the nature of the trial does not allow blinding of the participants  
43  
44 which is an inherent limitation of the trial. The trial is conducted at two hospitals that consistently  
45  
46 perform a high number TKR procedures annually (225 and 460, respectively), thus securing a  
47  
48 strong expertise in terms of surgery and infrastructure. Both hospitals have all equipment needed  
49  
50 available for surgery, post-operative hospitalization, training and testing. All outcome variables are  
51  
52 considered valid and reliable measures and consist of both objective outcomes and self-reported  
53  
54 patient outcomes.  
55  
56  
57  
58  
59  
60

1  
2  
3  
4 No adverse health-related events have been reported in previous studies applying BFRE in  
5  
6 patients' suffering from knee OA or in healthy older adults <sup>1, 16, 17, 27, 33, 34</sup>. Further, in a recent  
7  
8 review and meta-analysis it was stated that exercise with concurrent blood-flow restriction is a safe  
9  
10 exercise modality when occlusion procedures are applied correctly <sup>17</sup>. The inherent invasive  
11  
12 procedure of muscle biopsies may cause adverse events in rare occasions. Therefore, all muscle  
13  
14 biopsy samples will be collected by trained medical doctors and performed following administration  
15  
16 of local anesthesia and in fully sterile conditions. The needle muscle biopsy protocol have been  
17  
18 applied in a large number of previous investigations including very old frail subjects (97 years of  
19  
20 age) without any reporting of adverse events besides occasional muscle soreness <sup>15, 24, 46, 63, 64</sup>.  
21  
22  
23  
24  
25  
26

### 27 **Author contributions**

28  
29 All authors contributed to the design of the trial as well as to the writing of the manuscript and  
30  
31 approved the final version of the protocol.  
32  
33  
34  
35  
36

### 37 **Data statement**

38  
39 All obtained data will be stored in anonymized form at the Danish National Archives and deleted  
40  
41 after 10 years.  
42  
43  
44  
45  
46  
47

### 48 **Funding**

49  
50  
51 This work trial is supported by Aase og Ejnar Danielsens Foundation (100.000 dkk) and The  
52  
53 Foundation for health research of Central Denmark Region (99.658 dkk).  
54  
55  
56  
57  
58  
59  
60



1  
2  
3  
4 **Competing interest**

5  
6 None to be declared  
7  
8  
9

10  
11  
12 **Ethics approval**

13  
14 The trial has been accepted by Central Denmark Region Committee on Biomedical Research Ethics  
15  
16 (Journal No 10-72-19-19) and by The Danish Data Protection Agency (Reference No 652164).  
17  
18

19  
20 **Word count**

21  
22 2.648 words  
23  
24  
25  
26  
27  
28  
29  
30  
31  
32  
33  
34  
35  
36  
37  
38  
39  
40  
41  
42  
43  
44  
45  
46  
47  
48  
49  
50  
51  
52  
53  
54  
55  
56  
57  
58  
59  
60

## References

1. Ferraz RB, Gualano B, Rodrigues R, Kurimori CO, Fuller R, Lima FR, De Sá-Pinto AL, Roschel H. Benefits of resistance training with blood flow restriction in knee osteoarthritis. *Med Sci Sports Exerc* 2018.
2. Bade MJ, Kohrt WM, Stevens-Lapsley J. Outcomes before and after total knee arthroplasty compared to healthy adults. *J Orthop Sports Phys Ther* 2010.
3. Fransen M, McConnell S, Harmer AR, Van de, Simic M, Bennell KL. Exercise for osteoarthritis of the knee. *Cochrane Database of Systematic Reviews* 2015.
4. Skoffler B, Dalgas U, Mechlenburg I. Progressive resistance training before and after total hip and knee arthroplasty: A systematic review. *Clin Rehabil* 2015.
5. Sundhedsstyrelsen. Knæartrose - nationale kliniske retningslinjer og faglige visitationsretningslinjer. ; 2012. .
6. Franz A, Queitsch FP, Behringer M, Mayer C, Krauspe R, Zilkens C. Blood flow restriction training as a prehabilitation concept in total knee arthroplasty: A narrative review about current preoperative interventions and the potential impact of BFR. *Med Hypotheses* 2018.
7. Suetta C. Training-induced changes in muscle CSA, muscle strength, EMG, and rate of force development in elderly subjects after long-term unilateral disuse. *J Appl Physiol* 2004;97(5):1954-61.
8. Skoffler B, Maribo T, Mechlenburg I, Hansen PM, Søballe K, Dalgas U. Efficacy of preoperative progressive resistance training on postoperative outcomes in patients undergoing total knee arthroplasty. *Arthritis Care & Research* 2016.
9. Chesham RA, Shanmugam S. Does preoperative physiotherapy improve postoperative, patient-based outcomes in older adults who have undergone total knee arthroplasty? A systematic review. *Physiotherapy Theory and Practice* 2017.
10. Jagers JR, Simpson CD, Frost KL, Quesada PM, Topp RV, Swank AM, Nyland JA. Prehabilitation before knee arthroplasty increases postsurgical function: A case study. *Journal of Strength and Conditioning Research* 2007.
11. Rooks DS, Huang J, Bierbaum BE, Bolus SA, Rubano J, Connolly CE, Alpert S, Iversen MD, Katz JN. Effect of preoperative exercise on measures of functional status in men and women undergoing total hip and knee arthroplasty. *Arthritis Care and Research* 2006.
12. Calatayud J, Casaña J, Ezzatvar Y, Jakobsen MD, Sundstrup E, Andersen LL. High-intensity preoperative training improves physical and functional recovery in the early post-operative periods after total knee arthroplasty: A randomized controlled trial. *Knee Surgery, Sports Traumatology, Arthroscopy : Official Journal of the ESSKA* 2016.
13. Garber CE, Blissmer B, Deschenes MR, Franklin BA, Lamonte MJ, Lee IM, Nieman DC, Swain DP. Quantity and quality of exercise for developing and maintaining cardiorespiratory, musculoskeletal, and neuromotor fitness in apparently healthy adults: Guidance for prescribing exercise. *Med Sci Sports Exerc* 2011;43(7):1334-59.
14. Aagaard P, Andersen JL, Dyhre-Poulsen P, Leffers AM, Wagner A, Peter Magnusson S, Halkjær-Kristensen J, Simonsen EB. A mechanism for increased contractile strength of human pennate muscle in response to strength training: Changes in muscle architecture. *J Physiol (Lond)* 2001;534(2):613-23.
15. Andersen J, Aagaard P. Myosin heavy chain IIX overshoot in human skeletal muscle. *Muscle Nerve* 2000;23:1095-104.
16. Bryk FF, dos Reis AC, Fingerhut D, Araujo T, Schutzer M, Cury RdPL, Duarte A, Fukuda TY. Exercises with partial vascular occlusion in patients with knee osteoarthritis: A randomized clinical trial. *Knee Surgery, Sports Traumatology, Arthroscopy* 2016;24(5):1580-6.
17. Hughes L, Paton B, Rosenblatt B, Gissane C, Patterson SD. Blood flow restriction training in clinical musculoskeletal rehabilitation: A systematic review and meta-analysis. *Br J Sports Med* 2017.
18. Loenneke JP, Wilson JM, Balapur A, Thrower AD, Barnes JT, Pujol TJ. Time under tension decreased with blood flow-restricted exercise. *Clin Physiol Funct Imaging* 2012 Jul;32(4):268-73.
19. Loenneke JP, Thrower AD, Balapur A, Barnes JT, Pujol TJ. Blood flow-restricted walking does not result in an accumulation of metabolites. *Clin Physiol Funct Imaging* 2012 Jan;32(1):80-2.
20. Loenneke JP, Fahs CA, Rossow LM, Sherk VD, Thiebaud RS, Abe T, Bembem DA, Bembem MG. Effects of cuff width on arterial occlusion: Implications for blood flow restricted exercise. *Eur J Appl Physiol* 2012 Aug;112(8):2903-12.

- 1
- 2
- 3
- 4 21. Loenneke JP, Young KC, Fahs CA, Rossow LM, Bemben DA, Bemben MG. Blood flow restriction: Rationale for improving bone. *Med*
- 5 *Hypotheses* 2012 Apr;78(4):523-7.
- 6
- 7 22. Loenneke JP, Kim D, Fahs CA, Thiebaud RS, Abe T, Larson RD, Bemben DA, Bemben MG. The influence of exercise load with and without
- 8 different levels of blood flow restriction on acute changes in muscle thickness and lactate. *Clinical Physiology and Functional Imaging* 2017.
- 9
- 10 23. Ozaki H, Loenneke JP, Abe T. Blood flow-restricted walking in older women: Does the acute hormonal response associate with muscle
- 11 hypertrophy? *Clin Physiol Funct Imaging* 2017 Jul;37(4):379-83.
- 12
- 13 24. Nielsen JL, Aagaard P, Bech RD, Nygaard T, Hvid LG, Wernbom M, Suetta C, Frandsen U. Proliferation of myogenic stem cells in human
- 14 skeletal muscle in response to low-load resistance training with blood flow restriction. *J Physiol (Lond )* 2012;590(17):4351-61.
- 15
- 16 25. Jørgensen AN, Aagaard P, Nielsen JL, Frandsen U, Diederichsen LP. Effects of blood-flow-restricted resistance training on muscle function in a
- 17 74-year-old male with sporadic inclusion body myositis: A case report. *Clinical Physiology and Functional Imaging* 2016;36(6):504-9.
- 18
- 19 26. Kubo K, Komuro T, Ishiguro N, Tsunoda N, Sato Y, Ishii N, Kanehisa H, Fukunaga T. Effects of low-load resistance training with vascular
- 20 occlusion on the mechanical properties of muscle and tendon. *Journal of Applied Biomechanics* 2006;22(2):112-9.
- 21
- 22 27. Ozaki H, Sakamaki M, Yasuda T, Fujita S, Ogasawara R, Sugaya M, Nakajima T, Abe T. Increases in thigh muscle volume and strength by walk
- 23 training with leg blood flow reduction in older participants. *J Gerontol A Biol Sci Med Sci* 2011 Mar;66(3):257-63.
- 24
- 25 28. Ozaki H, Loenneke JP, Thiebaud RS, Stager JM, Abe T. Possibility of leg muscle hypertrophy by ambulation in older adults: A brief review. *Clin*
- 26 *Interv Aging* 2013;8:369-75.
- 27
- 28 29. TAKARADA Y, TAKAZAWA H, ISHII N. Applications of vascular occlusion diminish disuse atrophy of knee extensor muscles. *Med Sci*
- 29 *Sports Exerc* 2000;32(12):2035-9.
- 30
- 31 30. Takarada Y, Takazawa H, Sato Y, Takebayashi S, Tanaka Y, Ishii N. Effects of resistance exercise combined with moderate vascular occlusion on
- 32 muscular function in humans. *Journal of Applied Physiology (Bethesda, Md.: 1985)* 2000;88(6):2097-106.
- 33
- 34 31. Takarada Y, Nakamura Y, Aruga S, Onda T, Miyazaki S, Ishii N. Rapid increase in plasma growth hormone after low-intensity resistance exercise
- 35 with vascular occlusion. *J Appl Physiol (1985)* 2000 Jan;88(1):61-5.
- 36
- 37 32. Yamanaka T, Farley RS, Caputo JL. Occlusion training increases muscular strength in division IA football players. *J Strength Cond Res* 2012
- 38 Sep;26(9):2523-9.
- 39
- 40 33. Segal N, Davis MD, Mikesky AE. Efficacy of blood flow-restricted low-load resistance training for quadriceps strengthening in men at risk of
- 41 symptomatic knee osteoarthritis. *Geriatr Orthop Surg Rehabil* 2015 Sep;6(3):160-7.
- 42
- 43 34. Segal NA, Williams GN, Davis MC, Wallace RB, Mikesky AE. Efficacy of blood flow-restricted, low-load resistance training in women with risk
- 44 factors for symptomatic knee osteoarthritis. *PM R* 2015 Apr;7(4):376-84.
- 45
- 46 35. Scott BR, Loenneke JP, Slattery KM, Dascombe BJ. Exercise with blood flow restriction: An updated evidence-based approach for enhanced
- 47 muscular development. *Sports Med* 2015 Mar;45(3):313-25.
- 48
- 49 36. Mauro A. Satellite cell of skeletal muscle fibers. *The Journal of Biophysical and Biochemical Cytology* 1961.
- 50
- 51 37. Kadi F, Charifi N, Denis C, Lexell J. Satellite cells and myonuclei in young and elderly women and men. *Muscle and Nerve* 2004.
- 52
- 53 38. Olsen S, Aagaard P, Kadi F, Tufekovic G, Verney J, Olesen JL, Suetta C, Kjær M. Creatine supplementation augments the increase in satellite cell
- 54 and myonuclei number in human skeletal muscle induced by strength training. *J Physiol (Lond )* 2006.
- 55
- 56 39. Francaux M, Deldicque L. Exercise and the control of muscle mass in human. *Pflügers Archiv - European Journal of Physiology* 2018 10.
- 57
- 58 40. Kadi F, Schjerling P, Andersen LL, Charifi N, Madsen J, Christensen LR, Andersen JL. The effects of heavy resistance training and detraining on
- 59 satellite cells in human skeletal muscles. *J Physiol (Lond )* 2004.
- 60
41. Bazgir B, Fathi R, Valojerdi MR, Mozdziak P, Asgari A. Satellite cells contribution to exercise mediated muscle hypertrophy and repair. *Cell*
- Journal 2016.
42. Kadi F, Thornell LE. Concomitant increases in myonuclear and satellite cell content in female trapezius muscle following strength training. *Histochem Cell Biol* 2000.

- 1  
2  
3  
4 43. Petrella JK, Kim J-, Mayhew DL, Cross JM, Bamman MM. Potent myofiber hypertrophy during resistance training in humans is associated with  
5 satellite cell-mediated myonuclear addition: A cluster analysis. *J Appl Physiol* 2008.  
6  
7 44. Bruusgaard JC, Johansen IB, Egner IM, Rana ZA, Gundersen K. Myonuclei acquired by overload exercise precede hypertrophy and are not lost  
8 on detraining. *Proceedings of the National Academy of Sciences* 2010.  
9  
10 45. Moher D, Hopewell S, Schulz KF, Montori V, Gotzsche PC, Devereaux PJ, Elbourne D, Egger M, Altman DG, CONSORT. CONSORT 2010  
11 explanation and elaboration: Updated guidelines for reporting parallel group randomised trials. *Int J Surg* 2012;10(1):28-55.  
12  
13 46. Suetta C, Andersen JL, Dalgas U, Berget J, Koskinen S, Aagaard P, Magnusson SP, Kjaer M. Resistance training induces qualitative changes in  
14 muscle morphology, muscle architecture, and muscle function in elderly postoperative patients. *Journal of Applied Physiology* (Bethesda, Md.:  
15 1985) 2008;105(1):180-6.  
16  
17 47. Gill S, McBurney H. Reliability of performance-based measures in people awaiting joint replacement surgery of the hip or knee. *Physiother Res*  
18 *Int* 2008 Sep;13(3):141-52.  
19  
20 48. Jones CJ, Rikli RE, Beam WC. A 30-s chair-stand test as a measure of lower body strength in community-residing older adults. *Res Q Exerc*  
21 *Sport* 1999 Jun;70(2):113-9.  
22  
23 49. Dobson F, Bennell KL, Hinman RS, Abbott JH, Roos EM. Recommended performance - based tests to assess physical function in people  
24 diagnosed with hip or knee osteoarthritis. OARSI - Osteoarthritis Research Society International 2013.  
25  
26 50. Wright AA, Cook CE, Baxter GD, Dockerty JD, Abbott JH. A comparison of 3 methodological approaches to defining major clinically important  
27 improvement of 4 performance measures in patients with hip osteoarthritis. *J Orthop Sports Phys Ther* 2011 May;41(5):319-27.  
28  
29 51. Bloch ML, Jonsson LR, Kristensen MT. Introducing a third timed up & go test trial improves performances of hospitalized and community-  
30 dwelling older individuals. *J Geriatr Phys Ther* 2017 Jul/Sep;40(3):121-6.  
31  
32 52. Alghadir A, Anwer S, Brismée J. The reliability and minimal detectable change of timed up and go test in individuals with grade 1-3 knee  
33 osteoarthritis. *BMC Musculoskeletal Disorders* 2015.  
34  
35 53. C. N, V.A.B. S, Y. L, I. K, M V, Der Hulst, R.H.H. E, R.W. P. Reliability of hand-held dynamometry in patients awaiting total knee arthroplasty.  
36 *Physiotherapy* (United Kingdom) 2011.  
37  
38 54. Koblbauer IFH, Lambrecht Y, Van DH, Neeter C, Engelbert RHH, Poolman RW, Scholtes VA. Reliability of maximal isometric knee strength  
39 testing with modified hand-held dynamometry in patients awaiting total knee arthroplasty: Useful in research and individual patient settings? A  
40 reliability study. *BMC Musculoskeletal Disorders* 2011.  
41  
42 55. Lyman S, Lee YY, McLawhorn AS, Islam W, MacLean CH. What are the minimal and substantial improvements in the HOOS and KOOS and JR  
43 versions after total joint replacement? *Clin Orthop Relat Res* 2018 Dec;476(12):2432-41.  
44  
45 56. Roos EM, Lohmander LS. The knee injury and osteoarthritis outcome score (KOOS): From joint injury to osteoarthritis. *Health and Quality of*  
46 *Life Outcomes* 2003.  
47  
48 57. Wittrup-Jensen KU, Lauridsen J, Gudex C, Pedersen KM. Generation of a danish TTO value set for EQ-5D health states. *Scand J Public Health*  
49 2009 Jul;37(5):459-66.  
50  
51 58. Hawker GA, Mian S, Kendzerska T, French M. Measures of adult pain: Visual analog scale for pain (VAS pain), numeric rating scale for pain  
52 (NRS pain), McGill pain questionnaire (MPQ), short-form McGill pain questionnaire (SF-MPQ), chronic pain grade scale (CPGS), short form-  
53 36 bodily pain scale (SF-36 BPS), and measure of intermittent and constant osteoarthritis pain (ICOAP). *Arthritis Care Res* (Hoboken) 2011  
54 Nov;63 Suppl 11:S240-52.  
55  
56 59. Christensen R, Bliddal H, Henriksen M. Enhancing the reporting and transparency of rheumatology research: A guide to reporting guidelines.  
57 *Arthritis Res Ther* 2013 Feb 28;15(1):109.  
58  
59 60. Malcata RM, Hopkins WG, Pearson SN. Tracking career performance of successful triathletes. *Med Sci Sports Exerc* 2014 Jun;46(6):1227-34.  
60  
61. Grapar Zargi T, Drobnic M, Jkoder J, Strazar K, Kacin A. The effects of preconditioning with ischemic exercise on quadriceps femoris muscle  
atrophy following anterior cruciate ligament reconstruction: A quasi-randomized controlled trial. *Eur J Phys Rehabil Med* 2016 Jun;52(3):310-  
20.  
62. Zargi T, Drobnic M, Strazar K, Kacin A. Short-term preconditioning with blood flow restricted exercise preserves quadriceps muscle endurance in  
patients after anterior cruciate ligament reconstruction. *Front Physiol* 2018 Aug 24;9:1150.

1  
2  
3  
4  
5  
6  
7  
8  
9  
10  
11  
12  
13  
14  
15  
16  
17  
18  
19  
20  
21  
22  
23  
24  
25  
26  
27  
28  
29  
30  
31  
32  
33  
34  
35  
36  
37  
38  
39  
40  
41  
42  
43  
44  
45  
46  
47  
48  
49  
50  
51  
52  
53  
54  
55  
56  
57  
58  
59  
60

63. Malm C, Nyberg P, Engstrom M, Sjodin B, Lenkei R, Ekblom B, Lundberg I. Immunological changes in human skeletal muscle and blood after eccentric exercise and multiple biopsies. *J Physiol* 2000 Nov 15;529 Pt 1:243-62.

64. Ekblom B. The muscle biopsy technique. historical and methodological considerations. *Scand J Med Sci Sports* 2017 May;27(5):458-61.

For peer review only

## Tables

*Table 1.* Exercise variables for the blood-flow restricted exercise (BFRE) protocol

| Exercise variable                                 | Week 1-8                                                                                                 |
|---------------------------------------------------|----------------------------------------------------------------------------------------------------------|
| Level of LOP                                      | 60% LOP                                                                                                  |
| Sets                                              | 4                                                                                                        |
| Load intensity                                    | 30% 1RM                                                                                                  |
| Repetitions 1 <sup>st</sup> set                   | 30                                                                                                       |
| Repetitions 2 <sup>nd</sup> & 3 <sup>rd</sup> set | 15                                                                                                       |
| Repetitions 4 <sup>th</sup> set                   | To volitional failure                                                                                    |
| Contraction modes per repetition                  |                                                                                                          |
| Concentric                                        | 2 seconds                                                                                                |
| Isometric                                         | 0 seconds                                                                                                |
| Eccentric                                         | 2 seconds                                                                                                |
| Rest between repetitions                          | 0 seconds                                                                                                |
| Time under tension per repetition                 | 4 seconds                                                                                                |
| Range of movement                                 | maximum                                                                                                  |
| Rest between sets                                 | 30 seconds                                                                                               |
| Rest between sessions                             | ≥36 hours                                                                                                |
| Progression                                       | The minimal possible load (5 kilo) is added when patients perform >15 repetitions in 4 <sup>th</sup> set |

*Table 2.* Outcome measures to be collected.

| Outcome measures                                        | Data collection instrument        | Time-points of assessment      |
|---------------------------------------------------------|-----------------------------------|--------------------------------|
| <b>Primary outcome</b>                                  |                                   |                                |
| <b>Sit-to-stand function</b>                            | 30 seconds chair stand test       | B, S, 3 and 12 months          |
| <b>Secondary outcomes</b>                               |                                   |                                |
| <b>Isometric Knee extensor muscle strength</b>          | Handheld Dynamometer              | B, S, 3 and 12 months          |
| <b>Isometric Knee flexion muscle strength</b>           | Handheld Dynamometer              | B, S, 3 and 12 months          |
| <b>Gait speed</b>                                       | 4x10-meter walk test              | B, S, 3 and 12 months          |
| <b>Ambulatory capacity</b>                              | Timed Up & Go                     | B, S, 3 and 12 months          |
| <b>Muscle morphology and biology</b>                    | Muscle Biopsies                   | B, D, 3 months                 |
| <b>Pain</b>                                             | KOOS                              | B, S, 6 weeks, 3 and 12 months |
| <b>Symptoms</b>                                         | KOOS                              | B, S, 6 weeks, 3 and 12 months |
| <b>Activities of daily living</b>                       | KOOS                              | B, S, 6 weeks, 3 and 12 months |
| <b>Sports &amp; Recreation</b>                          | KOOS                              | B, S, 6 weeks, 3 and 12 months |
| <b>Quality of life</b>                                  | KOOS                              | B, S, 6 weeks, 3 and 12 months |
| <b>Socioeconomic costs</b>                              | EQ-5D                             | B, S, 6 weeks, 3 and 12 months |
| <b>Adverse Events</b>                                   | Questionnaire and medical records | S, 3 months                    |
| <b>Patient characteristics and related measurements</b> |                                   |                                |
| <b>Gender</b>                                           | Questionnaire                     | B                              |
| <b>Age</b>                                              | Questionnaire                     | B                              |
| <b>Height</b>                                           | Tape measure                      | B                              |
| <b>Body mass</b>                                        | Electronic body mass scale        | B                              |
| <b>Civil Status</b>                                     | Questionnaire                     | B                              |
| <b>Educational Level</b>                                | Questionnaire                     | B                              |
| <b>Employment Status</b>                                | Questionnaire                     | B                              |
| <b>Substance Use (alcohol, smoking)</b>                 | Questionnaire                     | B                              |
| <b>Duration of knee symptoms</b>                        | Questionnaire                     | B                              |
| <b>Pain medication during the last week</b>             | Questionnaire                     | B                              |

1  
2  
3  
4  
5  
6  
7  
8  
9  
10  
11  
12  
13  
14  
15  
16  
17  
18  
19  
20  
21  
22  
23  
24  
25  
26  
27  
28  
29  
30  
31  
32  
33  
34  
35  
36  
37  
38  
39  
40  
41  
42  
43  
44  
45  
46  
47  
48  
49  
50  
51  
52  
53  
54  
55  
56  
57  
58  
59  
60

|                                               |                                              |                                |
|-----------------------------------------------|----------------------------------------------|--------------------------------|
| <b>Com-morbidities</b>                        | Questionnaire                                | B                              |
| <b>Blood pressure</b>                         | Electronic upper limb blood pressure monitor | During the exercise period     |
| <b>Postoperative supervised physiotherapy</b> | Questionnaire                                | B, S, at each BBFRE session, 3 |
| <b>Exercise compliance and progression</b>    | Physiotherapist records                      | and 12 months                  |
| <b>NRS</b>                                    | PhD-stipendiate and physiotherapist records  |                                |

For peer review only

Figure 1. Patient flow

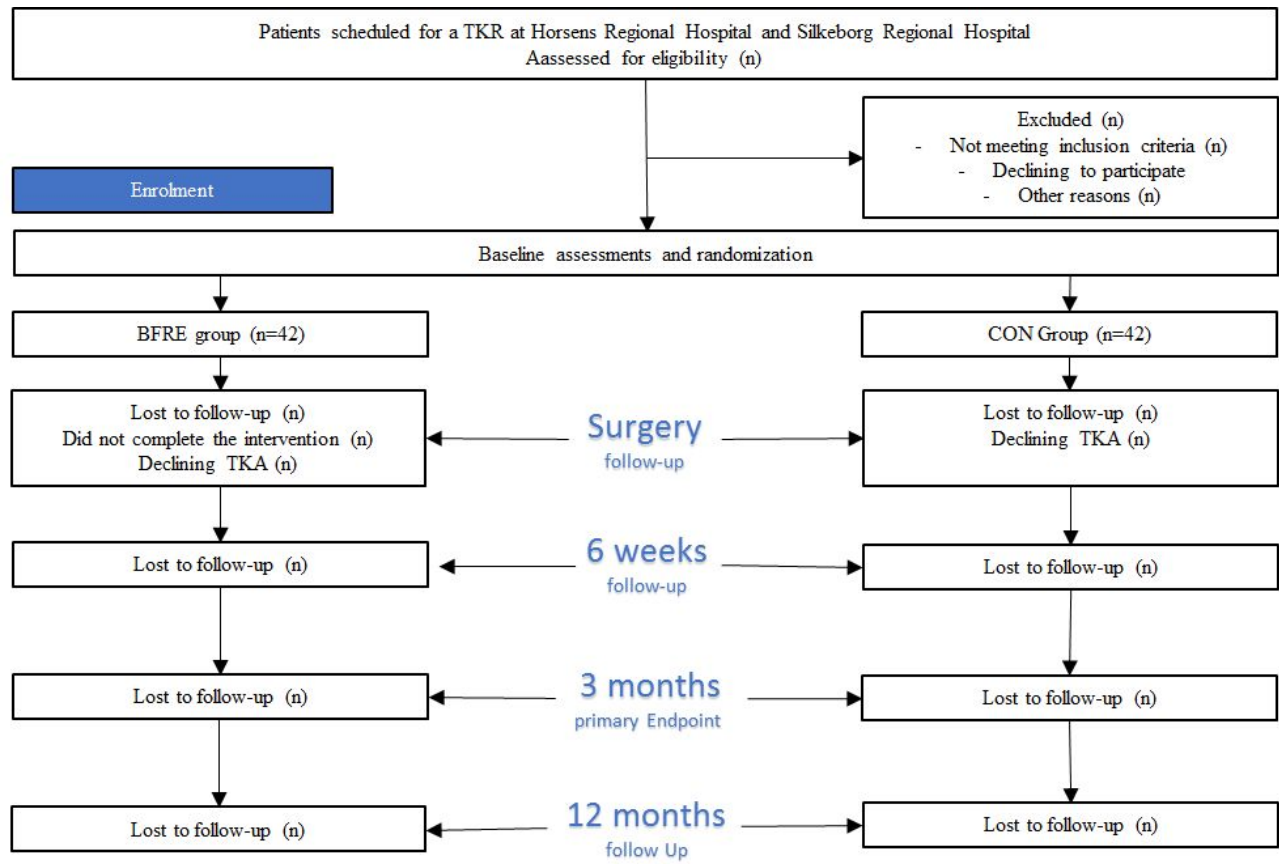

view only



## Table and figure legends

Table 1. LOP = Limb occlusion pressure; RM = Repetition maximum

Table 2. KOOS = Knee disability and Osteoarthritis Outcome Score; B = Baseline; S = 0-2 days before surgery; D = during surgery; 3 months = 3 months after TKR; 12 months = 12 after TKR; NRS = Numeric Ranking Scale of pain

Figure 1. Flow chart of the enrollment, treatment, and follow-up phases. TKR: Total Knee Replacement, BFRE: Low-load blood-flow restricted exercise

For peer review only

# Figure and figure legend

EXKnee project

Figure 1. Patient flow

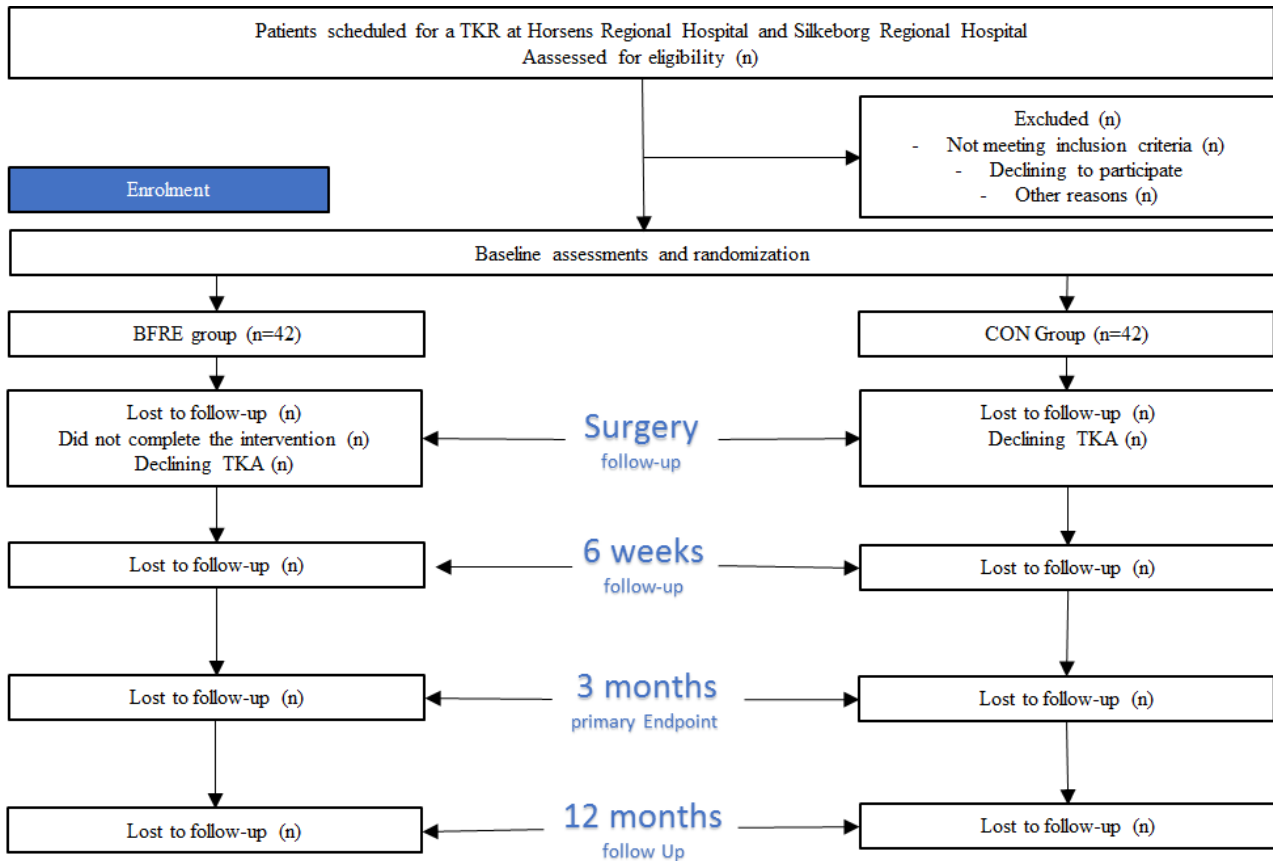

1  
2  
3  
4  
5  
6  
7  
8  
9  
10  
11  
12  
13  
14  
15  
16 Figure 1. Flow chart of the enrollment, treatment, and follow-up phases. TKR: Total Knee Replacement, BFRE: Low-load blood-flow  
17 restricted exercise  
18  
19  
20  
21  
22  
23  
24  
25  
26  
27  
28  
29  
30  
31  
32  
33  
34  
35  
36  
37  
38  
39  
40  
41

1  
2  
3  
4  
5  
6  
7  
8  
9  
10  
11  
12  
13  
14  
15  
16  
17  
18  
19  
20  
21  
22  
23  
24  
25  
26  
27  
28  
29  
30  
31  
32  
33  
34  
35  
36  
37  
38  
39  
40  
41

1  
2  
3  
4  
5  
6  
7  
8  
9  
10  
11  
12  
13  
14  
15  
16  
17  
18  
19  
20  
21  
22  
23  
24  
25  
26  
27  
28  
29  
30  
31  
32  
33  
34  
35  
36  
37  
38  
39  
40  
41

1  
2  
3  
4  
5  
6  
7  
8  
9  
10  
11  
12  
13  
14  
15  
16  
17  
18  
19  
20  
21  
22  
23  
24  
25  
26  
27  
28  
29  
30  
31  
32  
33  
34  
35  
36  
37  
38  
39  
40  
41

## Tables

*Table 1.* Exercise variables for the blood-flow restricted exercise (BFRE) protocol

| Exercise variable                                 | Week 1-8                                                                                                 |
|---------------------------------------------------|----------------------------------------------------------------------------------------------------------|
| Level of LOP                                      | 60% LOP                                                                                                  |
| Sets                                              | 4                                                                                                        |
| Load intensity                                    | 30% 1RM                                                                                                  |
| Repetitions 1 <sup>st</sup> set                   | 30                                                                                                       |
| Repetitions 2 <sup>nd</sup> & 3 <sup>rd</sup> set | 15                                                                                                       |
| Repetitions 4 <sup>th</sup> set                   | To volitional failure                                                                                    |
| Contraction modes per repetition                  |                                                                                                          |
| Concentric                                        | 2 seconds                                                                                                |
| Isometric                                         | 0 seconds                                                                                                |
| Eccentric                                         | 2 seconds                                                                                                |
| Rest between repetitions                          | 0 seconds                                                                                                |
| Time under tension per repetition                 | 4 seconds                                                                                                |
| Range of movement                                 | maximum                                                                                                  |
| Rest between sets                                 | 30 seconds                                                                                               |
| Rest between sessions                             | ≥36 hours                                                                                                |
| Progression                                       | The minimal possible load (5 kilo) is added when patients perform >15 repetitions in 4 <sup>th</sup> set |

*Table 2.* Outcome measures to be collected.

| Outcome measures                                        | Data collection instrument        | Time-points of assessment      |
|---------------------------------------------------------|-----------------------------------|--------------------------------|
| <b>Primary outcome</b>                                  |                                   |                                |
| <b>Sit-to-stand function</b>                            | 30 seconds chair stand test       | B, S, 3 and 12 months          |
| <b>Secondary outcomes</b>                               |                                   |                                |
| <b>Isometric Knee extensor muscle strength</b>          | Handheld Dynamometer              | B, S, 3 and 12 months          |
| <b>Isometric Knee flexion muscle strength</b>           | Handheld Dynamometer              | B, S, 3 and 12 months          |
| <b>Gait speed</b>                                       | 4x10-meter walk test              | B, S, 3 and 12 months          |
| <b>Ambulatory capacity</b>                              | Timed Up & Go                     | B, S, 3 and 12 months          |
| <b>Muscle morphology and biology</b>                    | Muscle Biopsies                   | B, D, 3 months                 |
| <b>Pain</b>                                             | KOOS                              | B, S, 6 weeks, 3 and 12 months |
| <b>Symptoms</b>                                         | KOOS                              | B, S, 6 weeks, 3 and 12 months |
| <b>Activities of daily living</b>                       | KOOS                              | B, S, 6 weeks, 3 and 12 months |
| <b>Sports &amp; Recreation</b>                          | KOOS                              | B, S, 6 weeks, 3 and 12 months |
| <b>Quality of life</b>                                  | KOOS                              | B, S, 6 weeks, 3 and 12 months |
| <b>Socioeconomic costs</b>                              | EQ-5D                             | B, S, 6 weeks, 3 and 12 months |
| <b>Adverse Events</b>                                   | Questionnaire and medical records | S, 3 months                    |
| <b>Patient characteristics and related measurements</b> |                                   |                                |
| <b>Gender</b>                                           | Questionnaire                     | B                              |
| <b>Age</b>                                              | Questionnaire                     | B                              |
| <b>Height</b>                                           | Tape measure                      | B                              |
| <b>Body mass</b>                                        | Electronic body mass scale        | B                              |
| <b>Civil Status</b>                                     | Questionnaire                     | B                              |
| <b>Educational Level</b>                                | Questionnaire                     | B                              |
| <b>Employment Status</b>                                | Questionnaire                     | B                              |
| <b>Substance Use (alcohol, smoking)</b>                 | Questionnaire                     | B                              |
| <b>Duration of knee symptoms</b>                        | Questionnaire                     | B                              |
| <b>Pain medication during the last week</b>             | Questionnaire                     | B                              |



1  
2  
3  
4  
5  
6  
7  
8  
9  
10  
11  
12  
13  
14  
15  
16  
17  
18  
19  
20  
21  
22  
23  
24  
25  
26  
27  
28  
29  
30  
31  
32  
33  
34  
35  
36  
37  
38  
39  
40  
41  
42  
43  
44  
45  
46  
47  
48  
49  
50  
51  
52  
53  
54  
55  
56  
57  
58  
59  
60

|                                               |                                              |                                |
|-----------------------------------------------|----------------------------------------------|--------------------------------|
| <b>Com-morbidities</b>                        | Questionnaire                                | B                              |
| <b>Blood pressure</b>                         | Electronic upper limb blood pressure monitor | During the exercise period     |
| <b>Postoperative supervised physiotherapy</b> | Questionnaire                                | B, S, at each BBFRE session, 3 |
| <b>Exercise compliance and progression</b>    | Physiotherapist records                      | and 12 months                  |
| <b>NRS</b>                                    | PhD-stipendiate and physiotherapist records  |                                |

For peer review only

## Table legends

Table 1. LOP = Limb occlusion pressure; RM = Repetition maximum

Table 2. KOOS = Knee disability and Osteoarthritis Outcome Score; B = Baseline; S = 0-2 days before surgery; D = during surgery; 3 months = 3 months after TKR; 12 months = 12 after TKR; NRS = Numeric Ranking Scale of pain

For peer review only

# BMJ Open

**The efficacy of low-load blood flow restricted resistance EXercise in patients with Knee osteoarthritis scheduled for total knee replacement (EXKnee). Protocol for a multicenter, randomized controlled trial.**

|                                 |                                                                                                                                                                                                                                                                                                                                                                                                           |
|---------------------------------|-----------------------------------------------------------------------------------------------------------------------------------------------------------------------------------------------------------------------------------------------------------------------------------------------------------------------------------------------------------------------------------------------------------|
| Journal:                        | <i>BMJ Open</i>                                                                                                                                                                                                                                                                                                                                                                                           |
| Manuscript ID                   | bmjopen-2019-034376.R1                                                                                                                                                                                                                                                                                                                                                                                    |
| Article Type:                   | Protocol                                                                                                                                                                                                                                                                                                                                                                                                  |
| Date Submitted by the Author:   | 03-Mar-2020                                                                                                                                                                                                                                                                                                                                                                                               |
| Complete List of Authors:       | Jørgensen, Stian; Regional Hospital Horsens, Department of occupational and physical therapy; Horsens Sygehus, H-HIP Aagaard, Per; Institute for Sports Science and Clinical Biomechanics, University of Southern Denmark, Bohn, Marie; Horsens Sygehus, Department of Orthopedic Surgery Mechlenburg, Inger; Aarhus University Hospital, Department of Orthopedics; Aarhus University, Clinical Medicine |
| <b>Primary Subject Heading</b>: | Sports and exercise medicine                                                                                                                                                                                                                                                                                                                                                                              |
| Secondary Subject Heading:      | Rehabilitation medicine                                                                                                                                                                                                                                                                                                                                                                                   |
| Keywords:                       | blood flow restriction exercise, knee osteoarthritis, total knee replacement surgery, preconditioning, functional capacity                                                                                                                                                                                                                                                                                |
|                                 |                                                                                                                                                                                                                                                                                                                                                                                                           |

SCHOLARONE™  
Manuscripts



I, the Submitting Author has the right to grant and does grant on behalf of all authors of the Work (as defined in the below author licence), an exclusive licence and/or a non-exclusive licence for contributions from authors who are: i) UK Crown employees; ii) where BMJ has agreed a CC-BY licence shall apply, and/or iii) in accordance with the terms applicable for US Federal Government officers or employees acting as part of their official duties; on a worldwide, perpetual, irrevocable, royalty-free basis to BMJ Publishing Group Ltd ("BMJ") its licensees and where the relevant Journal is co-owned by BMJ to the co-owners of the Journal, to publish the Work in this journal and any other BMJ products and to exploit all rights, as set out in our [licence](#).

The Submitting Author accepts and understands that any supply made under these terms is made by BMJ to the Submitting Author unless you are acting as an employee on behalf of your employer or a postgraduate student of an affiliated institution which is paying any applicable article publishing charge ("APC") for Open Access articles. Where the Submitting Author wishes to make the Work available on an Open Access basis (and intends to pay the relevant APC), the terms of reuse of such Open Access shall be governed by a Creative Commons licence – details of these licences and which [Creative Commons](#) licence will apply to this Work are set out in our licence referred to above.

Other than as permitted in any relevant BMJ Author's Self Archiving Policies, I confirm this Work has not been accepted for publication elsewhere, is not being considered for publication elsewhere and does not duplicate material already published. I confirm all authors consent to publication of this Work and authorise the granting of this licence.

1  
2  
3  
4 1 **The efficacy of low-load blood flow restricted resistance EXercise in patients with Knee**  
5 **osteoarthritis scheduled for total knee replacement (EXKnee). Protocol for a multicenter,**  
6 **2 randomized controlled trial.**  
7  
8 3  
9 4

10  
11 5 *Stian Langgård Jørgensen*<sup>1,2,5</sup>, *Marie Bagger Bohn*<sup>2</sup>, *Per Aagaard*<sup>3</sup>, *Inger Mechlenburg*<sup>4,5</sup>  
12 6

13  
14 7 <sup>1</sup>Department of Occupational and Physical Therapy, Horsens Regional Hospital, Denmark

15 8 <sup>2</sup>H-HIP, Department of Orthopedic Surgery, Horsens Regional Hospital, Denmark

16 9 <sup>3</sup>Department of Sports Science and Clinical Biomechanics, University of Southern Denmark

17 10 <sup>4</sup> Department of Orthopedic Surgery, Aarhus University Hospital, Denmark

18 11 <sup>5</sup>Department of Clinical Medicine, Aarhus University, Denmark  
19  
20  
21  
22  
23  
24  
25  
26  
27  
28  
29

30 15 Corresponding Author:

31 16 Name: PhD student Stian Langgård Jørgensen

32 17 Address: Horsens Regional Hospital, Sundvej 30C, DK-8700 Horsens

33 18 E-mail: [stiajo@rm.dk](mailto:stiajo@rm.dk)  
34  
35  
36  
37  
38  
39  
40  
41  
42  
43  
44  
45  
46  
47  
48  
49  
50  
51  
52  
53  
54  
55  
56  
57  
58  
59  
60

37 20 Phone: +45 22 71 17 82

42 23 Word count: 5.650  
43  
44  
45  
46  
47  
48  
49  
50  
51  
52  
53  
54  
55  
56  
57  
58  
59  
60

## 25 **ABSTRACT**

### 26 **Introduction**

27 Up to 20% of patients undergoing total knee replacement (TKR) surgery report no or suboptimal  
28 pain relief after TKR. Moreover, despite chances of recovering to preoperative functional levels,  
29 patients receiving TKR have demonstrated persistent deficits in quadriceps strength and functional  
30 performance compared to healthy aged-matched adults. We intend to examine if low-load blood  
31 flow restricted exercise (BFRE) is an effective preoperative method to increase functional capacity,  
32 lower limb muscle strength and self-reported outcomes after TKR. In addition, the study aims to  
33 investigate to which extent preoperative BFRE will protect against surgery-related atrophy 3  
34 months after TKR.

### 36 **Methods**

37 In this multicenter, randomized controlled and assessor blinded trial, 84 patients scheduled for TKR  
38 will be randomized to receive usual care and 8 weeks of preoperative BFRE or to follow usual care-  
39 only. Data will be collected at baseline, in the week of TKR, 6 weeks, 3 months, and 12 months  
40 after TKR. Primary outcome will be the change in 30-seconds chair stand test from baseline to 3  
41 months follow-up. Key secondary outcomes will be Timed Up & Go, 40-meter fast-paced walk test,  
42 isometric knee extensor and flexor strength, patient-reported outcome, and selected myofiber  
43 properties.

44 Intention-to-treat principle and per protocol analyses will be conducted. A one-way analysis of  
45 variance model will be used to analyze between group mean changes. Between-intervention  
46 comparison will be analyzed using a mixed linear model. Also, paired student t-tests will be  
47 performed and regression analysis will be used for analyzation of associations between selected  
48 outcomes.

1  
2  
3  
4 49  
5**6 50 Ethical approval**

7  
8  
9 51 The trial has been accepted by Central Denmark Region Committee on Biomedical Research Ethics  
10  
11 52 (Journal No 10-72-19-19) and The Danish Data Protection Agency (Journal No 652164). All results  
12  
13 53 will be published in international peer-reviewed scientific journals regardless of positive, negative  
14  
15  
16 54 or inconclusive results.  
17

18 55  
19**20 56 Trial registration**

21  
22  
23 57 The trial is registered at Clinical Trial (NCT04081493)  
24  
25 58

**27 59 Article Summary****30 60 Strengths and limitations of this study**

- 31  
32 61 • The trial is a multicenter, randomized controlled assessor blinded trial.  
33  
34 62 • This is the first clinical trial to investigate the effect of low-load ischemic resistance training  
35  
36 63 as a preconditioning method prior to elective knee replacement surgery.  
37  
38  
39 64 • Patients will not be blinded to their allocation into intervention groups (BFR vs. control)  
40  
41 65

**44 66 Key words**

45  
46 67 Blood flow restricted exercise, knee osteoarthritis, total knee replacement surgery, preconditioning  
47  
48  
49  
50  
51  
52  
53  
54  
55  
56  
57  
58  
59  
60

## 68 INTRODUCTION

69 Knee OA is a degenerative joint disease associated with pain, reduced physical activity, and quality  
70 of life and affects almost 40% of all individuals  $\geq 60$  years of age (1-5). Approaching end-stage knee  
71 OA, total knee replacement (TKR) is often the preferred treatment choice to reduce pain and regain  
72 functional capacity. That is, TKR is considered a highly successful treatment to improve quality of  
73 life and long-term function (6). However, despite being considered highly successful approximately  
74 20% of the patients undergoing TKA experience a suboptimal outcome (6), which has been  
75 suggested often to be related to incomplete restoration of physical function (7). In addition, TKR  
76 patients typically demonstrate long-lasting deficits in quadriceps strength and functional  
77 performance (2, 4). This failure to return to “normal” strength levels has been suggested to be  
78 associated with preoperatively lower limb muscle strength and function (2) .

79 Preconditioning exercise designed to prepare the musculoskeletal system to better tolerate  
80 stressful events such as the impact of invasive surgery has been suggested to be applicable prior to  
81 elective TKR (6). This is supported by the results of two randomized controlled trials indicating that  
82 preoperative heavy resistance strength training (HRST) may enhance functional capacity and knee  
83 extensor muscle strength 3 months postoperatively (7, 8). However, joint pain resulting from the  
84 high mechanical loads associated with HRST may represent a barrier to this type of training in some  
85 patients suffering from severe knee OA (1, 9). Therefore, a more tolerable, yet effective, alternative  
86 is needed for this population. Also, 3 recent systematic reviews investigating the topic of  
87 preoperative physiotherapy-based exercise before TKR have suggested high quality, well-powered  
88 evidence to investigate the efficacy of preoperative physiotherapy before TKR (10-12). Resistance  
89 training with low exercise loads ( $\sim 30\%$  1 repetition maximum) performed with concurrent partial  
90 blood flow restriction to the working limb (Blood flow restricted exercise: BFRE) has received  
91 increasing clinical interest during the last decade (1, 13-32). The application of low



1  
2  
3  
4 92 muscle/tendon/joint forces in BFRE has been documented to increase human skeletal muscle size  
5  
6 93 and to cause substantial strength gains in healthy young and old individuals, as well as some patient  
7  
8  
9 94 populations (13, 25, 26), despite the low magnitude of mechanical stress imposed on the trained  
10  
11 95 tissue. The adaptive mechanisms evoked by BFRE seem to involve accumulation of metabolites,  
12  
13 96 ischemia (transient tissue hypoxia) and activation of myogenic muscle stem cells (satellite cells:  
14  
15  
16 97 SC) (13, 26, 31). When applied in the clinical setting, BFRE has demonstrated positive effects on  
17  
18 98 skeletal muscle hypertrophy, strength, and functional capacity in mild-degree knee OA patients(1,  
19  
20 99 9, 33, 34) although not observed in all studies (33). Importantly, BFRE appears to be feasible with a  
21  
22  
23 100 high training adherence in knee OA patients (1, 33, 34). Furthermore, the use of different restrictive  
24  
25 101 pressures (absolute restrictive pressures: 160-200 mmHg and individualized pressure of 70% the  
26  
27 102 pressure needed to provide complete blood flow restriction) have been applied without any adverse  
28  
29  
30 103 events in mild-degree knee OA (1, 33, 34). This is in line Hughes et al. (13), who suggested that  
31  
32 104 when BFRE is performed correctly it has been demonstrated to be as safe as free-flow exercise  
33  
34 105 methods (13).

35  
36 106 Satellite cells (SC) are quiescent myogenic stem cells positioned between the sarcolemma and  
37  
38  
39 107 the myofiber basal lamina (31, 35). SC plays an important role in human skeletal muscle growth  
40  
41 108 due to their ability to donate new myonuclei to the muscle fibers (31, 36-40). That is, the human  
42  
43 109 skeletal muscle fibers are multinucleated cells with each myonucleus controlling the protein  
44  
45  
46 110 synthesis of a certain cytoplasmic area in the muscle fiber (36-38, 41). Myonuclei transcriptional  
47  
48 111 activity can be fully maximized with exercise, hence requiring new myonuclei to support further  
49  
50 112 muscle tissue accretion (37, 38, 40). It has been suggested that exercise-related addition of SCs and  
51  
52  
53 113 myonuclei by means of BFRE might reduce the muscle atrophy related to bedrest and/or prolonged  
54  
55 114 inactivity (31, 42). Previous studies applying short term (10 days) preoperative BFRE before an  
56  
57 115 anterior cruciate ligament rupture-reconstruction found no atrophy protective effect or higher  
58  
59  
60

1  
2  
3  
4 116 postoperative muscle strength compared to performing a low-load exercise without blood flow  
5  
6 117 restriction (placebo). However, it might be questionable if the applied training frequency, intensity  
7  
8  
9 118 and training period have been sufficient to promote SC and myonuclei addition. Thus, longer  
10  
11 119 periods of intensive training might be necessary to promote the desired muscle morphological  
12  
13 120 adaptations (addition of myonuclei and increased SC content).  
14  
15

16 121

### 17 18 122 **Aim and hypothesis of the trial**

19  
20 123 The primary aim of this trial is to investigate the efficacy of 8 weeks of BFRE compared to  
21  
22  
23 124 receiving usual care prior to TKR on postoperative chair stand performance. We hypothesize that 8  
24  
25 125 weeks of preoperative BFRE will lead to increased 30 seconds chair stand performance (30-seconds  
26  
27 126 Chair Stand Test: 30-s CST) when assessed 3 months postoperatively. Secondary aims are to  
28  
29  
30 127 investigate the efficacy of preoperative BFRE on lower limb muscle strength 3 months after TKR  
31  
32 128 and investigate the potential relationship to functional capacity and quality of life. Furthermore, it  
33  
34 129 will be investigated to which extent 8 weeks of BFRE induces myofiber hypertrophy and gains in  
35  
36 130 satellite cell number and myonuclei content in the knee extensor musculature.  
37  
38

39 131

## 40 41 132 **MATERIAL & METHODS**

### 42 43 133 **Design**

44  
45  
46 134 The trial is designed as a multicenter (2 sites), randomized, assessor blinded, controlled trial  
47  
48 135 following the CONSORT guidelines (43). Primary endpoint will be 3 months after TKR. Additional  
49  
50 136 and secondary endpoints will be evaluated during the week of TKR, 6 weeks after TKR  
51  
52  
53 137 (questionnaires only) and 12 months after TKR. Muscle biopsies will be obtained from all patients  
54  
55 138 undergoing surgery at Horsens Regional Hospital at baseline, during surgery and 3 months after  
56  
57 139 TKR.  
58  
59  
60

1  
2  
3  
4 140  
5  
6  
7 141 **Participants**

8  
9 142 Patient will be recruited from the Orthopedic Departments at Horsens and Silkeborg Regional  
10  
11 143 Hospitals in Denmark. Patient enrollment will start September 2<sup>nd</sup> 2019 at Horsens Regional  
12  
13 144 Hospital and October 1<sup>st</sup> 2019 at Silkeborg Regional Hospital. Patient recruitment is expected to be  
14  
15  
16 145 completed in June 2021. All patients are expected to have completed baseline testing ultimo June  
17  
18 146 2021 and have performed 3 months follow-up during September 2021. Thus, at the end of June  
19  
20 147 2022 all patients are expected to have completed 12 months follow-up testing.  
21  
22

23 148  
24  
25 149 Inclusion criteria: 1) Patients  $\geq 50$  years scheduled for TKR due to knee OA at Horsens- or  
26  
27 150 Silkeborg Regional Hospital.  
28  
29

30 151  
31  
32 152 Exclusion criteria: 1) Severe cardiovascular diseases (New York Heart Association (NYHA) class  
33  
34 153 III and IV), previous stroke incident, thrombosis incident; 2) Traumatic nerve injury in affected  
35  
36 154 limb 3) Unregulated hypertension (Systolic  $\geq 180$  or diastolic  $\geq 110$  mmHg) 4) Spinal cord injury; 5)  
37  
38  
39 155 Planned other lower limb surgery within 12 months; 6) Cancer diagnosis and currently undergoing  
40  
41 156 chemo-, immuno-, or radiotherapy; 7) Inadequacy in written and spoken Danish; 8) an existing  
42  
43 157 prosthesis in the index limb; 9) living more than 45 minutes from either Horsens Regional Hospital  
44  
45  
46 158 or Silkeborg Regional Hospital; 10) Pregnancy.  
47

48 159  
49  
50 160 All patients will be screened for eligibility by orthopedic surgeons at Horsens Regional Hospital  
51  
52 161 and Silkeborg Regional Hospital who will perform the initial inclusion of study participants and  
53  
54  
55 162 hand out written project information. All patients accepting to participate will be asked to complete  
56  
57 163 a written informed consent allowing the physiotherapist (at Horsens Regional Hospital and  
58  
59  
60

1  
2  
3  
4 164 Silkeborg Regional Hospital) to contact the patients by phone for a final eligibility and exclusion  
5  
6  
7 165 criteria-screening, and book an appointment for baseline testing. In case the patient agrees to  
8  
9 166 participate in the trial, the patient will sign a written informed consent to participate in the project.  
10  
11 167 Subsequently, the patient will be baseline-tested at the hospital by a blinded (to group allocation)  
12  
13  
14 168 assessor. Patients declining to participate in the RCT will be offered the option of participating in a  
15  
16 169 parallel observational cohort trial. All patients included in the project will be scheduled for a TKR  
17  
18 170 and receive a standard multimodal surgical program with standard preoperative care (usual care).  
19  
20  
21 171 Specifically, 2-3 weeks before surgery all patients will be invited to a preoperative information  
22  
23 172 meeting where nurses, surgeons, and physiotherapists will provide detailed information on pain  
24  
25 173 management, nutrition, the surgical procedure, physical activity, postoperative home-based  
26  
27 174 rehabilitation, load management, etc. (44) On the day of surgery, patients will be hospitalized at  
28  
29  
30 175 Horsens Regional Hospital or Silkeborg Regional Hospital where an orthopedic surgeon will  
31  
32 176 perform the TKR procedure. The day after surgery all patients will be trained once or twice per day  
33  
34 177 by a physiotherapist towards fulfilling the following discharge criteria: a minimum knee flexion  
35  
36  
37 178 range of motion (ROM) of 60/90 degree and maximally a knee extension ROM deficit of 15/5  
38  
39 179 degree knee extension (Horsens Region Hospital/ Silkeborg Regional Hospital), independency in  
40  
41 180 in-and-out of bed and sit-to-stand activities, independency in walking and stair-negotiation with  
42  
43 181 crutches, ADL activities, and sufficient understanding of the home-based exercises during the  
44  
45  
46 182 hospitalization period (44). Patients will generally be discharged within ~1-2 days after fulfilling all  
47  
48 183 the above discharge criteria. After discharge, all patients will as standard receive a standard home-  
49  
50 184 based rehabilitation program focusing on improving knee joint mobility, increasing the tolerance for  
51  
52  
53 185 standing without assistive devices (i.e. crutches), and lower extremity muscle strength. Small  
54  
55 186 variations in the selection of exercises in the standard home-based rehabilitation program exists  
56  
57 187 between hospitals, however, the purpose of the programs is identical. However, if the patients do  
58  
59  
60

1  
2  
3  
4 188 not fulfill the discharge criteria the patient will be offered supervised knee-specific exercise therapy  
5  
6 189 at municipal rehabilitation centers, or specialized hospital-based rehabilitation after discharge from  
7  
8  
9 190 the Hospital.  
10

## 11 191 12 13 **Randomization** 14

15  
16 193 After baseline assessment, patients will be randomized (1:1) using Research Electronic Data  
17  
18 194 Capture (REDCap) randomization system to either the training (BFRE) group or the control (CON)  
19  
20 195 group. Prior to randomization, all patients will be booked for follow-up test sessions and surgery.  
21  
22  
23 196 All randomization procedures will be performed by the physiotherapists in charge of the BFRE  
24  
25 197 training. Assessors performing the tests will be blinded to group allocation until completion of the  
26  
27 198 trial. A flow chart of the patient allocation procedures is depicted in Figure 1.  
28

29  
30 199  
31  
32 200 CON group: Participants in CON will receive usual care (see above) prior to TKR and be  
33  
34 201 encouraged to continue their usual lifestyle up until TKR.  
35

36 202  
37  
38 203 BFRE group: In addition to receiving usual care (cf. above), participants in the BFRE group will  
39  
40  
41 204 perform supervised BFRE sessions 3 times per week for 8 weeks supervised by a physiotherapist  
42  
43 205 educated in administering BFRE. All BFRE training will be performed at Horsens Regional  
44  
45 206 Hospital and Silkeborg Regional Hospital.  
46

47  
48 207  
49  
50 208 *Please insert Figure 1 about here*  
51

## 52 209 53 54 **Intervention procedures** 55

### 56 57 211 BFRE 58 59 60

1  
2  
3  
4 212 Each BFRE session will consist of a 10-min warm up (ergometer cycling) followed by two different  
5  
6 213 unilateral lower-limb resistance training exercises: 1) leg press and 2) knee extension performed in  
7  
8  
9 214 standard strength training machines. Each exercise will be performed with the affected lower limb  
10  
11 215 only and consist of 4 rounds interspaced by 30 seconds of rest. 1<sup>st</sup> round: 30 repetitions (reps); 2<sup>nd</sup>  
12  
13 216 round: 15 reps; 3<sup>rd</sup> round: 15 reps; 4<sup>th</sup> round: until exhaustion (Table 1). If patients can perform  
14  
15  
16 217 more than 15 repetitions in the 4<sup>th</sup> exercise set, the exercise load will be increased with the  
17  
18 218 minimum extra load possible (30). Participants will be instructed to perform both the eccentric and  
19  
20 219 concentric contraction phases using a steady 2-sec pace duration. The 4<sup>th</sup> and final exercise set will  
21  
22  
23 220 be performed to the point of exhaustion defined as being unable to complete the final concentric  
24  
25 221 contraction phase in 2 seconds. During the 30 sec rest period, patients will rest in a standardized  
26  
27 222 resting position while maintaining the initial cuff-pressure. Between each exercise, patients will  
28  
29  
30 223 have a 5-min "free-flow" rest period. The cuff will be released immediately after completion of the  
31  
32 224 final exercise set.

33  
34 225 The occlusion pressure during both exercises will be set at 60% of total limb occlusion pressure  
35  
36 226 (LOP) and starting load intensity will be 30% 1 repetition maximum (1RM) in both exercises.

37  
38  
39 227 Individual LOP will be determined using a pneumatic, conically shaped, 12 cm wide, rigid cuff  
40  
41 228 (Occlude Aps, Denmark) attached to the patient's most proximal area of the thigh on the affected  
42  
43 229 side. While sitting on an examination table with the ankle and 1/3 of the lower limb off the table, a  
44  
45  
46 230 vascular Doppler probe (EDAN Instruments, inc., China) will be placed posterior to the medial  
47  
48 231 malleolus over the posterior tibial artery to capture the auscultatory pulse. To determine the cuff  
49  
50 232 pressure (mmHg) needed for total blood flow occlusion, the cuff will gradually be inflated in 20  
51  
52 233 mmHg steps until reaching the pressure where the auscultatory pulse is interrupted (LOP). First  
53  
54  
55 234 time the auscultatory pulse is interrupted the examiner releases 10-20 mmHg pressure from the cuff  
56  
57 235 until the auscultatory pulse is present again. When the auscultatory pulse reappears the cuff is  
58  
59  
60

1  
2  
3  
4 236 inflated with 10 mmHg until LOP is found again. If the second LOP is identical to the first it will be  
5  
6 237 defined as LOP for that specific patient. Otherwise, the procedure will be repeated until determining  
7  
8  
9 238 an identical LOP two consecutive times.  
10

11 239  
12 240 *Please insert Table 1 abot here*  
13  
14 241

## 15 242 **Outcome variables**

16  
17  
18 243 Outcome assessments will be performed at baseline, in the week of surgery, 6 weeks after TKR, 3  
19  
20 244 months after TKR, and 12 months after TKR. To reduce the number of postoperative visits only  
21  
22 245 questionnaires; The Knee disability and Oteoarthritis Outcome Score (KOOS), EuroQol Group 5-  
23  
24 dimensions (EQ-5D-L5), and reporting of adverse event or receiving supervised physiotherapy  
25 246 postoperatively will sent via email 6 weeks after surgery. Two testers (two trained physiotherapists)  
26  
27 247 blinded to group allocation will perform all baseline and follow-up measurements. Bergström  
28  
29 248 needle muscle biopsies (45) will be taken from vastus lateralis of the quadriceps muscle in both  
30  
31  
32 249 lower limbs from patients included at Horsens Regional Hospital only at baseline, during surgery,  
33  
34 250 and 3 months after TKR by doctors trained in performing the procedure. An overview of the data  
35  
36 251 collection parameters is presented in Table 2.  
37  
38  
39 252

40  
41 253 Before starting the baseline testing, all assessors will be thoroughly trained in performing  
42  
43 254 the tests according to the standardized test procedures for each test method. To maintain fidelity of  
44  
45 255 testing during the study period, assessors will be retrained every 3<sup>rd</sup> month. Also, the  
46  
47  
48 256 physiotherapist in charge of LL-BFRE will be thoroughly trained in performing the exercise on  
49  
50 257 healthy subjects before applying LL-BFRE on study-patients. The primary investigator will be in  
51  
52 258 weekly contact with the physiotherapists supervising the LL-BFRE at Horsens Regional Hospitalet  
53  
54  
55 259 and Silkeborg Regional Hospital where day-to-day-retraining and supervision can be arranged.  
56  
57  
58  
59  
60

1  
2  
3  
4  
5  
6  
7  
8  
9  
10  
11  
12  
13  
14  
15  
16  
17  
18  
19  
20  
21  
22  
23  
24  
25  
26  
27  
28  
29  
30  
31  
32  
33  
34  
35  
36  
37  
38  
39  
40  
41  
42  
43  
44  
45  
46  
47  
48  
49  
50  
51  
52  
53  
54  
55  
56  
57  
58  
59  
60

260 Furthermore, physiotherapists supervising the LL-BFRE will receive in-depth retraining every 3<sup>rd</sup>  
261 month.

### 263 **Data management**

264 All data from the physical function tests will be entered into RedCap by the assessors, using double  
265 data entry to ensure data quality. All patient-reported outcome data (KOOS, NRS Pain, EQ-5D-5L)  
266 will be entered directly into RedCap by the patients, and usage of the “required fields” will ensure  
267 no missing items from the completed questionnaires. To reduce missing data, a reminder email will  
268 be sent automatically from the RedCap-system. All patient data will be anonymized by assigning  
269 study numbers to each patient (coding). Personal data about the patient will be located separately  
270 from the main dataset to protect confidentiality during all trial phases.

271 The raw dataset will be maintained for ten years after completion of the trial, with indefinite  
272 restricted access due to sensitive date. After publication of the trial, a fully anonymized patient-level  
273 dataset and corresponding statistical description will be made publicly available if required by the  
274 scientific journal, in which the results are published.

### 276 Primary outcome variable

277 The primary outcome measure will be the change in 30s-CST from baseline to 3 months follow-up.

### 279 Secondary outcome variables

280 Secondary outcome measures comprises The Timed Up and Go test (46-48), 40-m fast-paced walk  
281 test (46), maximal isometric knee extensor and knee flexor strength assessed with hand-held  
282 dynamometry (49, 50), knee extensor (VL) myofiber cross sectional area, muscle fibertype  
283 composition, satellite cell content, myonuclei number (51), the Knee disability and Osteoarthritis



1  
2  
3  
4 284 Outcome Score (52, 53), EuroQol Group 5-dimensions (54), Numeric Ranking Scale for pain  
5  
6 285 (NRS) (55), and adverse events/postponement of TKR.  
7  
8

9 286  
10  
11 287 Explorative outcome variables  
12

13 288 Type of postoperative rehabilitation received, medication and knee joint range of motion.  
14  
15  
16 289  
17

18 290 Demographic data  
19

20 291 Gender, age, height, weight, civil status, level of educational, employment status, substance use  
21  
22 (alcohol and smoking), duration of knee symptoms, pain medication during past week due to knee-  
23 292 related pain, and co-morbidities.  
24  
25 293  
26

27 294  
28  
29  
30 295 Adherence  
31

32 296 Adherence to training will be registered by the physiotherapists in charge of the exercise sessions.  
33

34 297 High compliance is defined as attendance to the supervised BFRE of  $\geq 80\%$ .  
35  
36  
37 298

38  
39 299 *Please insert Table 2 about here*  
40

41 300  
42  
43 301 Elaborated description of outcome measures  
44

45  
46 302 *Primary outcome*  
47

48 303 The 30s-CST will be assessed using a 44 cm (seat height) chair with armrests. The 30s-CST  
49  
50 304 measures the number of sit-to-stand repetitions completed within 30 seconds. The 30s-CST is  
51  
52 305 considered a valid and sensitive measure of lower-extremity sit-to-stand function with good to  
53  
54 306 excellent intra- and inter-observer reliability (46, 56, 57).  
55  
56

57 307  
58  
59  
60

1  
2  
3  
4 308 Secondary outcomes

6 309 **The Timed Up & Go test (TUG)** assesses the time required for patients to stand from a 44 cm  
8  
9 310 (seat height) chair walk around a tape mark 3 meters away and sit into the chair at return. The  
10  
11 311 patients will be instructed to walk as fast and safely as possible towards the tape mark (and touch  
12  
13 312 the tape mark (with at least one foot), turn around and return to the chair and sit down. Use of  
14  
15  
16 313 armrests are allowed. The fastest of two trials will be used for further analysis. Up to one minute of  
17  
18 314 rest will be allowed between trials (47, 58). Good inter-rater reliability has been demonstrated with  
19  
20 315 the TUG test (46).

22  
23 316  
24  
25 317 **4x10 meter walk test meter walk test (40m-FWT)** measures the total time taken to walk 4 x 10 m  
26  
27 318 excluding turns (meter/sec) (46). Patients will be instructed to walk as quickly and as safely as  
28  
29  
30 319 possible without running to a visible mark 10 m away, return and repeat for a total distance of 40 m  
31  
32 320 (46). Prior to the test one practice trial will be provided to check understanding. The 40m-FWT is a  
33  
34 321 valid and responsive measure for assessing short distance maximum walking speed with excellent  
35  
36 322 inter-rater reliability (46).

38  
39 323  
40  
41 324 **1RM leg press strength** will be estimated from a 5-8RM leg press test. Patients perform 3 low-load  
42  
43 325 warm-up sets. 1<sup>st</sup> and 2<sup>nd</sup> warm-up set consists of 12 repetitions, and the 3<sup>rd</sup> warm-up set consist of 8  
44  
45 326 repetitions. The load of each warm-up set will be increased with 10 kilos. After warm-up, the load  
46  
47  
48 327 will be increased to determine the 5RM. If the 5RM cannot be determined within 3 trials, an 4<sup>th</sup> all-  
49  
50 328 out trial (as many repetitions as possible) will be performed. The 1RM will be calculated as [1RM =  
51  
52 329 load (kg)/1.0278-0.0278·number of repetitions)] (59).

54  
55 330

56  
57  
58  
59  
60

1  
2  
3  
4  
5  
6  
7  
8  
9  
10  
11  
12  
13  
14  
15  
16  
17  
18  
19  
20  
21  
22  
23  
24  
25  
26  
27  
28  
29  
30  
31  
32  
33  
34  
35  
36  
37  
38  
39  
40  
41  
42  
43  
44  
45  
46  
47  
48  
49  
50  
51  
52  
53  
54  
55  
56  
57  
58  
59  
60

**1RM knee extension strength** will be estimated from 5-8RM knee extension test as described above for the estimation of 1RM leg press test (59).

**Maximal isometric voluntary contraction (MVC) of the knee** will be measured using a hand held dynamometer (HHD). The patients will be seated on an examination table with knees and hips positioned at 90° flexion. The patients will be instructed to remain seated in an upright position and place both hands on the shoulder to avoid compensation. The HHD will be fixed with a rigid belt to the examination table. Adjustable straps will be used to allow MVCs of the knee extensors to be performed at 90° knee flexion in all patients. The HDD will be positioned 5 cm above the medial malleolus (50). The patients will be instructed to produce as much force as possible into the HHD as possible. Good to excellent inter- and intra-rater reliability has previously been demonstrated on group-level in patients suffering from knee OA for maximum knee extensor muscle strength testing with HDD (49, 50). Patients will receive 4 trials. For analysis, the mean maximal strength of the 2<sup>nd</sup>, 3<sup>rd</sup>, and 4<sup>th</sup> measures will be calculated and corrected for bodyweight (50)

**MVC of the knee flexors** will be measured will be performed using HHD at 90° knee flexion with the patients seated identically as during MVC for the knee extensors (50). The HHD will be positioned posterior aspect of calcaneus (50) and patients will be instructed to produce as much force as possible into the HHD. Good to excellent inter- and intra-rater reliability has previously been demonstrated on group-level in patients suffering from knee OA for maximum knee flexor muscle strength testing with HDD (50). Patients will receive 4 trials. For analysis, the mean maximal strength of the 2<sup>nd</sup>, 3<sup>rd</sup>, and 4<sup>th</sup> measures will be calculated and corrected for bodyweight (50)

1  
2  
3  
4 355 **Myofiber cross sectional area (CSA), muscle fiber type composition, satellite cell content, and**  
5  
6 356 **myonuclei number** will be assessed by obtaining needle biopsies (100-150 mg) from all patients  
7  
8  
9 357 enrolled at Horsens Regional Hospital. The biopsies will be obtained bilaterally from the middle  
10  
11 358 portion of the vastus lateralis muscle utilizing the percutaneous needle biopsy technique of  
12  
13 359 Bergström (45, 60, 61). Biopsies will be performed by two experienced orthopedic surgeons (chief  
14  
15  
16 360 physicians) trained in performing the needle muscle biopsy technique at Horsens Regional Hospital.  
17  
18 361 Efforts will be made to extract tissue from the same region (2-3 cm apart) and depth (~1-2 cm.)  
19  
20 362 (45). The tissue samples will be dissected of all visible blood, adipose tissue, and connective tissue  
21  
22  
23 363 and mounted in Tissue-Tec (4583, Sakura Finetek, Alphen aan den Rijn, The Netherlands), frozen  
24  
25 364 in isopentane pre-cooled with liquid nitrogen, and stored at -80°C (31, 45, 51). All muscle samples  
26  
27 365 will be analyzed as previously described by Nielsen et al. (31) using immunofluorescence  
28  
29  
30 366 microscopy. Transverse serial sections (8 µm) of the embedded muscle biopsy specimen will be cut  
31  
32 367 at -22°C using a cryostat (HM560; Microm, Walldorf, Germany) and will be mounted on glass  
33  
34 368 slides for subsequent analysis as described in detail elsewhere (31). Myogenic stem cells (satellite  
35  
36  
37 369 cells (SC)) will be visualized with an antibody against Pax7 (31). Type I (stained) and Type II  
38  
39 370 (unstained) myofibers will be differentiated, and muscle fiber area will be determined (31): MSC-  
40  
41 371 derived nuclei will stain positive for Pax7 and be within the basal lamina; nuclei (DAPI stained)  
42  
43 372 with a sublaminar placement will be considered myonuclei (31).  
44  
45

46 373  
47  
48 374 **Knee disability and Osteoarthritis Outcome Score (KOOS)** is a patient-administered knee  
49  
50 375 specific questionnaire comprising five subscales Pain; Symptoms; Activities of daily living; Sport  
51  
52  
53 376 & Recreation; and Knee-Related Quality of Life. Each item is scored from 0 to 4 (53). The raw  
54  
55 377 score for each of the five subscales is the total sum of the associated item scores. Scores can be  
56  
57 378 transformed to a 0 to 100 scale. The scores of the five subscales can be expressed as a composite  
58  
59  
60

1  
2  
3  
4 379 outcome profile, higher scores indicating fewer problems (62). The KOOS questionnaire is valid  
5  
6  
7 380 and reliable in patients suffering from knee OA and patients on the waiting list for TKA for knee  
8  
9 381 OA (52, 53, 63).

10  
11 382  
12  
13 383 **EuroQol Group 5-dimension (EQ-5D-5L)** is a self-completion questionnaire consisting of two  
14  
15  
16 384 parts; first part of the EQ-5D-5L comprises five dimensions involving mobility, self-care, usual  
17  
18 385 activities, pain/discomfort, and anxiety/depression. All dimensions have five response categories  
19  
20 386 (no problems, slight problems, moderate problems, severe problems, and extreme problems)  
21  
22  
23 387 resulting in a five digit descriptive health state (64), which will be converted into a summary index  
24  
25 388 ranging from -0.624 (worst) to 1.000 (best), using a Danish value set (54). The second part, EQ-  
26  
27 389 VAS rates the overall current health status from 0 (worst imaginable health) to 100 (best imaginable  
28  
29  
30 390 health) (64). The EQ-5D-5L is reliable and valid in patients with knee osteoarthritis eligible for  
31  
32 391 TKA, (65, 66)

33  
34 392  
35 393 **Adverse events** will be defined as unpredicted or unintended events, signs, or disease occurring  
36  
37  
38 394 during the period from inclusion until the 3-month follow-up (primary end-point) resulting in  
39  
40 395 contact with the healthcare system (hospital or general practitioner) independent of whether or not  
41  
42 396 the event is related to the intervention or outcome assessments. Adverse events will be recorded and  
43  
44 397 categorized in accordance with the definitions established by the United States Food and Drug  
45  
46  
47 398 Administration [88]. Continuous registration of adverse events will be performed and a short open-  
48  
49 399 ended questionnaire will be administered at 3-months and 12 months follow-up.

50  
51 400  
52  
53  
54 401 *Other Outcome Measures*

55  
56 402 **Blood pressure** will be measured by the orthopedic surgeon when patients are visiting the  
57  
58 403 outpatient clinic. Blood pressure will be used to determine eligibility to participate in the project.  
59  
60

1  
2  
3  
4  
5  
6  
7  
8  
9  
10  
11  
12  
13  
14  
15  
16  
17  
18  
19  
20  
21  
22  
23  
24  
25  
26  
27  
28  
29  
30  
31  
32  
33  
34  
35  
36  
37  
38  
39  
40  
41  
42  
43  
44  
45  
46  
47  
48  
49  
50  
51  
52  
53  
54  
55  
56  
57  
58  
59  
60

404

405

**Exercise compliance and progression** will be obtained by the physiotherapist in charge of the training sessions and entered directly into the REDCap-system. The progression will be monitored as the total load lifted by the patient for exercise session.

408

409

**Declining to be operated** will be measured at 3 months follow up, where patients will be asked whether they decided to be operated or not. Patients who declined to be operated will be invited to participate will be invited to participate in all prescheduled follow-up assessments.

412

413

**Postoperative supervised physiotherapy** will be measured at 6 weeks, 3 months, and 12 months follow-up by answering a questionnaire. If patients have participated in postoperative supervised physiotherapy, the patient must specify whether the treatment was related to the TKR or due to other circumstances.

417

418

**Knee joint active range of motion** will be measured with a 360° plastic goniometer (scale 1°) with 16.5 cm moveable arms at baseline, in the week of surgery, 3 months, and 12 months after surgery. Laying supine on an examination table, the knee joint flexion and knee joint extension will be measured separately (67). The tester then identifies the most prominent part of the trochanter, the lateral epicondyle of the femur, the lateral head of fibula, and the lateral malleolus. When identified, the patient is asked to flex the knee as much as possible with the heel maintaining contact to the surface at all time (67). Secondly, the patients will be asked to extend the knee joint as much as possible. To allow the knee to extend as much as possible a firm quadratic box (height: 5 cm, width: 8 cm, length: 15 cm) will be placed under the heel of the patient. The procedure of measuring knee extension will be similar to knee flexion, as the patients increases the degree of knee extension

1  
2  
3  
4 428 maximally (67) The fulcrum of the goniometer will correspond visually to the trans-epicondylar  
5  
6 429 axis of the knee joint. The moveable arms of the goniometer will be pointed towards the greater  
7  
8  
9 430 trochanter and the lateral malleolus while (67).  
10

### 11 431 12 13 14 432 **Sample size**

15  
16 433 The power and sample size calculation is based on the expected differences between the two subject  
17  
18 434 groups from baseline to 3 months follow up (8). Skoffler et al. (8) investigated the efficacy of 4  
19  
20 435 weeks of preoperative and 4 weeks postoperative HRST (intervention group) compared to 4 weeks  
21  
22  
23 436 of postoperative HRST only (control group) on 30-s CST 3 months in patients receiving a TKR (8).  
24  
25 437 The authors found a between-group difference of 3-4 repetition difference ( $14.7 \pm 4.7$  repetitions  
26  
27  
28 438 versus  $11.0 \pm 4.4$  repetitions) 3 months after TKR surgery (8).  
29

30 439 To reduce the probability of type I errors and be able to detect a between-group difference also,  
31  
32 440  $\alpha$ -level is set at 0.05 ( $p < 0.05$ ) and  $\beta$ -level is set at 0.20 (80% power). Expecting a 3-repetitions  
33  
34  
35 441 between-group difference 3 months postoperatively and assuming a SD of 4.7 in both groups, 39  
36  
37 442 patients are required in each group (yielding 78 patients in total). With an anticipated dropout rate  
38  
39 443 of 10%, 84 patients will be recruited for the trial in total.  
40

### 41 42 444 43 44 445 **Statistical considerations**

45  
46 446 The primary efficacy analysis will be assessment of the between group difference in change in the  
47  
48 447 30-S CST from baseline to 3 months follow up (primary endpoint).  
49

50  
51 448 All descriptive statistics and tests will be reported in accordance with the recommendations of  
52  
53 449 the “Enhancing the QUALity and Transparency Of health Research” (EQUATOR) network (68) and  
54  
55 450 the CONSORT statement (43). Intention-to-treat principle (i.e. all patients as randomized  
56  
57  
58 451 independent of departures from allocation treatment, compliance and/or withdrawals) and per  
59  
60

1  
2  
3  
4 452 protocol analysis will be conducted. A one-way analysis of variance (one-way ANOVA) model will  
5  
6  
7 453 be used to analyze between group mean changes in continuous outcome measures (31). The model  
8  
9 454 includes changes from baseline to 12 months follow-up. Between-intervention comparison from  
10  
11 455 baseline to 3 months after surgery will be analyzed using a mixed linear model with patient ID as a  
12  
13  
14 456 random effect and time and group as fixed effects (31, 69). Also, to gain insights into the potential  
15  
16 457 pre-to-post training differences within the respective training or control groups, paired student t-  
17  
18 458 tests will be performed. Level of statistical significance is  $P < 0.05$ . *Secondary outcome variables:*  
19  
20  
21 459 Between-intervention comparison from baseline to the week of surgery, 6 weeks after surgery, 3  
22  
23 460 and 12 months after surgery will be analyzed as described for the primary outcome. Regression  
24  
25 461 analysis will be used to analyze the potential associations between preoperative strength and  
26  
27 462 postoperative lower extremity function and self-reported outcome as well as between preoperative  
28  
29  
30 463 functional capacity and postoperative functional capacity. Additionally, regression analysis will be  
31  
32 464 used to analyze the association between preoperative number of satellite cells and myonuclei on  
33  
34 465 postoperative isometric knee extensor muscle strength, muscle fiber cross sectional area, and  
35  
36  
37 466 functional capacity. All statistical analysis will be performed by the primary investigator using  
38  
39 467 Stata.

#### 43 469 **Ethical aspects and dissemination**

45  
46 470 The trial has been accepted by Central Denmark Region Committee on Biomedical Research Ethics  
47  
48 471 (Journal No 10-72-19-19) and by The Danish Data Protection Agency (Journal No 652164). The  
49  
50 472 trial is registered at Clinicaltrial.gov (NCT04081493). Before inclusion, all patients will provide  
51  
52  
53 473 their written informed consent in accordance with the Helsinki Declaration. All data and  
54  
55 474 information collected in regard to this trial will be treated confidentially (blinded and encrypted) by  
56  
57 475 the researchers and staff connected to the trial.



1  
2  
3  
4 476 All results from the trial will be published in international peer-reviewed scientific journals  
5  
6  
7 477 regardless of the results being considered positive, negative or inconclusive.  
8

## 9 478 10 11 479 **Patient and public involvement**

12  
13 480 Before developing this clinical trial, a pilot project was performed to determine feasibility and  
14  
15  
16 481 efficacy of BFRE in patients suffering from lower limb injuries. The experiences with the training  
17  
18 482 modality and the verbal feedback from patients on training duration, frequency, and intensity  
19  
20 483 resulted in useful knowledge that certainly have improved the development of the present clinical  
21  
22  
23 484 trial.  
24

## 25 485 26 27 486 **DISCUSSION**

28  
29  
30 487 To our best knowledge, this is the first trial to investigate the effect of preoperative BFRE on  
31  
32 488 functional capacity, self-reported outcome, lower limb muscle strength and myofiber  
33  
34 489 morphology/stem cell abundance in patients scheduled for TKR. Only few studies have investigated  
35  
36 490 (short term (10 days)) preoperative BFRE without finding an atrophy protective effect or difference  
37  
38  
39 491 in muscle strength compared to a control group performing a placebo intervention (SHAM group)  
40  
41 492 (70). However, patients performing short term preoperative BFRE before ACL-R demonstrated  
42  
43 493 higher muscle endurance compared to a SHAM group (71). Therefore, results of this trial are  
44  
45  
46 494 expected to provide novel information on longer periods of BFRE that will enable to design  
47  
48 495 effective exercise-based preconditioning protocols for elective TKR patients. The LL-BFRE  
49  
50 496 protocol applied in the present project is widely used and follows the recommendations from a  
51  
52  
53 497 recent position stand by Patterson et al. (72). The authors suggested that exercising 2-3 times per  
54  
55 498 week at 20-40% of 1RM in 2-4 sets (e.g. 30-15-15-15 or sets to failure) using pressures between 40  
56  
57  
58  
59  
60

1  
2  
3  
4  
5  
6  
7  
8  
9  
10  
11  
12  
13  
14  
15  
16  
17  
18  
19  
20  
21  
22  
23  
24  
25  
26  
27  
28  
29  
30  
31  
32  
33  
34  
35  
36  
37  
38  
39  
40  
41  
42  
43  
44  
45  
46  
47  
48  
49  
50  
51  
52  
53  
54  
55  
56  
57  
58  
59  
60

to 80% of LOP has demonstrated to be effective when aiming at increasing muscle strength and promoting muscle hypertrophy (72).

The trial is designed as an assessor blinded randomized controlled trial, thus representing the highest evidence level. However, the nature of the trial does not allow blinding of the participants which is an inherent limitation of the trial. The trial is conducted at two hospitals that consistently perform a high number TKR procedures annually (225 and 460, respectively), thus securing a strong expertise in terms of surgery and infrastructure. Both hospitals have all equipment needed available for surgery, post-operative hospitalization, training, and testing. All outcome variables are considered valid and reliable measures and consist of both objective outcomes and self-reported patient outcomes.

No adverse health-related events have been reported in previous studies applying BFRE in patients' suffering from knee OA or in healthy older adults (1, 9, 13, 23, 33, 34). Further, in a recent review and meta-analysis it was stated that exercise with concurrent blood-flow restriction is a safe exercise modality when occlusion procedures are applied correctly (13). The inherent invasive procedure of muscle biopsies may cause adverse events in rare occasions. Therefore, all muscle biopsy samples will be collected by trained medical doctors and performed following administration of local anesthesia and in fully sterile conditions. The needle muscle biopsy protocol have been applied in a large number of previous investigations including very old frail subjects (97 years of age) without any reporting of adverse events besides occasional muscle soreness(31, 45, 60, 73, 74).

There are some limitations of the project that must be taken into account. First, our primary end point is 3 months postoperatively. The (uncontrolled) period discharge to 3 months postoperatively renders the project vulnerable to external variabilities. However, from a pragmatic point of view, this uncontrolled period from discharge to 3 months follow-up reflects the reality that Danish patients faces postoperatively. Thus, the results at 3 months follow-up will, indeed, reflect the

1  
2  
3  
4  
5  
6  
7  
8  
9  
10  
11  
12  
13  
14  
15  
16  
17  
18  
19  
20  
21  
22  
23  
24  
25  
26  
27  
28  
29  
30  
31  
32  
33  
34  
35  
36  
37  
38  
39  
40  
41  
42  
43  
44  
45  
46  
47  
48  
49  
50  
51  
52  
53  
54  
55  
56  
57  
58  
59  
60

523 impact of performing preoperative LL-BFRE on the postoperative outcome regardless of the  
524 external variable that can hamper the results. Secondly, the discharge criteria at Horsens Regional  
525 Hospital and Silkeborg Regional Hospital withhold slight differences. That is, the acceptable knee  
526 joint ROM at discharge differs between the sites, thus it can be speculated that more patients from  
527 Silkeborg Regional Hospital will be offered a postoperative, supervised rehabilitation program. This  
528 might affect the number of patient receiving supervised physiotherapy after discharge between sites.  
529 However, all patients included in present project will report whether they have received  
530 postoperative supervised physiotherapy at all follow-up assessment. Thus, we will be able to  
531 determine (and normalize?) a potential between-site difference in patients receiving supervised  
532 physiotherapy after TKR.

#### 534 **Author contributions**

535 SLJ, PAA, MBB, and IM were all part of designing the trial and approved the final version of the  
536 protocol. Also, SLJ, PAA, MBB, and IM wrote and revised the protocol.

#### 538 **Data statement**

539 All obtained data will be stored in anonymized form at the Danish National Archives and deleted  
540 after 10 years.

#### 542 **Funding**

543 This work trial is supported by Aase og Ejnar Danielsens Foundation (100.000 dkk), Nis-Hanssens  
544 Mindeslegat (163.883 dkk) and The Foundation for health research of Central Denmark Region  
545 (99.658 dkk), Hede-Nielsen Foundation (8.000,00 dkk).

1  
2  
3  
4 547 **Competing interest**

5  
6  
7 548 None to be declared

8  
9 549

10  
11 550 **Ethics approval**

12  
13  
14 551 The trial has been accepted by Central Denmark Region Committee on Biomedical Research Ethics  
15  
16 552 (Journal No 10-72-19-19) and by The Danish Data Protection Agency (Reference No 652164).

17  
18 553

19  
20 554 **Word count**

21  
22  
23 555 5.650 words

24  
25 556

26

27

28

29

30

31

32

33

34

35

36

37

38

39

40

41

42

43

44

45

46

47

48

49

50

51

52

53

54

55

56

57

58

59

60

For peer review only

## REFERENCES

1. Ferraz RB, Gualano B, Rodrigues R, Kurimori CO, Fuller R, Lima FR, et al. Benefits of Resistance Training with Blood Flow Restriction in Knee Osteoarthritis. *Medicine and science in sports and exercise*. 2018.
2. Bade MJ, Kohrt WM, Stevens-Lapsley J. Outcomes before and after total knee arthroplasty compared to healthy adults. *The Journal of orthopaedic and sports physical therapy*. 2010.
3. Fransen M, McConnell S, Harmer AR, Van de, Simic M, Bennell KL. Exercise for osteoarthritis of the knee. 2015.
4. Skoffler B, Dalgas U, Mechlenburg I. Progressive resistance training before and after total hip and knee arthroplasty: A systematic review. 2015.
5. Sundhedsstyrelsen. Knæartrose - nationale kliniske retningslinjer og faglige visitationsretningslinjer 2012.
6. Franz A, Queitsch FP, Behringer M, Mayer C, Krauspe R, Zilkens C. Blood flow restriction training as a prehabilitation concept in total knee arthroplasty: A narrative review about current preoperative interventions and the potential impact of BFR. *Medical hypotheses*. 2018.
7. Calatayud J, Casaña J, Ezzatvar Y, Jakobsen MD, Sundstrup E, Andersen LL. High-intensity preoperative training improves physical and functional recovery in the early post-operative periods after total knee arthroplasty: a randomized controlled trial. *Knee surgery, sports traumatology, arthroscopy : official journal of the ESSKA*. 2016.
8. Skoffler B, Maribo T, Mechlenburg I, Hansen PM, Søballe K, Dalgas U. Efficacy of Preoperative Progressive Resistance Training on Postoperative Outcomes in Patients Undergoing Total Knee Arthroplasty. *Arthritis Care & Research*. 2016.
9. Bryk FF, dos Reis AC, Fingerhut D, Araujo T, Schutzer M, Cury RdPL, et al. Exercises with partial vascular occlusion in patients with knee osteoarthritis: a randomized clinical trial. *Knee Surgery, Sports Traumatology, Arthroscopy*. 2016;24(5):1580-6.
10. Wang L, Lee M, Zhang Z, Moodie J, Cheng D, Martin J. Does preoperative rehabilitation for patients planning to undergo joint replacement surgery improve outcomes? A systematic review and meta-analysis of randomised controlled trials. *BMJ open*. 2016;6(2):e009857-2015-.
11. Chesham RA, Shanmugam S. Does preoperative physiotherapy improve postoperative, patient-based outcomes in older adults who have undergone total knee arthroplasty? A systematic review. 2017.
12. Kwok IH, Paton B, Haddad FS. Does Pre-Operative Physiotherapy Improve Outcomes in Primary Total Knee Arthroplasty? - A Systematic Review. *The Journal of arthroplasty*. 2015;30(9):1657-63.
13. Hughes L, Paton B, Rosenblatt B, Gissane C, Patterson SD. Blood flow restriction training in clinical musculoskeletal rehabilitation: A systematic review and meta-analysis. 2017.
14. Counts BRDSJBBEKDGMJAKMTRSATBMGLJP. Influence of Relative Blood Flow Restriction Pressure on Muscle Activation and Muscle Adaptation. *Muscle & nerve*. 2016;53:438-45.
15. Kim D, Loenneke JP, Ye X, Bembien DA, Beck TW, Larson RD, et al. Low-load resistance training with low relative pressure produces muscular changes similar to high-load resistance training. *Muscle & nerve*. 2017;56(6):E126-E33.
16. Loenneke JP, Fahs CA, Rossow LM, Sherk VD, Thiebaud RS, Abe T, et al. Effects of cuff width on arterial occlusion: implications for blood flow restricted exercise. *European journal of applied physiology*. 2012;112(8):2903-12.

1  
2  
3  
4  
5  
6  
7  
8  
9  
10  
11  
12  
13  
14  
15  
16  
17  
18  
19  
20  
21  
22  
23  
24  
25  
26  
27  
28  
29  
30  
31  
32  
33  
34  
35  
36  
37  
38  
39  
40  
41  
42  
43  
44  
45  
46  
47  
48  
49  
50  
51  
52  
53  
54  
55  
56  
57  
58  
59  
60

17. Loenneke JP, Kim D, Fahs CA, Thiebaud RS, Abe T, Larson RD, et al. The influence of exercise load with and without different levels of blood flow restriction on acute changes in muscle thickness and lactate. *Clinical Physiology and Functional Imaging*. 2017.
18. Loenneke JP, Kim D, Fahs CA, Thiebaud RS, Abe T, Larson RD, et al. Effects of exercise with and without different degrees of blood flow restriction on torque and muscle activation. *Muscle & nerve*. 2015.
19. Loenneke JP, Thrower AD, Balapur A, Barnes JT, Pujol TJ. Blood flow-restricted walking does not result in an accumulation of metabolites. *Clinical physiology and functional imaging*. 2012;32(1):80-2.
20. Loenneke JP, Wilson JM, Balapur A, Thrower AD, Barnes JT, Pujol TJ. Time under tension decreased with blood flow-restricted exercise. *Clinical physiology and functional imaging*. 2012;32(4):268-73.
21. Loenneke JP, Wilson JM, Wilson GJ, Pujol TJ, Bembem MG. Potential safety issues with blood flow restriction training. 2011. p. 510-8.
22. Loenneke JP, Young KC, Fahs CA, Rossow LM, Bembem DA, Bembem MG. Blood flow restriction: rationale for improving bone. *Medical hypotheses*. 2012;78(4):523-7.
23. Ozaki H, Loenneke JP, Abe T. Blood flow-restricted walking in older women: does the acute hormonal response associate with muscle hypertrophy? *Clinical physiology and functional imaging*. 2017;37(4):379-83.
24. Ozaki H, Loenneke JP, Thiebaud RS, Stager JM, Abe T. Possibility of leg muscle hypertrophy by ambulation in older adults: a brief review. *Clinical interventions in aging*. 2013;8:369-75.
25. Scott BR, Loenneke JP, Slattery KM, Dascombe BJ. Blood flow restricted exercise for athletes: A review of available evidence. *Journal of science and medicine in sport*. 2016;19(5):360-7.
26. Scott BR, Loenneke JP, Slattery KM, Dascombe BJ. Exercise with blood flow restriction: an updated evidence-based approach for enhanced muscular development. *Sports medicine (Auckland, NZ)*. 2015;45(3):313-25.
27. Takarada Y, Nakamura Y, Aruga S, Onda T, Miyazaki S, Ishii N. Rapid increase in plasma growth hormone after low-intensity resistance exercise with vascular occlusion. *Journal of applied physiology (Bethesda, Md: 1985)*. 2000;88(1):61-5.
28. Takarada Y, Sato Y, Ishii N. Effects of resistance exercise combined with vascular occlusion on muscle function in athletes. *European journal of applied physiology*. 2002;86:308-14.
29. Takarada Y, Takazawa H, Ishii N. Applications of vascular occlusion diminish disuse atrophy of knee extensor muscles. *Medicine and science in sports and exercise*. 2000;32(12):2035-9.
30. Jørgensen AN, Aagaard P, Nielsen JL, Frandsen U, Diederichsen LP. Effects of blood-flow-restricted resistance training on muscle function in a 74-year-old male with sporadic inclusion body myositis: a case report. *Clinical Physiology and Functional Imaging*. 2016;36(6):504-9.
31. Nielsen JL, Aagaard P, Bech RD, Nygaard T, Hvid LG, Wernbom M, et al. Proliferation of myogenic stem cells in human skeletal muscle in response to low-load resistance training with blood flow restriction. *The Journal of physiology*. 2012;590(17):4351-61.
32. Nielsen JL, Aagaard P, Prokhorova TA, Nygaard T, Bech RD, Suetta C, et al. Blood-flow restricted training leads to myocellular macrophage infiltration and upregulation of heat-shock proteins, but no apparent muscle damage. *The Journal of physiology*. 2017;14:4857-73.

- 1  
2  
3  
4 651 33. Segal N, Davis MD, Mikesky AE. Efficacy of Blood Flow-Restricted Low-Load  
5 652 Resistance Training For Quadriceps Strengthening in Men at Risk of Symptomatic Knee  
6 653 Osteoarthritis. *Geriatric orthopaedic surgery & rehabilitation*. 2015;6(3):160-7.  
8 654 34. Segal NA, Williams GN, Davis MC, Wallace RB, Mikesky AE. Efficacy of blood  
9 655 flow-restricted, low-load resistance training in women with risk factors for symptomatic knee  
10 656 osteoarthritis. *PM & R : the journal of injury, function, and rehabilitation*. 2015;7(4):376-84.  
11 657 35. Mauro A. Satellite cell of skeletal muscle fibers. *The Journal of biophysical and*  
12 658 *biochemical cytology*. 1961.  
13 659 36. Kadi F, Charifi N, Denis C, Lexell J. Satellite cells and myonuclei in young and  
14 660 elderly women and men. *Muscle and Nerve*. 2004.  
16 661 37. Olsen S, Aagaard P, Kadi F, Tufekovic G, Verney J, Olesen JL, et al. Creatine  
17 662 supplementation augments the increase in satellite cell and myonuclei number in human skeletal  
18 663 muscle induced by strength training. *Journal of Physiology*. 2006.  
19 664 38. Francaux M, Deldicque L. Exercise and the control of muscle mass in human.  
20 665 *Pflügers Archiv - European Journal of Physiology*. 2018.  
22 666 39. Kadi F, Schjerling P, Andersen LL, Charifi N, Madsen J, Christensen LR, et al. The  
23 667 effects of heavy resistance training and detraining on satellite cells in human skeletal muscles. *The*  
24 668 *Journal of physiology*. 2004.  
25 669 40. Bazgir B, Fathi R, Valojerdi MR, Mozdziak P, Asgari A. Satellite cells contribution to  
26 670 exercise mediated muscle hypertrophy and repair. 2016.  
27 671 41. Covinsky KE, Lindquist K, Dunlop DD, Gill TM, Yelin E. Effect of arthritis in  
28 672 middle age on older-age functioning. *Journal of the American Geriatrics Society*. 2008;56(1):23-8.  
30 673 42. Bruusgaard JC, Johansen IB, Egnér IM, Rana ZA, Gundersen K. Myonuclei acquired  
31 674 by overload exercise precede hypertrophy and are not lost on detraining. *Proceedings of the*  
32 675 *National Academy of Sciences*. 2010.  
33 676 43. Moher D, Hopewell S, Schulz KF, Montori V, Gotzsche PC, Devereaux PJ, et al.  
34 677 CONSORT 2010 explanation and elaboration: updated guidelines for reporting parallel group  
35 678 randomised trials. *International journal of surgery (London, England)*. 2012;10(1):28-55.  
36 679 44. M B. Knæalloplastik - fysioterapeutisk instruks [https://e-](https://e-dok.rm.dk/edok/admin/GUI.nsf/Desktop.html?Open&login)  
38 680 [dok.rm.dk/edok/admin/GUI.nsf/Desktop.html?Open&login](https://e-dok.rm.dk/edok/admin/GUI.nsf/Desktop.html?Open&login); e-dok; 2019 [updated 03.04.19. 4:[1].  
39 681 45. Suetta C, Andersen JL, Dalgas U, Berget J, Koskinen S, Aagaard P, et al. Resistance  
40 682 training induces qualitative changes in muscle morphology, muscle architecture, and muscle  
41 683 function in elderly postoperative patients. *Journal of applied physiology (Bethesda, Md: 1985)*.  
42 684 2008;105(1):180-6.  
43 685 46. Wright AA, Cook CE, Baxter GD, Dockerty JD, Abbott JH. A comparison of 3  
44 686 methodological approaches to defining major clinically important improvement of 4 performance  
45 687 measures in patients with hip osteoarthritis. *The Journal of orthopaedic and sports physical therapy*.  
47 688 2011;41(5):319-27.  
48 689 47. Bloch ML, Jonsson LR, Kristensen MT. Introducing a Third Timed Up & Go Test  
49 690 Trial Improves Performances of Hospitalized and Community-Dwelling Older Individuals. *Journal*  
50 691 *of geriatric physical therapy (2001)*. 2017;40(3):121-6.  
51 692 48. Alghadir A, Anwer S, Brismée J-m. The reliability and minimal detectable change of  
52 693 Timed Up and Go test in individuals with grade 1-3 knee osteoarthritis. *BMC musculoskeletal*  
54 694 *disorders*. 2015.  
55 695 49. C N, V.A.B S, Y L, I K, M VDH, R.H.H E, et al. Reliability of hand-held  
56 696 dynamometry in patients awaiting total knee arthroplasty. *Physiotherapy (United Kingdom)*. 2011.  
57 697 50. Koblbauer IFH, Lambrecht Y, Van DH, Neeter C, Engelbert RHH, Poolman RW, et  
58 698 al. Reliability of maximal isometric knee strength testing with modified hand-held dynamometry in  
59 699  
60

1  
2  
3  
4  
5  
6  
7  
8  
9  
10  
11  
12  
13  
14  
15  
16  
17  
18  
19  
20  
21  
22  
23  
24  
25  
26  
27  
28  
29  
30  
31  
32  
33  
34  
35  
36  
37  
38  
39  
40  
41  
42  
43  
44  
45  
46  
47  
48  
49  
50  
51  
52  
53  
54  
55  
56  
57  
58  
59  
60

patients awaiting total knee arthroplasty: Useful in research and individual patient settings? A reliability study. *BMC Musculoskeletal Disorders*. 2011.

51. Aagaard P, Andersen JL, Dyhre-Poulsen P, Leffers AM, Wagner A, Peter Magnusson S, et al. A mechanism for increased contractile strength of human pennate muscle in response to strength training: Changes in muscle architecture. *Journal of Physiology*. 2001;534(2):613-23.

52. Lyman S, Lee YY, McLawhorn AS, Islam W, MacLean CH. What Are the Minimal and Substantial Improvements in the HOOS and KOOS and JR Versions After Total Joint Replacement? *Clinical orthopaedics and related research*. 2018;476(12):2432-41.

53. Roos EM, Lohmander LS. The Knee injury and Osteoarthritis Outcome Score (KOOS): From joint injury to osteoarthritis. 2003.

54. Wittrup-Jensen KU, Lauridsen J, Gudex C, Pedersen KM. Generation of a Danish TTO value set for EQ-5D health states. *Scandinavian Journal of Public Health*. 2009;37(5):459-66.

55. Hawker GA, Mian S, Kendzerska T, French M. Measures of adult pain: Visual Analog Scale for Pain (VAS Pain), Numeric Rating Scale for Pain (NRS Pain), McGill Pain Questionnaire (MPQ), Short-Form McGill Pain Questionnaire (SF-MPQ), Chronic Pain Grade Scale (CPGS), Short Form-36 Bodily Pain Scale (SF-36 BPS), and Measure of Intermittent and Constant Osteoarthritis Pain (ICOAP). *Arthritis care & research*. 2011;63 Suppl 11:S240-52.

56. Gill S, McBurney H. Reliability of performance-based measures in people awaiting joint replacement surgery of the hip or knee. *Physiotherapy Research International : The Journal for Researchers and Clinicians in Physical Therapy*. 2008;13(3):141-52.

57. Jones CJ, Rikli RE, Beam WC. A 30-s chair-stand test as a measure of lower body strength in community-residing older adults. *Research quarterly for exercise and sport*. 1999;70(2):113-9.

58. Kristensen MT, Ekdahl C, Kehlet H, Bandholm T. How many trials are needed to achieve performance stability of the Timed Up & Go test in patients with hip fracture? *Archives of Physical Medicine and Rehabilitation*. 2010;91(6):885-9.

59. Hansen H. RM-testmanal. *Danish Physiotherapy Society: Danish Physiotherapy Society*; 2012. p. 2.

60. Ekblom B. The muscle biopsy technique. Historical and methodological considerations. *Scandinavian Journal of Medicine & Science in Sports*. 2017;27(5):458-61.

61. Bergstrom J. Muscle electrolytes in man determined by neutron activation analysis on needle biopsy specimens. *Scandinavian Journal of Clinical and Laboratory Investigation (England)*. 1962;14(Suppl 68).

62. Nilsson AK, Lohmander LS, Klassbo M, Roos EM. Hip disability and osteoarthritis outcome score (HOOS)--validity and responsiveness in total hip replacement. *BMC musculoskeletal disorders*. 2003;4:10-2474-4-10. Epub 003 May 30.

63. Collins NJ, Prinsen CA, Christensen R, Bartels EM, Terwee CB, Roos EM. Knee Injury and Osteoarthritis Outcome Score (KOOS): systematic review and meta-analysis of measurement properties. *Osteoarthritis and cartilage*. 2016;24(8):1317-29.

64. Herdman M, Gudex C, Lloyd A, Janssen M, Kind P, Parkin D, et al. Development and preliminary testing of the new five-level version of EQ-5D (EQ-5D-5L). *Quality of life research : an international journal of quality of life aspects of treatment, care and rehabilitation*. 2011;20(10):1727-36.

65. Bilbao A, Garcia-Perez L, Arenaza JC, Garcia I, Ariza-Cardiel G, Trujillo-Martin E, et al. Psychometric properties of the EQ-5D-5L in patients with hip or knee osteoarthritis: reliability, validity and responsiveness. *Quality of life research : an international journal of quality of life aspects of treatment, care and rehabilitation*. 2018;27(11):2897-908.



- 1  
2  
3  
4 746 66. Buchholz I, Janssen MF, Kohlmann T, Feng YS. A Systematic Review of Studies  
5 747 Comparing the Measurement Properties of the Three-Level and Five-Level Versions of the EQ-5D.  
6 748 *Pharmacoeconomics*. 2018;36(6):645-61.
- 8 749 67. Jakobsen TL, Christensen M, Christensen SS, Olsen M, Bandholm T. Reliability of  
9 750 knee joint range of motion and circumference measurements after total knee arthroplasty: does  
10 751 tester experience matter? *Physiotherapy Research International*. 2010;15(3):126-34.
- 11 752 68. Christensen R, Bliddal H, Henriksen M. Enhancing the reporting and transparency of  
12 753 rheumatology research: a guide to reporting guidelines. *Arthritis research & therapy*.  
13 754 2013;15(1):109.
- 15 755 69. Malcata RM, Hopkins WG, Pearson SN. Tracking career performance of successful  
16 756 triathletes. *Medicine and science in sports and exercise*. 2014;46(6):1227-34.
- 17 757 70. Grapar Zargi T, Drobnic M, Jkoder J, Strazar K, Kacin A. The effects of  
18 758 preconditioning with ischemic exercise on quadriceps femoris muscle atrophy following anterior  
19 759 cruciate ligament reconstruction: a quasi-randomized controlled trial. *European journal of physical  
20 760 and rehabilitation medicine*. 2016;52(3):310-20.
- 22 761 71. Zargi T, Drobnic M, Strazar K, Kacin A. Short-Term Preconditioning With Blood  
23 762 Flow Restricted Exercise Preserves Quadriceps Muscle Endurance in Patients After Anterior  
24 763 Cruciate Ligament Reconstruction. *Frontiers in physiology*. 2018;9:1150.
- 25 764 72. Patterson SD, Hughes L, Warmington S, Burr J, Scott BR, Owens J, et al. Blood Flow  
26 765 Restriction Exercise Position Stand: Considerations of Methodology, Application, and Safety.  
27 766 *Frontiers in physiology*. 2019;10:533.
- 28 767 73. Andersen J, Aagaard P. Myosin heavy chain IIX overshoot in human skeletal muscle.  
29 768 *Muscle & nerve*. 2000;23:1095-104.
- 31 769 74. Malm C, Nyberg P, Engstrom M, Sjodin B, Lenkei R, Ekblom B, et al.  
32 770 Immunological changes in human skeletal muscle and blood after eccentric exercise and multiple  
33 771 biopsies. *The Journal of physiology*. 2000;529 Pt 1:243-62.
- 34 772  
35  
36  
37 773  
38  
39  
40  
41  
42  
43  
44  
45  
46  
47  
48  
49  
50  
51  
52  
53  
54  
55  
56  
57  
58  
59  
60

774 *Table 1. Exercise variables for the blood-flow restricted exercise (BFRE) protocol*

| Exercise variable                                 | Week 1-8                                                                                                 |
|---------------------------------------------------|----------------------------------------------------------------------------------------------------------|
| Level of LOP                                      | 60% LOP                                                                                                  |
| Sets                                              | 4                                                                                                        |
| Load intensity                                    | 30% 1RM                                                                                                  |
| Repetitions 1 <sup>st</sup> set                   | 30                                                                                                       |
| Repetitions 2 <sup>nd</sup> & 3 <sup>rd</sup> set | 15                                                                                                       |
| Repetitions 4 <sup>th</sup> set                   | To volitional failure                                                                                    |
| Contraction modes per repetition                  |                                                                                                          |
| Concentric                                        | 2 seconds                                                                                                |
| Isometric                                         | 0 seconds                                                                                                |
| Eccentric                                         | 2 seconds                                                                                                |
| Rest between repetitions                          | 0 seconds                                                                                                |
| Time under tension per repetition                 | 4 seconds                                                                                                |
| Range of movement                                 | maximum                                                                                                  |
| Rest between sets                                 | 30 seconds                                                                                               |
| Rest between sessions                             | ≥36 hours                                                                                                |
| Progression                                       | The minimal possible load (5 kilo) is added when patients perform >15 repetitions in 4 <sup>th</sup> set |

775

776 *Table 2. Outcome measures to be collected.*

| Outcome measures                                        | Data collection instrument                   | Time-points of assessment      |
|---------------------------------------------------------|----------------------------------------------|--------------------------------|
| <b>Primary outcome</b>                                  |                                              |                                |
| <b>Sit-to-stand function</b>                            | 30 seconds chair stand test                  | B, S, 3 and 12 months          |
| <b>Secondary outcomes</b>                               |                                              |                                |
| <b>Isometric Knee extensor muscle strength</b>          | Handheld Dynamometer                         | B, S, 3 and 12 months          |
| <b>Isometric Knee flexion muscle strength</b>           | Handheld Dynamometer                         | B, S, 3 and 12 months          |
| <b>Gait speed</b>                                       | 4x10-meter walk test                         | B, S, 3 and 12 months          |
| <b>Ambulatory capacity</b>                              | Timed Up & Go                                | B, S, 3 and 12 months          |
| <b>Muscle morphology and biology</b>                    | Muscle Biopsies                              | B, D, 3 months                 |
| <b>Pain</b>                                             | KOOS                                         | B, S, 6 weeks, 3 and 12 months |
| <b>Symptoms</b>                                         | KOOS                                         | B, S, 6 weeks, 3 and 12 months |
| <b>Activities of daily living</b>                       | KOOS                                         | B, S, 6 weeks, 3 and 12 months |
| <b>Sports &amp; Recreation</b>                          | KOOS                                         | B, S, 6 weeks, 3 and 12 months |
| <b>Quality of life</b>                                  | KOOS                                         | B, S, 6 weeks, 3 and 12 months |
| <b>Socioeconomic costs</b>                              | EQ-5D                                        | B, S, 6 weeks, 3 and 12 months |
| <b>Adverse Events</b>                                   | Questionnaire and medical records            | S, 3 months                    |
| <b>Patient characteristics and related measurements</b> |                                              |                                |
| <b>Gender</b>                                           | Questionnaire                                | B                              |
| <b>Age</b>                                              | Questionnaire                                | B                              |
| <b>Height</b>                                           | Tape measure                                 | B                              |
| <b>Body mass</b>                                        | Electronic body mass scale                   | B                              |
| <b>Civil Status</b>                                     | Questionnaire                                | B                              |
| <b>Educational Level</b>                                | Questionnaire                                | B                              |
| <b>Employment Status</b>                                | Questionnaire                                | B                              |
| <b>Substance Use (alcohol, smoking)</b>                 | Questionnaire                                | B                              |
| <b>Duration of knee symptoms</b>                        | Questionnaire                                | B                              |
| <b>Pain medication during the last week</b>             | Questionnaire                                | B                              |
| <b>Co-morbidities</b>                                   | Questionnaire                                | B                              |
| <b>Blood pressure</b>                                   | Electronic upper limb blood pressure monitor | At doctor's visit              |

|    |                                               |                                             |                                |
|----|-----------------------------------------------|---------------------------------------------|--------------------------------|
| 1  |                                               |                                             |                                |
| 2  |                                               |                                             |                                |
| 3  |                                               |                                             |                                |
| 4  | <b>Postoperative supervised physiotherapy</b> | Questionnaire                               | 6 weeks, 3 and 12 months       |
| 5  | <b>Exercise compliance and progression</b>    | Physiotherapist records                     | B, S, at each BBFRE session, 3 |
| 6  | <b>NRS Pain</b>                               | PhD-stipendiate and physiotherapist records | and 12 months                  |
| 7  |                                               |                                             |                                |
| 8  |                                               |                                             |                                |
| 9  |                                               |                                             |                                |
| 10 | 777                                           |                                             |                                |
| 11 |                                               |                                             |                                |
| 12 |                                               |                                             |                                |
| 13 |                                               |                                             |                                |
| 14 |                                               |                                             |                                |
| 15 |                                               |                                             |                                |
| 16 |                                               |                                             |                                |
| 17 |                                               |                                             |                                |
| 18 |                                               |                                             |                                |
| 19 |                                               |                                             |                                |
| 20 |                                               |                                             |                                |
| 21 |                                               |                                             |                                |
| 22 |                                               |                                             |                                |
| 23 |                                               |                                             |                                |
| 24 |                                               |                                             |                                |
| 25 |                                               |                                             |                                |
| 26 |                                               |                                             |                                |
| 27 |                                               |                                             |                                |
| 28 |                                               |                                             |                                |
| 29 |                                               |                                             |                                |
| 30 |                                               |                                             |                                |
| 31 |                                               |                                             |                                |
| 32 |                                               |                                             |                                |
| 33 |                                               |                                             |                                |
| 34 |                                               |                                             |                                |
| 35 |                                               |                                             |                                |
| 36 |                                               |                                             |                                |
| 37 |                                               |                                             |                                |
| 38 |                                               |                                             |                                |
| 39 |                                               |                                             |                                |
| 40 |                                               |                                             |                                |
| 41 |                                               |                                             |                                |
| 42 |                                               |                                             |                                |
| 43 |                                               |                                             |                                |
| 44 |                                               |                                             |                                |
| 45 |                                               |                                             |                                |
| 46 |                                               |                                             |                                |
| 47 |                                               |                                             |                                |
| 48 |                                               |                                             |                                |
| 49 |                                               |                                             |                                |
| 50 |                                               |                                             |                                |
| 51 |                                               |                                             |                                |
| 52 |                                               |                                             |                                |
| 53 |                                               |                                             |                                |
| 54 |                                               |                                             |                                |
| 55 |                                               |                                             |                                |
| 56 |                                               |                                             |                                |
| 57 |                                               |                                             |                                |
| 58 |                                               |                                             |                                |
| 59 |                                               |                                             |                                |
| 60 |                                               |                                             |                                |

For peer review only

Figure 1. Patient flow

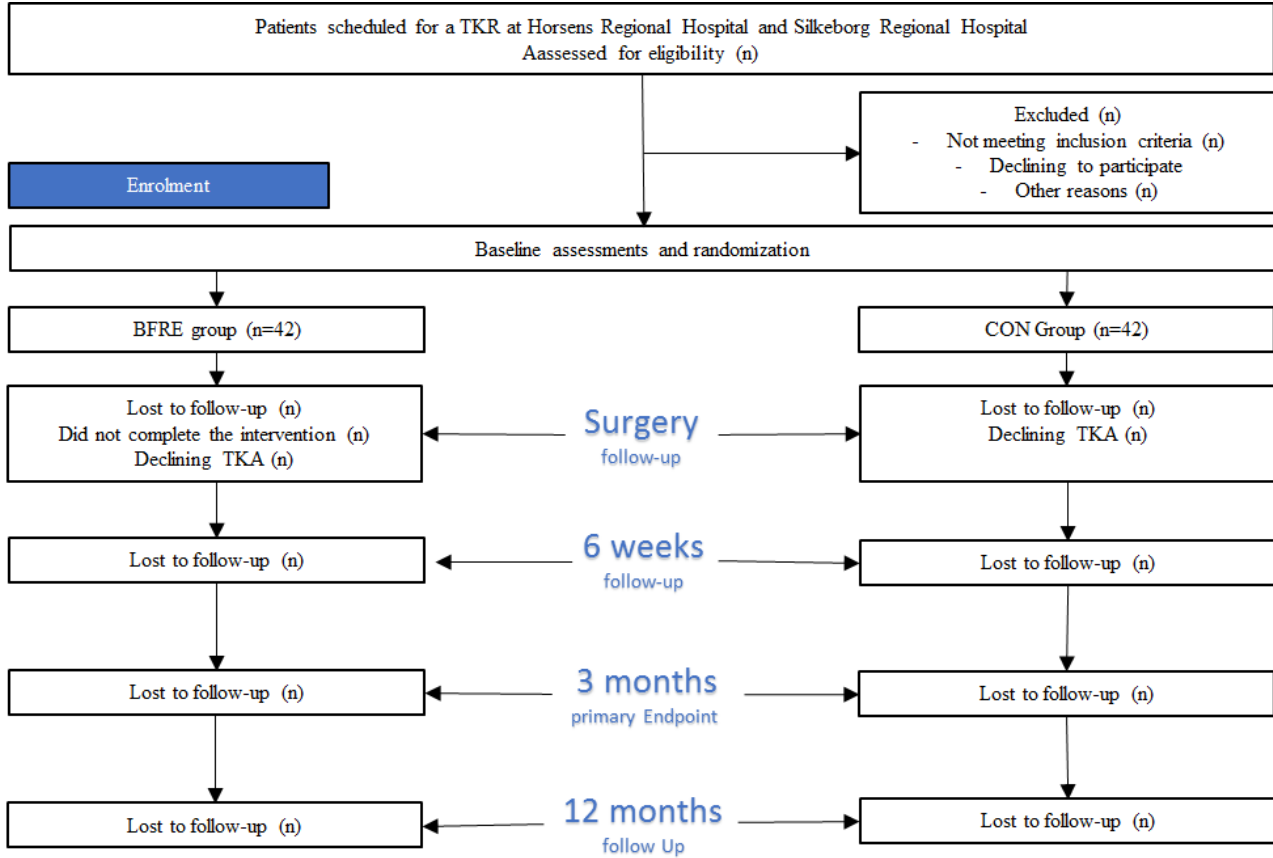

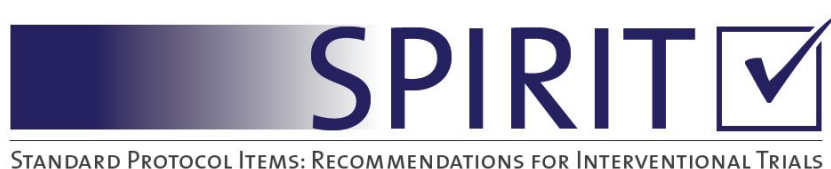

SPIRIT 2013 Checklist: Recommended items to address in a clinical trial protocol and related documents\*

| Section/item                                                    | Item No              | Description                                                                                                                                                                                                                                                                                                                                                                                                                                                                                                                                                                                                                                                                   |
|-----------------------------------------------------------------|----------------------|-------------------------------------------------------------------------------------------------------------------------------------------------------------------------------------------------------------------------------------------------------------------------------------------------------------------------------------------------------------------------------------------------------------------------------------------------------------------------------------------------------------------------------------------------------------------------------------------------------------------------------------------------------------------------------|
| <b>Administrative information</b>                               |                      |                                                                                                                                                                                                                                                                                                                                                                                                                                                                                                                                                                                                                                                                               |
| Title (p 1, I 1-3)                                              | 1                    | Descriptive title identifying the study design, population, interventions, and, if applicable, trial acronym                                                                                                                                                                                                                                                                                                                                                                                                                                                                                                                                                                  |
| Trial registration<br>A: p 2, I 56-57<br>B:                     | 2a<br>2b             | Trial identifier and registry name. If not yet registered, name of intended registry<br>All items from the World Health Organization Trial Registration Data Set                                                                                                                                                                                                                                                                                                                                                                                                                                                                                                              |
| Protocol version<br>P 1, I 22                                   | 3                    | Date and version identifier                                                                                                                                                                                                                                                                                                                                                                                                                                                                                                                                                                                                                                                   |
| Funding<br>P 21, I 494-496                                      | 4                    | Sources and types of financial, material, and other support                                                                                                                                                                                                                                                                                                                                                                                                                                                                                                                                                                                                                   |
| Roles and responsibilities<br>A: P 1, I 5-11<br>B: P 1, I 15-20 | 5a<br>5b<br>5c<br>5d | Names, affiliations, and roles of protocol contributors<br>Name and contact information for the trial sponsor<br>Role of study sponsor and funders, if any, in study design; collection, management, analysis, and interpretation of data; writing of the report; and the decision to submit the report for publication, including whether they will have ultimate authority over any of these activities<br>Composition, roles, and responsibilities of the coordinating centre, steering committee, endpoint adjudication committee, data management team, and other individuals or groups overseeing the trial, if applicable (see Item 21a for data monitoring committee) |
| <b>Introduction</b>                                             |                      |                                                                                                                                                                                                                                                                                                                                                                                                                                                                                                                                                                                                                                                                               |
| Background and rationale<br>P 3, I 67-133<br>P 3, I 70-76       | 6a<br>6b             | Description of research question and justification for undertaking the trial, including summary of relevant studies (published and unpublished) examining benefits and harms for each intervention<br>Explanation for choice of comparators                                                                                                                                                                                                                                                                                                                                                                                                                                   |
| Objectives<br>P 5, I 129-136                                    | 7                    | Specific objectives or hypotheses                                                                                                                                                                                                                                                                                                                                                                                                                                                                                                                                                                                                                                             |
| Trial design<br>P6, I 140-145                                   | 8                    | Description of trial design including type of trial (eg, parallel group, crossover, factorial, single group), allocation ratio, and framework (eg, superiority, equivalence, noninferiority, exploratory)                                                                                                                                                                                                                                                                                                                                                                                                                                                                     |

1  
2  
3  
**Methods: Participants, interventions, and outcomes**

4  
5  
6  
7  
8  
9  
10  
11  
12  
13  
14  
15  
16  
17  
18  
19  
20  
21  
22  
23  
24  
25  
26  
27  
28  
29  
30  
31  
32  
33  
34  
35  
36  
37  
38  
39  
40  
41  
42  
43  
44  
45  
46  
47

|                                                          |     |                                                                                                                                                                                                                                                                                                                                                                                |
|----------------------------------------------------------|-----|--------------------------------------------------------------------------------------------------------------------------------------------------------------------------------------------------------------------------------------------------------------------------------------------------------------------------------------------------------------------------------|
| Study setting<br>P6, I 148-149                           | 9   | Description of study settings (eg, community clinic, academic hospital) and list of countries where data will be collected. Reference to where list of study sites can be obtained                                                                                                                                                                                             |
| Eligibility criteria<br>P6, I 155-163                    | 10  | Inclusion and exclusion criteria for participants. If applicable, eligibility criteria for study centres and individuals who will perform the interventions (eg, surgeons, psychotherapists)                                                                                                                                                                                   |
| Interventions<br>A: p7, I 164-240<br><br>C: p12, 283-285 | 11a | Interventions for each group with sufficient detail to allow replication, including how and when they will be administered                                                                                                                                                                                                                                                     |
|                                                          | 11b | Criteria for discontinuing or modifying allocated interventions for a given trial participant (eg, drug dose change in response to harms, participant request, or improving/worsening disease)                                                                                                                                                                                 |
|                                                          | 11c | Strategies to improve adherence to intervention protocols, and any procedures for monitoring adherence (eg, drug tablet return, laboratory tests)                                                                                                                                                                                                                              |
|                                                          | 11d | Relevant concomitant care and interventions that are permitted or prohibited during the trial                                                                                                                                                                                                                                                                                  |
| Outcomes<br>P 10, I 245-384                              | 12  | Primary, secondary, and other outcomes, including the specific measurement variable (eg, systolic blood pressure), analysis metric (eg, change from baseline, final value, time to event), method of aggregation (eg, median, proportion), and time point for each outcome. Explanation of the clinical relevance of chosen efficacy and harm outcomes is strongly recommended |
| Participant<br>timeline<br><br>Table 1                   | 13  | Time schedule of enrolment, interventions (including any run-ins and washouts), assessments, and visits for participants. A schematic diagram is highly recommended (see Figure)                                                                                                                                                                                               |
| Sample size<br>P 17, I 391-401                           | 14  | Estimated number of participants needed to achieve study objectives and how it was determined, including clinical and statistical assumptions supporting any sample size calculations                                                                                                                                                                                          |
| Recruitment<br>P 6, I 148-151                            | 15  | Strategies for achieving adequate participant enrolment to reach target sample size                                                                                                                                                                                                                                                                                            |

48  
49  
50  
**Methods: Assignment of interventions (for controlled trials)**

51  
52  
53  
54  
55  
56  
57  
58  
59  
60  
Allocation:

|                                         |     |                                                                                                                                                                                                                                                                                                                                                          |
|-----------------------------------------|-----|----------------------------------------------------------------------------------------------------------------------------------------------------------------------------------------------------------------------------------------------------------------------------------------------------------------------------------------------------------|
| Sequence<br>generation<br>P8, I 196-201 | 16a | Method of generating the allocation sequence (eg, computer-generated random numbers), and list of any factors for stratification. To reduce predictability of a random sequence, details of any planned restriction (eg, blocking) should be provided in a separate document that is unavailable to those who enrol participants or assign interventions |
|-----------------------------------------|-----|----------------------------------------------------------------------------------------------------------------------------------------------------------------------------------------------------------------------------------------------------------------------------------------------------------------------------------------------------------|

|    |                |     |                                                                         |
|----|----------------|-----|-------------------------------------------------------------------------|
| 1  |                |     |                                                                         |
| 2  | Allocation     | 16b | Mechanism of implementing the allocation sequence (eg, central          |
| 3  | concealment    |     | telephone; sequentially numbered, opaque, sealed envelopes),            |
| 4  | mechanism      |     | describing any steps to conceal the sequence until interventions are    |
| 5  | P8, I 196-201  |     | assigned                                                                |
| 6  |                |     |                                                                         |
| 7  | Implementation | 16c | Who will generate the allocation sequence, who will enrol participants, |
| 8  | P8, I 196-201  |     | and who will assign participants to interventions                       |
| 9  |                |     |                                                                         |
| 10 | Blinding       | 17a | Who will be blinded after assignment to interventions (eg, trial        |
| 11 | (masking)      |     | participants, care providers, outcome assessors, data analysts), and    |
| 12 | P8, I 200      |     | how                                                                     |
| 13 |                | 17b | If blinded, circumstances under which unblinding is permissible, and    |
| 14 |                |     | procedure for revealing a participant's allocated intervention during   |
| 15 |                |     | the trial                                                               |
| 16 |                |     |                                                                         |
| 17 |                |     |                                                                         |
| 18 |                |     |                                                                         |

### Methods: Data collection, management, and analysis

|    |                 |     |                                                                          |
|----|-----------------|-----|--------------------------------------------------------------------------|
| 19 |                 |     |                                                                          |
| 20 | Data collection | 18a | Plans for assessment and collection of outcome, baseline, and other      |
| 21 | methods         |     | trial data, including any related processes to promote data quality (eg, |
| 22 | P 10, I 245-420 |     | duplicate measurements, training of assessors) and a description of      |
| 23 |                 |     | study instruments (eg, questionnaires, laboratory tests) along with      |
| 24 |                 |     | their reliability and validity, if known. Reference to where data        |
| 25 |                 |     | collection forms can be found, if not in the protocol                    |
| 26 |                 | 18b | Plans to promote participant retention and complete follow-up,           |
| 27 |                 |     | including list of any outcome data to be collected for participants who  |
| 28 |                 |     | discontinue or deviate from intervention protocols                       |
| 29 |                 |     |                                                                          |
| 30 | Data            | 19  | Plans for data entry, coding, security, and storage, including any       |
| 31 | management      |     | related processes to promote data quality (eg, double data entry;        |
| 32 |                 |     | range checks for data values). Reference to where details of data        |
| 33 |                 |     | management procedures can be found, if not in the protocol               |
| 34 |                 |     |                                                                          |
| 35 | Statistical     | 20a | Statistical methods for analysing primary and secondary outcomes.        |
| 36 | methods         |     | Reference to where other details of the statistical analysis plan can be |
| 37 | P 17, I 400-420 |     | found, if not in the protocol                                            |
| 38 |                 | 20b | Methods for any additional analyses (eg, subgroup and adjusted           |
| 39 |                 |     | analyses)                                                                |
| 40 | P 17, I 400-420 | 20c | Definition of analysis population relating to protocol non-adherence     |
| 41 |                 |     | (eg, as randomised analysis), and any statistical methods to handle      |
| 42 |                 |     | missing data (eg, multiple imputation)                                   |
| 43 |                 |     |                                                                          |
| 44 |                 |     |                                                                          |
| 45 |                 |     |                                                                          |
| 46 |                 |     |                                                                          |
| 47 |                 |     |                                                                          |
| 48 |                 |     |                                                                          |

### Methods: Monitoring

|    |                 |     |                                                                      |
|----|-----------------|-----|----------------------------------------------------------------------|
| 49 |                 |     |                                                                      |
| 50 | Data monitoring | 21a | Composition of data monitoring committee (DMC); summary of its role  |
| 51 |                 |     | and reporting structure; statement of whether it is independent from |
| 52 |                 |     | the sponsor and competing interests; and reference to where further  |
| 53 |                 |     | details about its charter can be found, if not in the protocol.      |
| 54 |                 |     | Alternatively, an explanation of why a DMC is not needed             |
| 55 |                 |     |                                                                      |
| 56 |                 |     |                                                                      |
| 57 |                 |     |                                                                      |
| 58 |                 |     |                                                                      |
| 59 |                 |     |                                                                      |
| 60 |                 |     |                                                                      |

|    |          |     |                                                                        |
|----|----------|-----|------------------------------------------------------------------------|
| 1  |          |     |                                                                        |
| 2  |          | 21b | Description of any interim analyses and stopping guidelines, including |
| 3  |          |     | who will have access to these interim results and make the final       |
| 4  |          |     | decision to terminate the trial                                        |
| 5  |          |     |                                                                        |
| 6  | Harms    | 22  | Plans for collecting, assessing, reporting, and managing solicited and |
| 7  |          |     | spontaneously reported adverse events and other unintended effects     |
| 8  |          |     | of trial interventions or trial conduct                                |
| 9  |          |     |                                                                        |
| 10 | Auditing | 23  | Frequency and procedures for auditing trial conduct, if any, and       |
| 11 |          |     | whether the process will be independent from investigators and the     |
| 12 |          |     | sponsor                                                                |
| 13 |          |     |                                                                        |
| 14 |          |     |                                                                        |

### Ethics and dissemination

|    |                   |     |                                                                          |
|----|-------------------|-----|--------------------------------------------------------------------------|
| 15 |                   |     |                                                                          |
| 16 |                   |     |                                                                          |
| 17 | Research ethics   | 24  | Plans for seeking research ethics committee/institutional review board   |
| 18 | approval          |     | (REC/IRB) approval                                                       |
| 19 | P 18, I 423-424   |     |                                                                          |
| 20 |                   |     |                                                                          |
| 21 |                   |     |                                                                          |
| 22 | Protocol          | 25  | Plans for communicating important protocol modifications (eg,            |
| 23 | amendments        |     | changes to eligibility criteria, outcomes, analyses) to relevant parties |
| 24 |                   |     | (eg, investigators, REC/IRBs, trial participants, trial registries,      |
| 25 |                   |     | journals, regulators)                                                    |
| 26 |                   |     |                                                                          |
| 27 | Consent or assent | 26a | Who will obtain informed consent or assent from potential trial          |
| 28 | P7, I 164-173     |     | participants or authorised surrogates, and how (see Item 32)             |
| 29 |                   |     |                                                                          |
| 30 |                   | 26b | Additional consent provisions for collection and use of participant data |
| 31 |                   |     | and biological specimens in ancillary studies, if applicable             |
| 32 |                   |     |                                                                          |
| 33 |                   |     |                                                                          |
| 34 | Confidentiality   | 27  | How personal information about potential and enrolled participants will  |
| 35 | P 11, I 265-275   |     | be collected, shared, and maintained in order to protect confidentiality |
| 36 |                   |     | before, during, and after the trial                                      |
| 37 |                   |     |                                                                          |
| 38 | Declaration of    | 28  | Financial and other competing interests for principal investigators for  |
| 39 | interests         |     | the overall trial and each study site                                    |
| 40 | P 22, I 514       |     |                                                                          |
| 41 |                   |     |                                                                          |
| 42 |                   |     |                                                                          |
| 43 | Access to data    | 29  | Statement of who will have access to the final trial dataset, and        |
| 44 |                   |     | disclosure of contractual agreements that limit such access for          |
| 45 |                   |     | investigators                                                            |
| 46 |                   |     |                                                                          |
| 47 | Ancillary and     | 30  | Provisions, if any, for ancillary and post-trial care, and for           |
| 48 | post-trial care   |     | compensation to those who suffer harm from trial participation           |
| 49 |                   |     |                                                                          |
| 50 | Dissemination     | 31a | Plans for investigators and sponsor to communicate trial results to      |
| 51 | policy            |     | participants, healthcare professionals, the public, and other relevant   |
| 52 | P 18, 442-444     |     | groups (eg, via publication, reporting in results databases, or other    |
| 53 |                   |     | data sharing arrangements), including any publication restrictions       |
| 54 |                   |     |                                                                          |
| 55 |                   |     |                                                                          |
| 56 | P 21, I 501-502   | 31b | Authorship eligibility guidelines and any intended use of professional   |
| 57 |                   |     | writers                                                                  |
| 58 |                   |     |                                                                          |
| 59 |                   |     |                                                                          |
| 60 |                   |     |                                                                          |



- 1  
2 31c Plans, if any, for granting public access to the full protocol, participant-  
3 level dataset, and statistical code  
4

## 5 **Appendices**

- 6 Informed consent 32 Model consent form and other related documentation given to  
7 materials participants and authorised surrogates  
8  
9 Biological 33 Plans for collection, laboratory evaluation, and storage of biological  
10 specimens specimens for genetic or molecular analysis in the current trial and for  
11 future use in ancillary studies, if applicable  
12  
13

---

14 \*It is strongly recommended that this checklist be read in conjunction with the SPIRIT 2013  
15 Explanation & Elaboration for important clarification on the items. Amendments to the  
16 protocol should be tracked and dated. The SPIRIT checklist is copyrighted by the SPIRIT  
17 Group under the Creative Commons "[Attribution-NonCommercial-NoDerivs 3.0 Unported](#)"  
18 license.  
19  
20  
21  
22  
23  
24  
25  
26  
27  
28  
29  
30  
31  
32  
33  
34  
35  
36  
37  
38  
39  
40  
41  
42  
43  
44  
45  
46  
47  
48  
49  
50  
51  
52  
53  
54  
55  
56  
57  
58  
59  
60

# BMJ Open

**The efficacy of low-load blood flow restricted resistance EXercise in patients with Knee osteoarthritis scheduled for total knee replacement (EXKnee). Protocol for a multicenter, randomized controlled trial.**

|                                 |                                                                                                                                                                                                                                                                                                                                                                                                                    |
|---------------------------------|--------------------------------------------------------------------------------------------------------------------------------------------------------------------------------------------------------------------------------------------------------------------------------------------------------------------------------------------------------------------------------------------------------------------|
| Journal:                        | <i>BMJ Open</i>                                                                                                                                                                                                                                                                                                                                                                                                    |
| Manuscript ID                   | bmjopen-2019-034376.R2                                                                                                                                                                                                                                                                                                                                                                                             |
| Article Type:                   | Protocol                                                                                                                                                                                                                                                                                                                                                                                                           |
| Date Submitted by the Author:   | 11-May-2020                                                                                                                                                                                                                                                                                                                                                                                                        |
| Complete List of Authors:       | Jørgensen, Stian; Regional Hospital Horsens, Department of occupational and physical therapy; Horsens Sygehus, H-HIP<br>Bohn, Marie; Horsens Sygehus, Department of Orthopedic Surgery<br>Aagaard, Per; Institute for Sports Science and Clinical Biomechanics, University of Southern Denmark,<br>Mechlenburg, Inger; Aarhus University Hospital, Department of Orthopedics; Aarhus University, Clinical Medicine |
| <b>Primary Subject Heading</b>: | Sports and exercise medicine                                                                                                                                                                                                                                                                                                                                                                                       |
| Secondary Subject Heading:      | Rehabilitation medicine                                                                                                                                                                                                                                                                                                                                                                                            |
| Keywords:                       | blood flow restriction exercise, knee osteoarthritis, total knee replacement surgery, preconditioning, functional capacity                                                                                                                                                                                                                                                                                         |
|                                 |                                                                                                                                                                                                                                                                                                                                                                                                                    |

SCHOLARONE™  
Manuscripts



I, the Submitting Author has the right to grant and does grant on behalf of all authors of the Work (as defined in the below author licence), an exclusive licence and/or a non-exclusive licence for contributions from authors who are: i) UK Crown employees; ii) where BMJ has agreed a CC-BY licence shall apply, and/or iii) in accordance with the terms applicable for US Federal Government officers or employees acting as part of their official duties; on a worldwide, perpetual, irrevocable, royalty-free basis to BMJ Publishing Group Ltd ("BMJ") its licensees and where the relevant Journal is co-owned by BMJ to the co-owners of the Journal, to publish the Work in this journal and any other BMJ products and to exploit all rights, as set out in our [licence](#).

The Submitting Author accepts and understands that any supply made under these terms is made by BMJ to the Submitting Author unless you are acting as an employee on behalf of your employer or a postgraduate student of an affiliated institution which is paying any applicable article publishing charge ("APC") for Open Access articles. Where the Submitting Author wishes to make the Work available on an Open Access basis (and intends to pay the relevant APC), the terms of reuse of such Open Access shall be governed by a Creative Commons licence – details of these licences and which [Creative Commons](#) licence will apply to this Work are set out in our licence referred to above.

Other than as permitted in any relevant BMJ Author's Self Archiving Policies, I confirm this Work has not been accepted for publication elsewhere, is not being considered for publication elsewhere and does not duplicate material already published. I confirm all authors consent to publication of this Work and authorise the granting of this licence.

1  
2  
3  
4 1 **The efficacy of low-load blood flow restricted resistance EXercise in patients with Knee**  
5 **osteoarthritis scheduled for total knee replacement (EXKnee). Protocol for a multicenter**  
6 **randomized controlled trial.**  
7  
8 3  
9  
10 4

11 5 *Stian Langgård Jørgensen*<sup>1,2,5</sup>, *Marie Bagger Bohn*<sup>2</sup>, *Per Aagaard*<sup>3</sup>, *Inger Mechlenburg*<sup>4,5</sup>  
12  
13 6

14 7 <sup>1</sup>Department of Occupational and Physical Therapy, Horsens Regional Hospital, Denmark  
15

16 8 <sup>2</sup>H-HIP, Department of Orthopedic Surgery, Horsens Regional Hospital, Denmark  
17

18 9 <sup>3</sup>Department of Sports Science and Clinical Biomechanics, University of Southern Denmark  
19

20 10 <sup>4</sup> Department of Orthopedic Surgery, Aarhus University Hospital, Denmark  
21

22 11 <sup>5</sup>Department of Clinical Medicine, Aarhus University, Denmark  
23  
24  
25  
26  
27  
28  
29

15 Corresponding Author:

16 Name: PhD student Stian Langgård Jørgensen  
17

18 Address: Horsens Regional Hospital, Sundvej 30C, DK-8700 Horsens  
19

20 E-mail: [stiajo@rm.dk](mailto:stiajo@rm.dk)  
21  
22  
23  
24  
25  
26  
27  
28  
29  
30  
31  
32  
33  
34  
35  
36  
37  
38  
39  
40  
41  
42  
43  
44  
45  
46  
47  
48  
49  
50  
51  
52  
53  
54  
55  
56  
57  
58  
59  
60

20 Phone: +45 22 71 17 82

23 Word count: 5.650

## 25 **ABSTRACT**

### 26 **Introduction**

27 Up to 20% of patients undergoing total knee replacement (TKR) surgery report no or suboptimal  
28 pain relief after TKR. Moreover, despite chances of recovering to preoperative functional levels,  
29 patients receiving TKR have demonstrated persistent deficits in quadriceps strength and functional  
30 performance compared to healthy aged-matched adults. We intend to examine if low-load blood  
31 flow restricted exercise (BFRE) is an effective preoperative method to increase functional capacity,  
32 lower limb muscle strength and self-reported outcomes after TKR. In addition, the study aims to  
33 investigate to which extent preoperative BFRE will protect against surgery-related atrophy three  
34 months after TKR.

### 36 **Methods**

37 In this multicenter, randomized controlled and assessor blinded trial, 84 patients scheduled for TKR  
38 will be randomized to receive usual care and eight weeks of preoperative BFRE or to follow usual  
39 care-only. Data will be collected before randomization, three-four days prior to TKR, six weeks,  
40 three months, and 12 months after TKR. Primary outcome will be the change in 30-second chair  
41 stand test from baseline to three-month follow-up. Key secondary outcomes will be Timed Up &  
42 Go, 40-meter fast-paced walk test, isometric knee extensor and flexor strength, patient-reported  
43 outcome, and selected myofiber properties.

44 Intention-to-treat principle and per protocol analyses will be conducted. A one-way analysis of  
45 variance model will be used to analyze between group mean changes. Between-intervention  
46 comparison will be analyzed using a mixed linear model. Also, paired student t-tests will be  
47 performed and regression analysis will be used for analyzation of associations between selected  
48 outcomes.

1  
2  
3  
4 49  
56  
7 **50 Ethical approval**  
8

9 51 The trial has been accepted by the Central Denmark Region Committee on Biomedical Research  
10  
11 52 Ethics (Journal No 10-72-19-19) and the Danish Data Protection Agency (Journal No 652164). All  
12  
13 53 results will be published in international peer-reviewed scientific journals regardless of positive,  
14  
15 54 negative or inconclusive results.  
16  
17

18 55  
1920 **56 Trial registration**  
21

22  
23 57 The trial is registered at Clinical Trials (NCT04081493)  
24  
25 58

26  
27 **59 Article Summary**  
2829 **60 Strengths and limitations of this study**  
30

- 31  
32 61 • The trial is a multicenter, randomized controlled assessor blinded trial.  
33  
34 62 • This is the first clinical trial to investigate the effect of low-load ischemic resistance training  
35  
36 63 as a preconditioning method prior to elective knee replacement surgery.  
37  
38 64 • Patients will not be blinded to their allocation into intervention groups (BFR vs. control)  
39  
40 65 • This is a protocol paper  
41  
42  
43  
44 66

45  
46 **67 Key words**  
47

48 68 Blood flow restricted exercise, knee osteoarthritis, total knee replacement surgery, preconditioning  
49  
50  
51  
52  
53  
54  
55  
56  
57  
58  
59  
60

## 69 INTRODUCTION

70 Knee OA is a degenerative joint disease associated with pain, reduced physical activity, and quality  
71 of life and affects almost 40% of all individuals  $\geq 60$  years of age (1-5). Approaching end-stage knee  
72 OA, total knee replacement (TKR) is often the preferred treatment choice to reduce pain and regain  
73 functional capacity. That is, TKR is considered a highly successful treatment to improve quality of  
74 life and long-term function (6). However, despite being considered highly successful,  
75 approximately 20% of the patients undergoing TKR experience a suboptimal outcome (6), which  
76 has often been suggested to be related to incomplete restoration of physical function (7). In  
77 addition, TKR patients typically demonstrate long-lasting deficits in quadriceps strength and  
78 functional performance (2, 4). This failure to return to “normal” strength levels has been suggested  
79 to be associated with preoperatively lower limb muscle strength and function (2).

80 Preconditioning exercise designed to prepare the musculoskeletal system to better tolerate  
81 stressful events such as the impact of invasive surgery has been suggested to be applicable prior to  
82 elective TKR (6). This is supported by the results of two randomized controlled trials indicating that  
83 preoperative heavy resistance strength training (HRST) may enhance functional capacity and knee  
84 extensor muscle strength three months postoperatively (7, 8). Joint pain resulting from the high  
85 mechanical loads associated with HRST may represent a barrier to this type of training in some  
86 patients suffering from severe knee OA (1, 9). Therefore, a more tolerable, yet effective, alternative  
87 is needed for this population. Also, three recent systematic reviews investigating the topic of  
88 preoperative physiotherapy-based exercise before TKR all warrant high quality, well-powered  
89 evidence to investigate the efficacy of preoperative physiotherapy before TKR (10-12).

90 Resistance training with low exercise loads ( $\sim 30\%$  1 repetition maximum) performed with  
91 concurrent partial blood flow restriction to the working limb (Blood flow restricted exercise: BFRE)  
92 has received increasing clinical interest during the last decade (1, 13-32). The application of low

1  
2  
3  
4  
5  
6  
7  
8  
9  
10  
11  
12  
13  
14  
15  
16  
17  
18  
19  
20  
21  
22  
23  
24  
25  
26  
27  
28  
29  
30  
31  
32  
33  
34  
35  
36  
37  
38  
39  
40  
41  
42  
43  
44  
45  
46  
47  
48  
49  
50  
51  
52  
53  
54  
55  
56  
57  
58  
59  
60

muscle/tendon/joint forces in BFRE has been documented to increase human skeletal muscle size and to cause substantial strength gain in healthy young and old individuals, as well as some patient populations, despite the low magnitude of mechanical stress imposed on the trained tissue (13, 25, 26). When applied in the clinical setting, BFRE has demonstrated positive effects on skeletal muscle hypertrophy, strength, and functional capacity in mild-degree knee OA patients (1, 9, 33, 34) although not observed in all studies (33). Importantly, BFRE appears to be feasible with a high training adherence in knee OA patients (1, 33, 34). The use of different restrictive pressures (absolute restrictive pressures: 160-200 mmHg and individualized pressure of 70%; the pressure needed to provide complete blood flow restriction (total limb occlusion pressure: LOP) has been applied without any adverse events in mild-degree knee OA (1, 33, 34). This is in line with Hughes et al. (13), who suggested that when BFRE is performed correctly, it has been demonstrated to be as safe as free-flow exercise methods (13). Currently, no consensus exists about the appropriate restrictive pressure to induce favorable muscle adaptation in patients suffering from knee OA. This might be due to the fact that the effective occlusion pressure seems to be dictated by the exercise load/intensity (35). Thus, the effective occlusion pressure varies between studies due to use of different exercises or differences in exercise load and intensity. Restrictive pressures ranging from 40%-80% of total arterial leg occlusion pressure (LOP) have been suggested to be sufficient to evoke muscular adaptation in healthy adults (14, 17, 18, 36). If the load is less than 30% 1RM, higher restrictive pressures seems required to evoke muscle hypertrophy, while lower pressures (40% LOP) requires training loads of 30% 1RM or above to be performed (36). Injury or joint pain (i.e. from the knee) might limit the amount of resistance applied during strength testing, and may thus compromise the ability to rely fully on a given 30% 1RM estimation. Therefore, higher pressures than 40% LOP are suggested to be used in clinical settings (36). On the other hand, higher pressures are associated with more discomfort during exercise and in between-set rest pauses (14),



1  
2  
3  
4 117 which potentially can affect exercise motivation negatively in patients. Thus, an occlusion pressure  
5  
6 118 sufficiently high to evoke measurable muscle adaptation despite potentially exercising at loads  
7  
8  
9 119 lower than 30% 1RM; yet tolerable to maintain a high adherence, seems a favorable choice for this  
10  
11 120 particular patient population.

12  
13 121 The adaptive mechanisms evoked by BFRE seem to involve accumulation of metabolites,  
14  
15  
16 122 ischemia (transient tissue hypoxia), which may increase recruitment of higher threshold (Type II)  
17  
18 123 fibers through stimulation of group III and IV afferent nerve fibers (37, 38), and also activation of  
19  
20 124 myogenic muscle stem cells (satellite cells: SC) (13, 26, 31). SC are cells positioned between the  
21  
22  
23 125 sarcolemma and the myofiber basal lamina (31, 39). SC play an important role in human skeletal  
24  
25 126 muscle growth due to their ability to donate new myonuclei to the muscle fibers (31, 40-44). That  
26  
27 127 is, the human skeletal muscle fibers are multinucleated cells with each myonucleus controlling the  
28  
29  
30 128 protein synthesis of a certain cytoplasmatic area in the muscle fiber (40-42, 45). Myonuclei  
31  
32 129 transcriptional activity can be fully maximized with exercise, hence requiring new myonuclei to  
33  
34 130 support further muscle tissue accretion (41, 42, 44). It has been suggested that exercise-related  
35  
36 131 addition of SC and myonuclei by means of BFRE might reduce the muscle atrophy related to  
37  
38  
39 132 bedrest and/or prolonged inactivity (31, 46). Previous studies applying short term (10 days)  
40  
41 133 preoperative BFRE before an anterior cruciate ligament rupture-reconstruction found no atrophy  
42  
43 134 protective effect or higher postoperative muscle strength compared to performing a low-load  
44  
45  
46 135 exercise without blood flow restriction (placebo). However, it might be questionable if the applied  
47  
48 136 training frequency, intensity and training period have been sufficient to promote SCs and myonuclei  
49  
50 137 addition. Thus, longer periods of intensive training might be necessary to promote the desired  
51  
52  
53 138 muscle morphological adaptations (addition of myonuclei and increased SC content).

54  
55 139

## 57 140 **Aim and hypothesis of the trial**

58  
59  
60

1  
2  
3  
4 141 The primary aim of this trial is to investigate the efficacy of eight weeks of BFRE compared to  
5  
6  
7 142 receiving usual care prior to TKR on postoperative chair stand performance. We hypothesize that  
8  
9 143 eight weeks of preoperative BFRE will lead to increased 30 second chair stand performance (30-  
10  
11 144 second Chair Stand Test: 30-s CST) when assessed three months postoperatively. Secondary aims  
12  
13  
14 145 are to investigate the efficacy of preoperative BFRE on lower limb muscle strength three months  
15  
16 146 after TKR and investigate the potential relationship to functional capacity and quality of life.  
17  
18 147 Furthermore, it will be investigated to which extent eight weeks of BFRE induce myofiber  
19  
20 148 hypertrophy and gain in satellite cell number and myonuclei content in the knee extensor  
21  
22  
23 149 musculature.  
24  
25 150  
26

## 27 151 **MATERIAL & METHODS**

### 29 152 **Design**

31  
32 153 The trial is designed as a multicenter (two sites), randomized, assessor blinded, controlled trial  
33  
34 154 following the CONSORT guidelines (47). Primary endpoint will be three months after TKR.  
35  
36 155 Additional and secondary endpoints will be evaluated during the week of TKR, six weeks after  
37  
38  
39 156 TKR (questionnaires only) and 12 months after TKR. Muscle biopsies will be obtained from all  
40  
41 157 patients undergoing surgery at Horsens Regional Hospital at baseline, during surgery and three  
42  
43 158 months after TKR.  
44  
45  
46 159  
47

### 48 160 **Participants**

49  
50 161 Patients will be recruited from the Departments of Orthopedic Surgery at Horsens and Silkeborg  
51  
52  
53 162 Regional Hospitals in Denmark. Patient enrollment will start September 2<sup>nd</sup> 2019 at Horsens  
54  
55 163 Regional Hospital and October 1<sup>st</sup> 2019 at Silkeborg Regional Hospital. Patient recruitment is  
56  
57 164 expected to be completed in June 2021. All patients are expected to have completed baseline testing  
58  
59  
60

1  
2  
3  
4  
5  
6  
7  
8  
9  
10  
11  
12  
13  
14  
15  
16  
17  
18  
19  
20  
21  
22  
23  
24  
25  
26  
27  
28  
29  
30  
31  
32  
33  
34  
35  
36  
37  
38  
39  
40  
41  
42  
43  
44  
45  
46  
47  
48  
49  
50  
51  
52  
53  
54  
55  
56  
57  
58  
59  
60

165 ultimo September 2021 and have performed three-month follow-up ultimo April 2022. Thus, at the  
166 end of September 2023 all patients are expected to have completed 12-month follow-up testing.

167  
168 Inclusion criteria: 1) Patients  $\geq 50$  years scheduled for TKR due to knee OA at Horsens- or  
169 Silkeborg Regional Hospital.

170  
171 Exclusion criteria: 1) Severe cardiovascular diseases (New York Heart Association (NYHA) class  
172 III and IV), previous stroke incident, thrombosis incident; 2) traumatic nerve injury in affected limb  
173 3) unregulated hypertension (systolic  $\geq 180$  or diastolic  $\geq 110$  mmHg) 4) spinal cord injury; 5)  
174 planned other lower limb surgery within 12 months; 6) cancer diagnosis and currently undergoing  
175 chemo-, immuno-, or radiotherapy; 7) inadequacy in written and spoken Danish; 8) an existing  
176 prosthesis in the index limb; 9) living more than 45 minutes from either Horsens Regional Hospital  
177 or Silkeborg Regional Hospital; 10) pregnancy.

178  
179 *Please insert figure 1 around here*

180  
181 All patients will be screened for eligibility by four orthopedic chief physicians at Horsens Regional  
182 Hospital and by three orthopedic chief physicians at Silkeborg Regional Hospital who will perform  
183 the initial inclusion of study participants and hand out written project information. All patients  
184 accepting to participate will be asked to complete a written informed consent allowing the  
185 physiotherapist (at Horsens Regional Hospital and Silkeborg Regional Hospital) to contact the  
186 patients by phone for a final eligibility and exclusion criteria-screening and book an appointment  
187 for baseline testing. If the patient agrees to participate in the trial, he/she will sign a written  
188 informed consent to participate in the project. Subsequently, the patient will be baseline-tested at

1  
2  
3  
4 189 the hospital by a blinded (to group allocation) assessor. Patients declining to participate in the RCT  
5  
6  
7 190 will be offered the option of participating in a parallel observational cohort trial. All patients  
8  
9 191 included in the project will be scheduled for a TKR. Two-three weeks before surgery all patients  
10  
11 192 will be invited to a, preoperative information meeting where nurses, surgeons, and physiotherapists  
12  
13 193 will provide detailed information on pain management, nutrition, the surgical procedure, physical  
14  
15  
16 194 activity, postoperative home-based rehabilitation (table 1a and 1b), load management, etc. (usual  
17  
18 195 care) (48). On the day of surgery, patients will be hospitalized at Horsens Regional Hospital or  
19  
20 196 Silkeborg Regional Hospital where an orthopedic chief physician will perform the TKR procedure.  
21  
22  
23 197 The day after surgery all patients will receive physiotherapy-supervised training once or twice per  
24  
25 198 day by a physiotherapist in order to fulfill the discharge criteria (table 2a and 2b) (48). Patients will  
26  
27 199 generally be discharged within ~one-two days after fulfilling all the discharge criteria listed above.  
28  
29  
30 200 After discharge, all patients will receive a standard home-based rehabilitation program focusing on  
31  
32 201 improving knee joint mobility, increasing the tolerance for standing without assistive devices, and  
33  
34 202 lower extremity muscle strength. Variations in the selection of exercises and exercise variables exist  
35  
36  
37 203 in the standard home-based rehabilitation programs between the respective hospitals; however, the  
38  
39 204 purpose of the programs is identical. If the patients do not fulfill the discharge criteria, they will be  
40  
41 205 offered supervised knee-specific exercise therapy at a municipal rehabilitation center or specialized  
42  
43 206 hospital-based rehabilitation after discharge from the hospital.  
44  
45  
46 207  
47

48 208 *Please insert table 1a and 1 b about here*  
49

50 209  
51  
52 210 *Please insert table 2a and figure 2b around here*  
53  
54

## 55 211 56 57 212 **Randomization** 58 59 60

1  
2  
3  
4 213 After baseline assessment, patients will be randomized (1:1) using the Research Electronic Data  
5  
6 214 Capture (REDCap) randomization system to either the training (BFRE) group or the control (CON)  
7  
8  
9 215 group. Prior to randomization, all patients will be booked for follow-up test sessions and surgery.  
10  
11 216 All randomization procedures will be performed by the physiotherapists in charge of the BFRE  
12  
13 217 training. Assessors performing the tests will be blinded to group allocation until completion of the  
14  
15  
16 218 trial. A flow chart of the patient allocation procedures is depicted in Figure 1.

17  
18 219  
19  
20 220 CON group: Participants in CON will receive usual care (see above) prior to TKR and be  
21  
22  
23 221 encouraged to continue their usual lifestyle up until TKR.

24  
25 222  
26  
27 223 BFRE group: In addition to receiving usual care (cf. above), participants in the BFRE group will  
28  
29 224 perform supervised BFRE sessions three times per week for eight weeks supervised by a  
30  
31 225 physiotherapist educated in administering BFRE. All BFRE training will be performed at Horsens  
32  
33 226 Regional Hospital and Silkeborg Regional Hospital.

34 227  
35  
36 228  
37  
38 228 **Intervention procedures**

39  
40  
41 229 BFRE

42  
43 230 Each BFRE session will consist of a 10-minute warm up (ergometer cycling) followed by two  
44  
45 231 different unilateral lower-limb resistance training exercises: 1) leg press and 2) knee extension  
46  
47  
48 232 performed on standard strength training machines. Each exercise will be performed with the  
49  
50 233 affected lower limb only and consist of four rounds interspaced by 30 seconds of rest (table 3). First  
51  
52 234 round: 30 repetitions (reps); second round: 15 reps; third round: 15 reps; fourth round: until  
53  
54 235 exhaustion (Table 1). If patients can perform more than 15 repetitions in the fourth exercise set, the  
55  
56 236 exercise load will be increased with the minimum extra load possible (30). Participants will be  
57  
58  
59 237 instructed to perform both the eccentric and concentric contraction phases using a steady 2-second  
60

1  
2  
3  
4 238 pace duration. The fourth and final exercise set will be performed to the point of exhaustion defined  
5  
6 239 as being unable to complete the final concentric contraction phase in 2 seconds. During the 30  
7  
8  
9 240 second rest period, patients will rest in a standardized resting position while maintaining the initial  
10  
11 241 cuff-pressure. Between each exercise, patients will have a 5-minute "free-flow" rest period. The 5  
12  
13 242 minutes rest period applied between exercises was chosen based on experiences from a previous  
14  
15  
16 243 pilot project (Jorgensen & Bohn 2019, unpublished data) and experience with applying BFRE in  
17  
18 244 clinical practice. In both situations, we often experienced that patients stayed seated in the leg press  
19  
20 245 machine for >2 minutes after the last (fatiguing) set to feel sufficiently rested and confident to walk  
21  
22  
23 246 from one exercise machine to another. The cuff will be released immediately after completion of the  
24  
25 247 final exercise set.

26  
27 248 The occlusion pressure during both exercises will be set at 60% of total limb occlusion pressure  
28  
29  
30 249 (LOP) and the starting load intensity will be 30% with 1 repetition maximum (1RM) in both  
31  
32 250 exercises.

33  
34 251 Individual LOP will be determined using a pneumatic, conically shaped, 12 cm wide, rigid cuff  
35  
36 252 (Occlude Aps, Denmark) attached to the patient's most proximal area of the thigh on the affected  
37  
38  
39 253 side. While sitting on an examination table with the ankle and 1/3 of the lower limb off the table, a  
40  
41 254 vascular Doppler probe (EDAN Instruments, inc., China) will be placed posterior to the medial  
42  
43 255 malleolus over the posterior tibial artery to capture the auscultatory pulse. To determine the cuff  
44  
45  
46 256 pressure (mmHg) needed for total blood flow occlusion, the cuff will gradually be inflated in 20  
47  
48 257 mmHg steps until reaching the pressure where the auscultatory pulse is interrupted (LOP). The first  
49  
50 258 time the auscultatory pulse is interrupted, the examiner releases 10-20 mmHg pressure from the cuff  
51  
52  
53 259 until the auscultatory pulse is present again. When the auscultatory pulse reappears, the cuff is  
54  
55 260 inflated with 10 mmHg until the LOP is found again. If the second LOP is identical to the first, it  
56  
57  
58  
59  
60

1  
2  
3  
4  
5  
6  
7  
8  
9  
10  
11  
12  
13  
14  
15  
16  
17  
18  
19  
20  
21  
22  
23  
24  
25  
26  
27  
28  
29  
30  
31  
32  
33  
34  
35  
36  
37  
38  
39  
40  
41  
42  
43  
44  
45  
46  
47  
48  
49  
50  
51  
52  
53  
54  
55  
56  
57  
58  
59  
60

261 will be defined as the LOP for that specific patient. Otherwise, the procedure will be repeated until  
262 determining an identical LOP two consecutive times.

*Please insert Table 3 about here*

### **Outcome variables**

267 Outcome assessments will be performed at baseline (before randomization), three-four days before  
268 surgery, six weeks after TKR, three months after TKR, and 12 months after TKR. To reduce the  
269 number of postoperative visits, only questionnaires; The Knee disability and Osteoarthritis Outcome  
270 Score (KOOS), EuroQol Group 5-dimensions (EQ-5D-L5) and reporting of adverse event or  
271 receiving supervised physiotherapy postoperatively will be sent via email six weeks after surgery.  
272 Two testers (two trained physiotherapists) blinded to group allocation will perform all baseline and  
273 follow-up measurements. Bergström needle muscle biopsies (49) will be taken from vastus lateralis  
274 of the quadriceps muscle in both lower limbs from patients included at Horsens Regional Hospital  
275 only at baseline, during surgery, and three months after TKR by doctors trained in performing the  
276 procedure. An overview of the data collection parameters is presented in Table 4.

277 Before starting the baseline testing, all assessors will be thoroughly trained in performing  
278 the tests according to the standardized test procedures for each test method. All assessors will be  
279 blinded to intervention allocation (pre surgery BFRE training or usual care). Further, assessors will  
280 be trained in how to communicate with the participants at follow-up test sessions to avoid break of  
281 blinding due to miscommunication. Also, all cases where blinding is being broken will be  
282 registered. Also, the physiotherapist in charge of LL-BFRE will be thoroughly trained in  
283 performing the exercise on healthy subjects before applying LL-BFRE on study-patients. At the last  
284 scheduled exercise session (i.e. 24th session), the physiotherapists in charge of LL-BFRE will

carefully remind the participants not to reveal their group allocation to any assessors at any time point during post testing.

The primary investigator will be in weekly contact with the physiotherapists supervising the LL-BFRE at Horsens Regional Hospitalet and Silkeborg Regional Hospital where day-to-day-retraining and supervision can be arranged. Furthermore, physiotherapists supervising the LL-BFRE will receive in-depth retraining every three months.

## Outcomes

*Please insert Table 4 about here*

### *Primary outcome*

**The 30s-CST** will be assessed using a 44 cm (seat height) chair with armrests. The 30s-CST measures the number of sit-to-stand repetitions completed within 30 seconds. The 30s-CST is considered a valid and sensitive measure of lower-extremity sit-to-stand function with good to excellent intra- and inter-observer reliability (50-52).

### *Secondary outcomes*

**The Timed Up & Go test (TUG)** assesses the time required for patients to stand from a 44 cm (seat height) chair walk around a tape mark 3 meters away and sit into the chair at return. The patients will be instructed to walk as fast and safely as possible towards the tape mark (and touch the tape mark (with at least one foot), turn around and return to the chair and sit down. Use of armrests is allowed. The fastest of two trials will be used for further analysis. Up to one minute of



1  
2  
3  
4  
5  
6  
7  
8  
9  
10  
11  
12  
13  
14  
15  
16  
17  
18  
19  
20  
21  
22  
23  
24  
25  
26  
27  
28  
29  
30  
31  
32  
33  
34  
35  
36  
37  
38  
39  
40  
41  
42  
43  
44  
45  
46  
47  
48  
49  
50  
51  
52  
53  
54  
55  
56  
57  
58  
59  
60

308 rest will be allowed between trials (53, 54). Good inter-rater reliability has been demonstrated with  
309 the TUG test (52).

310  
311 **4x10 meter walk test (40m-FWT)** measures the total time it takes to walk 4 x 10 meters excluding  
312 turns (meter/sec) (52). Patients will be instructed to walk as quickly and as safely as possible  
313 without running to a visible mark 10 meters away, return and repeat for a total distance of 40 meters  
314 (52). Prior to the test, one practice trial will be provided to check understanding. The 40m-FWT is a  
315 valid and responsive measure for assessing short distance maximum walking speed with excellent  
316 inter-rater reliability (52).

317  
318 **1RM leg press strength** will be estimated from a 5-8RM leg press test. Patients perform three low-  
319 load warm-up sets. The first and second warm-up sets consist of 12 repetitions, and the third warm-  
320 up set consists of eight repetitions. The load of each warm-up set will be increased with 10 kilos.  
321 After warm-up, the load will be increased to determine the 5RM. If the 5RM cannot be determined  
322 within three trials, a fourth all-out trial (as many repetitions as possible) will be performed. The  
323 1RM will be calculated as  $[1RM = \text{load (kg)} / 1.0278 - 0.0278 \cdot \text{number of repetitions}]$  (55).

324  
325 **1RM knee extension strength** will be estimated from 5-8RM knee extension test as described  
326 above for the estimation of 1RM leg press test (55).

327  
328 **Maximal isometric voluntary contraction (MVC) of the knee** will be measured using a handheld  
329 dynamometer (HHD). The patients will be seated on an examination table with knees and hips  
330 positioned at 90° flexion. The patients will be instructed to remain seated in an upright position and  
331 place both hands on the shoulder to avoid compensation. The HHD will be fixed with a rigid belt to  
332 the examination table. Adjustable straps will be used to allow MVCs of the knee extensors to be  
333 performed at 90° knee flexion in all patients. The HDD will be positioned 5 cm above the medial

1  
2  
3  
4  
5  
6  
7  
8  
9  
10  
11  
12  
13  
14  
15  
16  
17  
18  
19  
20  
21  
22  
23  
24  
25  
26  
27  
28  
29  
30  
31  
32  
33  
34  
35  
36  
37  
38  
39  
40  
41  
42  
43  
44  
45  
46  
47  
48  
49  
50  
51  
52  
53  
54  
55  
56  
57  
58  
59  
60

334 malleolus (56). The patients will be instructed to produce as much force as possible into the HHD.

335 Good to excellent inter- and intra-rater reliability has previously been demonstrated on group-level

336 in patients suffering from knee OA for maximum knee extensor muscle strength testing with HDD

337 (56, 57). Patients will receive four trials. For analysis, the mean maximal strength of the second,

338 third and fourth measures will be calculated and corrected for bodyweight (56)

339

340 **MVC of the knee flexors** will be measured and performed using HHD at 90° knee flexion with the

341 patients seated identically as during MVC for the knee extensors (56). The HHD will be positioned

342 posterior aspect of calcaneus (56) and patients will be instructed to produce as much force as

343 possible into the HHD. Good to excellent inter- and intra-rater reliability has previously been

344 demonstrated on group-level in patients suffering from knee OA for maximum knee flexor muscle

345 strength testing with HDD (56). Patients will receive four trials. For analysis, the mean maximal

346 strength of the second, third and fourth measures will be calculated and corrected for bodyweight

347 (56)

348

349 **Myofiber cross sectional area (CSA), muscle fiber type composition, satellite cell content, and**

350 **myonuclei number** will be assessed by obtaining needle biopsies (100-150 mg) from all patients

351 enrolled at Horsens Regional Hospital. The biopsies will be obtained bilaterally from the middle

352 portion of the vastus lateralis muscle utilizing the percutaneous needle biopsy technique of

353 Bergström (49, 58, 59). Biopsies will be performed by two experienced orthopedic surgeons (chief

354 physicians) trained in performing the needle muscle biopsy technique at Horsens Regional Hospital.

355 Efforts will be made to extract tissue from the same region (2-3 cm apart) and depth (~1-2 cm.)

356 (49). The tissue samples will be dissected of all visible blood, adipose tissue, and connective tissue

357 and mounted in Tissue-Tec (4583, Sakura Finetek, Alphen aan den Rijn, The Netherlands), frozen

1  
2  
3  
4 358 in isopenate pre-cooled with liquid nitrogen, and stored at -80°C (31, 49, 60). All muscle samples  
5  
6  
7 359 will be analyzed as previously described by Nielsen et al. (31) using immunofluorescence  
8  
9 360 microscopy. Transverse serial sections (8 µm) of the embedded muscle biopsy specimen will be cut  
10  
11 361 at -22°C using a cryostat (HM560; Microm, Walldorf, Germany) and will be mounted on glass  
12  
13  
14 362 slides for subsequent analysis as described in detail elsewhere (31). Myogenic stem cells (satellite  
15  
16 363 cells (SC)) will be visualized with an antibody against Pax7 (31). Type I (stained) and Type II  
17  
18 364 (unstained) myofibers will be differentiated, and muscle fiber area will be determined (31); MSC-  
19  
20  
21 365 derived nuclei will stain positive for Pax7 and be within the basal lamina; nuclei (DAPI stained)  
22  
23 366 with a sublaminar placement will be considered myonuclei (31).

24  
25 367  
26  
27 368 **Knee disability and Osteoarthritis Outcome Score (KOOS)** is a patient-administered knee  
28  
29  
30 369 specific questionnaire comprising five subscales: Pain; Symptoms; Activities of daily living; Sport  
31  
32 370 & Recreation; and Knee-Related Quality of Life. Each item is scored from 0 to 4 (61). The raw  
33  
34 371 score for each of the five subscales is the total sum of the associated item scores. Scores can be  
35  
36  
37 372 transformed to a 0 to 100 scale. The scores of the five subscales can be expressed as a composite  
38  
39 373 outcome profile, higher scores indicating fewer problems (62). The KOOS questionnaire is valid  
40  
41 374 and reliable in patients suffering from knee OA and patients on the waiting list for TKA for knee  
42  
43  
44 375 OA (61, 63, 64).

45  
46  
47  
48  
49  
50  
51  
52  
53  
54  
55  
56  
57  
58  
59  
60

1  
2  
3  
4 376  
5  
6  
7 377 **EuroQol Group 5-dimension (EQ-5D-5L)** is a self-completion questionnaire consisting of two  
8  
9 378 parts; the first part of the EQ-5D-5L comprises five dimensions involving mobility, self-care, usual  
10  
11 379 activities, pain/discomfort, and anxiety/depression. All dimensions have five response categories  
12  
13 380 (no problems, slight problems, moderate problems, severe problems, and extreme problems)  
14  
15  
16 381 resulting in a five digit descriptive health state (65), which will be converted into a summary index  
17  
18 382 ranging from -0.624 (worst) to 1.000 (best), using a Danish value set (66). The second part, EQ-  
19  
20 383 VAS rates the overall current health status from 0 (worst imaginable health) to 100 (best imaginable  
21  
22  
23 384 health) (65). The EQ-5D-5L is reliable and valid in patients with knee OA eligible for TKA (67,  
24  
25 385 68).

26  
27 386  
28 387 **Adverse events** will be defined as unpredicted or unintended events, signs, or disease occurring  
29  
30  
31 388 during the period from inclusion until the 3-month follow-up (primary end-point) resulting in  
32  
33 389 contact with the healthcare system (hospital or general practitioner) independent of whether or not  
34  
35 390 the event is related to the intervention or outcome assessments. Adverse events will be recorded and  
36  
37  
38 391 categorized in accordance with the definitions established by the United States Food and Drug  
39  
40 392 Administration [88]. Continuous registration of adverse events will be performed and a short open-  
41  
42 393 ended questionnaire will be administered at three months follow-up.  
43  
44  
45 394

#### 46 395 *Other Outcome Measures*

47  
48  
49 396 **Blood pressure** will be measured by the orthopedic chief physicians when patients are visiting the  
50  
51 397 outpatient clinic. Blood pressure will be used to determine eligibility to participate in the project.  
52  
53  
54 398

1  
2  
3  
4  
5  
6  
7  
8  
9  
10  
11  
12  
13  
14  
15  
16  
17  
18  
19  
20  
21  
22  
23  
24  
25  
26  
27  
28  
29  
30  
31  
32  
33  
34  
35  
36  
37  
38  
39  
40  
41  
42  
43  
44  
45  
46  
47  
48  
49  
50  
51  
52  
53  
54  
55  
56  
57  
58  
59  
60

**Exercise compliance and progression** will be obtained by the physiotherapist in charge of the training sessions and entered directly into the REDCap-system. The progression will be monitored as the total load lifted by the patient for exercise session.

**Numeric rating scale for pain** is a segmented unidimensional 11-item measure of pain intensity in adults (69) that will be used to rate pain intensity during both testing and exercise sessions. (69). 0 represents no pain while 10 represents worst pain imaginable (69).

**Declining to be operated** will be measured at three month follow-up, where patients will be asked whether they decided to be operated or not. Patients who declined to be operated will be invited to participate in all prescheduled follow-up assessments.

**Postoperative supervised physiotherapy** will be measured at six week, three month, and 12 month follow-up by answering a questionnaire. If patients have participated in postoperative supervised physiotherapy, the patient must specify whether the treatment was related to the TKR or due to other circumstances.

**Knee joint active range of motion** will be measured with a 360° plastic goniometer (scale 1°) with 16.5 cm moveable arms at baseline in the week of surgery, three months, and 12 months after surgery. Laying supine on an examination table, the knee joint flexion and knee joint extension will be measured separately (70). The tester then identifies the most prominent part of the trochanter, the lateral epicondyle of the femur, the lateral head of fibula, and the lateral malleolus. When identified, the patient is asked to flex the knee as much as possible with the heel maintaining contact to the surface at all time (70). Secondly, the patients will be asked to extend the knee joint as much as

1  
2  
3  
4 423 possible. To allow the knee to extend as much as possible, a firm quadratic box (height: 5 cm,  
5  
6  
7 424 width: 8 cm, length: 15 cm) will be placed under the heel of the patient. The procedure of  
8  
9 425 measuring knee extension will be similar to knee flexion, as the patients increases the degree of  
10  
11 426 knee extension maximally (70) The fulcrum of the goniometer will correspond visually to the trans-  
12  
13  
14 427 epicondylar axis of the knee joint. The moveable arms of the goniometer will be pointed towards  
15  
16 428 the greater trochanter and the lateral malleolus (70).  
17

### 18 429 19 20 430 **Data management**

21  
22  
23 431 All data from the physical function tests will be entered into RedCap by the assessors using double  
24  
25 432 data entry to ensure data quality. All patient-reported outcome data (KOOS, NRS Pain, EQ-5D-5L)  
26  
27 433 will be entered directly into RedCap by the patients, and usage of the “required fields” will ensure  
28  
29  
30 434 no missing items from the completed questionnaires. To reduce missing data, a reminder email will  
31  
32 435 be sent automatically from the RedCap-system. All patient data will be anonymized by assigning  
33  
34 436 study numbers to each patient (coding). Personal data about the patient will be located separately  
35  
36  
37 437 from the main dataset to protect confidentiality during all trial phases.

38  
39 438 The raw dataset will be maintained for ten years after completion of the trial with indefinite  
40  
41 439 restricted access due to sensitive data. After publication of the trial, a fully anonymized patient-level  
42  
43 440 dataset and corresponding statistical description will be made publicly available if required by the  
44  
45  
46 441 scientific journal, in which the results are published.  
47

### 48 442 49 50 443 51 52 444 **Sample size**

53  
54  
55 445 The power and sample size calculation is based on the expected differences between the two subject  
56  
57 446 groups from baseline to three-month follow-up (8). Due to lack of data on the primary outcome for  
58  
59  
60

1  
2  
3  
4 447 investigations applying LL-BFRE before a surgical procedure, we decided to base our sample size  
5  
6  
7 448 calculation on Skoffler et al. (8) who investigated the efficacy of four weeks of preoperative and  
8  
9 449 four weeks postoperative HRST (intervention group) compared to four weeks of postoperative  
10  
11 450 HRST only (control group) on 30-s CST three months in patients receiving a TKR (8). The authors  
12  
13  
14 451 found a between-group difference of 3-4 repetition difference ( $14.7 \pm 4.7$  repetitions versus  $11.0 \pm$   
15  
16 452  $4.4$  repetitions) three months after TKR surgery (8).

17  
18 453 To reduce the probability of type I errors and enable detection of a between-group difference  
19  
20  
21 454 also,  $\alpha$ -level is set at 0.05 ( $p < 0.05$ ) and  $\beta$ -level is set at 0.20 (80% power). Expecting a 3-repetition  
22  
23 455 between-group difference three months postoperatively and assuming a SD of 4.7 in both groups,  
24  
25 456 39 patients are required in each group (yielding 78 patients in total). With an anticipated dropout  
26  
27  
28 457 rate of 10%, 84 patients will be recruited for the trial.

29  
30 458

### 31 32 459 **Statistical considerations**

33  
34  
35 460 The primary efficacy analysis will be an assessment of the between group difference in change in  
36  
37 461 the 30-S CST from baseline to three-month follow-up (primary endpoint).

38  
39 462 All descriptive statistics and tests will be reported in accordance with the recommendations of  
40  
41  
42 463 the “Enhancing the QUALity and Transparency Of health Research” (EQUATOR) network (71) and  
43  
44 464 the CONSORT statement (47). Intention-to-treat principle (i.e. all patients as randomized  
45  
46 465 independent of departures from allocation treatment, compliance and/or withdrawals) and per  
47  
48 466 protocol analysis will be conducted. A one-way analysis of variance (one-way ANOVA) model will  
49  
50  
51 467 be used to analyze between group mean changes in continuous outcome measures (31). The model  
52  
53 468 includes changes from baseline to 12-month follow-up. Between-intervention comparison from  
54  
55 469 baseline to three months after surgery will be analyzed using a mixed linear model with patient ID  
56  
57  
58 470 as a random effect and time and group as fixed effects (31, 72). Also, to gain insight into the  
59  
60

1  
2  
3  
4 471 potential pre-to-post training differences within the respective training or control groups, paired  
5  
6 472 student t-tests will be performed. Level of statistical significance is  $P < 0.05$ . *Secondary outcome*  
7  
8  
9 473 *variables:* Between-intervention comparison from baseline to the week of surgery, six weeks after  
10  
11 474 surgery, three and 12 months after surgery will be analyzed as described for the primary outcome.  
12  
13 475 Regression analysis will be used to analyze the potential associations between preoperative strength  
14  
15  
16 476 and postoperative lower extremity function and self-reported outcome as well as between  
17  
18 477 preoperative functional capacity and postoperative functional capacity. Additionally, regression  
19  
20 478 analysis will be used to analyze the association between preoperative number of satellite cells and  
21  
22  
23 479 myonuclei on postoperative isometric knee extensor muscle strength, muscle fiber cross sectional  
24  
25 480 area, and functional capacity. All statistical analyses will be performed by the primary investigator  
26  
27 481 using Stata.

### 31 32 483 **Ethical aspects and dissemination**

33  
34 484 The trial has been accepted by the Central Denmark Region Committee on Biomedical Research  
35  
36 485 Ethics (Journal No 10-72-19-19) and by the Danish Data Protection Agency (Journal No 652164).  
37  
38  
39 486 The trial is registered at Clinicaltrials.gov (NCT04081493). Before inclusion, all patients will  
40  
41 487 provide their written informed consent in accordance with the Helsinki Declaration. All data and  
42  
43 488 information collected in regard to this trial will be treated confidentially (blinded and encrypted) by  
44  
45  
46 489 the researchers and staff connected to the trial.

47  
48 490 All results from the trial will be published in international peer-reviewed scientific journals  
49  
50 491 regardless of the results being considered positive, negative or inconclusive.

### 52 53 492 54 55 493 **Patient and public involvement**

56  
57 494 Before developing this clinical trial, a pilot project was performed to determine the feasibility and  
58  
59  
60



1  
2  
3  
4  
5  
6  
7  
8  
9  
10  
11  
12  
13  
14  
15  
16  
17  
18  
19  
20  
21  
22  
23  
24  
25  
26  
27  
28  
29  
30  
31  
32  
33  
34  
35  
36  
37  
38  
39  
40  
41  
42  
43  
44  
45  
46  
47  
48  
49  
50  
51  
52  
53  
54  
55  
56  
57  
58  
59  
60

495 efficacy of BFRE in patients suffering from lower limb injuries. The experiences with the training  
496 modality and the verbal feedback from patients on training duration, frequency, and intensity  
497 resulted in useful knowledge that certainly has improved the development of the present clinical  
498 trial.

## 500 **DISCUSSION**

501 To the best of our knowledge, this is the first trial to investigate the effect of preoperative BFRE on  
502 functional capacity, self-reported outcome, lower limb muscle strength and myofiber  
503 morphology/stem cell abundance in patients scheduled for TKR. Only few studies have investigated  
504 (short term (10 days)) preoperative BFRE without finding an atrophy protective effect or difference  
505 in muscle strength compared to a control group performing a placebo intervention (SHAM group)  
506 (73). However, patients performing short term preoperative BFRE before ACL-R demonstrated  
507 higher muscle endurance compared to a SHAM group (74). Therefore, results of this trial are  
508 expected to provide novel information on longer periods of BFRE that will enable researchers to  
509 design effective exercise-based preconditioning protocols for elective TKR patients. The LL-BFRE  
510 protocol applied in the present project is widely used and follows the recommendations from a  
511 recent position stand by Patterson et al. (75). The authors suggested that exercising 2-3 times per  
512 week at 20-40% of 1RM in 2-4 sets (e.g. 30-15-15-15 or sets to failure) using pressures between 40  
513 to 80% of LOP has demonstrated to be effective when aiming at increasing muscle strength and  
514 promoting muscle hypertrophy (75).

515 The trial is designed as an assessor blinded randomized controlled trial, thus representing the  
516 highest evidence level. However, the nature of the trial does not allow blinding of the participants  
517 which is an inherent limitation of the trial. The trial is conducted at two hospitals that consistently  
518 perform a high number of TKR procedures annually (225 and 460, respectively), thus securing a

1  
2  
3  
4  
5  
6  
7  
8  
9  
10  
11  
12  
13  
14  
15  
16  
17  
18  
19  
20  
21  
22  
23  
24  
25  
26  
27  
28  
29  
30  
31  
32  
33  
34  
35  
36  
37  
38  
39  
40  
41  
42  
43  
44  
45  
46  
47  
48  
49  
50  
51  
52  
53  
54  
55  
56  
57  
58  
59  
60

519 strong expertise in terms of surgery and infrastructure. Both hospitals have all equipment needed  
520 available for surgery, post-operative hospitalization, training, and testing. All outcome variables are  
521 considered valid and reliable measures and consist of both objective outcomes and self-reported  
522 patient outcomes.

523 No adverse health-related events have been reported in previous studies applying BFRE in  
524 patients' suffering from knee OA or in healthy older adults (1, 9, 13, 23, 33, 34). Further, in a recent  
525 review and meta-analysis it was stated that exercise with concurrent blood-flow restriction is a safe  
526 exercise modality when occlusion procedures are applied correctly (13). The inherent invasive  
527 procedure of muscle biopsies may cause adverse events in rare occasions. Therefore, all muscle  
528 biopsy samples will be collected by trained medical doctors and performed following administration  
529 of local anesthesia and in fully sterile conditions. The needle muscle biopsy protocol has been  
530 applied in a large number of previous investigations including very old frail subjects (97 years of  
531 age) without any reporting of adverse events besides occasional muscle soreness(31, 49, 58, 76, 77).

532 There are some limitations of the project that must be taken into account. First, our primary end  
533 point is three months postoperatively. The (uncontrolled) period discharge to three months  
534 postoperatively renders the project vulnerable to external variabilities. However, from a pragmatic  
535 point of view, this uncontrolled period from discharge to three-month follow-up reflects the reality  
536 that Danish patients face postoperatively. Thus, the results at three-month follow-up will, indeed,  
537 reflect the impact of performing preoperative LL-BFRE on the postoperative outcome regardless of  
538 the external variable that can hamper the results. Secondly, the discharge criteria at Horsens  
539 Regional Hospital and Silkeborg Regional Hospital withhold slight differences. That is, the  
540 acceptable knee joint ROM at discharge differs between the sites, thus it can be speculated that  
541 more patients from Silkeborg Regional Hospital will be offered a postoperative, supervised  
542 rehabilitation program. This might affect the number of patients receiving supervised physiotherapy

1  
2  
3  
4  
5  
6  
7  
8  
9  
10  
11  
12  
13  
14  
15  
16  
17  
18  
19  
20  
21  
22  
23  
24  
25  
26  
27  
28  
29  
30  
31  
32  
33  
34  
35  
36  
37  
38  
39  
40  
41  
42  
43  
44  
45  
46  
47  
48  
49  
50  
51  
52  
53  
54  
55  
56  
57  
58  
59  
60

543 after discharge between sites. However, all patients included in the present project will report  
544 whether they have received postoperative supervised physiotherapy at all follow-up assessments.  
545 Thus, we will be able to determine (and normalize) a potential between-site difference in patients  
546 receiving supervised physiotherapy after TKR.

547

#### 548 **Author contributions**

549 SLJ, PAA, MBB, and IM were all part of designing the trial and approved the final version of the  
550 protocol. Also, SLJ, PAA, MBB, and IM wrote and revised the protocol.

551

#### 552 **Data statement**

553 All obtained data will be stored in anonymized form at the Danish National Archives and deleted  
554 after 10 years.

555

#### 556 **Funding**

557 This work trial is supported by Aase og Ejnar Danielsen's Foundation (100,000 dkk), Nis-Hanssen's  
558 Mindeslegat (163,883 dkk) and the Health Research Foundation of Central Denmark Region  
559 (99,658 dkk), Hede-Nielsen Foundation (8,000 dkk).

560

#### 561 **Competing interest**

562 None to be declared

563

#### 564 **Ethics approval**

565 The trial has been accepted by the Central Denmark Region Committee on Biomedical Research

1  
2  
3  
4  
5  
6  
7  
8  
9  
10  
11  
12  
13  
14  
15  
16  
17  
18  
19  
20  
21  
22  
23  
24  
25  
26  
27  
28  
29  
30  
31  
32  
33  
34  
35  
36  
37  
38  
39  
40  
41  
42  
43  
44  
45  
46  
47  
48  
49  
50  
51  
52  
53  
54  
55  
56  
57  
58  
59  
60

566 Ethics (Journal No 10-72-19-19) and by the Danish Data Protection Agency (Reference No  
567 652164).

568  
569 **Word count**

570 5.770 words

571

For peer review only

1  
2  
3  
4  
5  
6  
7  
8  
9  
10  
11  
12  
13  
14  
15  
16  
17  
18  
19  
20  
21  
22  
23  
24  
25  
26  
27  
28  
29  
30  
31  
32  
33  
34  
35  
36  
37  
38  
39  
40  
41  
42  
43  
44  
45  
46  
47  
48  
49  
50  
51  
52  
53  
54  
55  
56  
57  
58  
59  
60**REFERENCES**

1. Ferraz RB, Gualano B, Rodrigues R, Kurimori CO, Fuller R, Lima FR, et al. Benefits of Resistance Training with Blood Flow Restriction in Knee Osteoarthritis. *Medicine and science in sports and exercise*. 2018.
2. Bade MJ, Kohrt WM, Stevens-Lapsley J. Outcomes before and after total knee arthroplasty compared to healthy adults. *The Journal of orthopaedic and sports physical therapy*. 2010.
3. Fransen M, McConnell S, Harmer AR, Van dE, Simic M, Bennell KL. Exercise for osteoarthritis of the knee. 2015.
4. Skoffler B, Dalgas U, Mechlenburg I. Progressive resistance training before and after total hip and knee arthroplasty: A systematic review. 2015.
5. Sundhedsstyrelsen. Knæartrose - nationale kliniske retningslinjer og faglige visitationsretningslinjer2012.
6. Franz A, Queitsch FP, Behringer M, Mayer C, Krauspe R, Zilkens C. Blood flow restriction training as a prehabilitation concept in total knee arthroplasty: A narrative review about current preoperative interventions and the potential impact of BFR. *Medical hypotheses*. 2018.
7. Calatayud J, Casaña J, Ezzatvar Y, Jakobsen MD, Sundstrup E, Andersen LL. High-intensity preoperative training improves physical and functional recovery in the early post-operative periods after total knee arthroplasty: a randomized controlled trial. *Knee surgery, sports traumatology, arthroscopy : official journal of the ESSKA*. 2016.
8. Skoffler B, Maribo T, Mechlenburg I, Hansen PM, Søballe K, Dalgas U. Efficacy of Preoperative Progressive Resistance Training on Postoperative Outcomes in Patients Undergoing Total Knee Arthroplasty. *Arthritis Care & Research*. 2016.
9. Bryk FF, dos Reis AC, Fingerhut D, Araujo T, Schutzer M, Cury RdPL, et al. Exercises with partial vascular occlusion in patients with knee osteoarthritis: a randomized clinical trial. *Knee Surgery, Sports Traumatology, Arthroscopy*. 2016;24(5):1580-6.
10. Wang L, Lee M, Zhang Z, Moodie J, Cheng D, Martin J. Does preoperative rehabilitation for patients planning to undergo joint replacement surgery improve outcomes? A systematic review and meta-analysis of randomised controlled trials. *BMJ open*. 2016;6(2):e009857-2015-.
11. Chesham RA, Shanmugam S. Does preoperative physiotherapy improve postoperative, patient-based outcomes in older adults who have undergone total knee arthroplasty? A systematic review. 2017.
12. Kwok IH, Paton B, Haddad FS. Does Pre-Operative Physiotherapy Improve Outcomes in Primary Total Knee Arthroplasty? - A Systematic Review. *The Journal of arthroplasty*. 2015;30(9):1657-63.
13. Hughes L, Paton B, Rosenblatt B, Gissane C, Patterson SD. Blood flow restriction training in clinical musculoskeletal rehabilitation: A systematic review and meta-analysis. 2017.
14. Counts BRDSJBBEKDG MJAKMTRSATBMGLJP. Influence of Relative Blood Flow Restriction Pressure on Muscle Activation and Muscle Adaptation. *Muscle & nerve*. 2016;53:438-45.
15. Kim D, Loenneke JP, Ye X, Bembem DA, Beck TW, Larson RD, et al. Low-load resistance training with low relative pressure produces muscular changes similar to high-load resistance training. *Muscle & nerve*. 2017;56(6):E126-E33.
16. Loenneke JP, Fahs CA, Rossow LM, Sherk VD, Thiebaud RS, Abe T, et al. Effects of cuff width on arterial occlusion: implications for blood flow restricted exercise. *European journal of applied physiology*. 2012;112(8):2903-12.
17. Loenneke JP, Kim D, Fahs CA, Thiebaud RS, Abe T, Larson RD, et al. The influence of exercise load with and without different levels of blood flow restriction on acute changes in muscle thickness and lactate. *Clinical Physiology and Functional Imaging*. 2017.

- 1  
2  
3  
4 625 18. Loenneke JP, Kim D, Fahs CA, Thiebaud RS, Abe T, Larson RD, et al. Effects of  
5 626 exercise with and without different degrees of blood flow restriction on torque and muscle  
6 627 activation. *Muscle & nerve*. 2015.  
7 628 19. Loenneke JP, Thrower AD, Balapur A, Barnes JT, Pujol TJ. Blood flow-restricted  
8 629 walking does not result in an accumulation of metabolites. *Clinical physiology and functional*  
9 630 *imaging*. 2012;32(1):80-2.  
10 631 20. Loenneke JP, Wilson JM, Balapur A, Thrower AD, Barnes JT, Pujol TJ. Time under  
11 632 tension decreased with blood flow-restricted exercise. *Clinical physiology and functional*  
12 633 *imaging*. 2012;32(4):268-73.  
13 634 21. Loenneke JP, Wilson JM, Wilson GJ, Pujol TJ, Bembem MG. Potential safety issues  
14 635 with blood flow restriction training. 2011. p. 510-8.  
15 636 22. Loenneke JP, Young KC, Fahs CA, Rossow LM, Bembem DA, Bembem MG. Blood  
16 637 flow restriction: rationale for improving bone. *Medical hypotheses*. 2012;78(4):523-7.  
17 638 23. Ozaki H, Loenneke JP, Abe T. Blood flow-restricted walking in older women: does  
18 639 the acute hormonal response associate with muscle hypertrophy? *Clinical physiology and*  
19 640 *functional imaging*. 2017;37(4):379-83.  
20 641 24. Ozaki H, Loenneke JP, Thiebaud RS, Stager JM, Abe T. Possibility of leg muscle  
21 642 hypertrophy by ambulation in older adults: a brief review. *Clinical interventions in aging*.  
22 643 2013;8:369-75.  
23 644 25. Scott BR, Loenneke JP, Slattery KM, Dascombe BJ. Blood flow restricted exercise  
24 645 for athletes: A review of available evidence. *Journal of science and medicine in sport*.  
25 646 2016;19(5):360-7.  
26 647 26. Scott BR, Loenneke JP, Slattery KM, Dascombe BJ. Exercise with blood flow  
27 648 restriction: an updated evidence-based approach for enhanced muscular development. *Sports*  
28 649 *medicine (Auckland, NZ)*. 2015;45(3):313-25.  
29 650 27. Takarada Y, Nakamura Y, Aruga S, Onda T, Miyazaki S, Ishii N. Rapid increase in  
30 651 plasma growth hormone after low-intensity resistance exercise with vascular occlusion. *Journal*  
31 652 *of applied physiology (Bethesda, Md: 1985)*. 2000;88(1):61-5.  
32 653 28. Takarada Y, Sato Y, Ishii N. Effects of resistance exercise combined with vascular  
33 654 occlusion on muscle function in athletes. *European journal of applied physiology*. 2002;86:308-  
34 655 14.  
35 656 29. Takarada Y, Takazawa H, Ishii N. Applications of vascular occlusion diminish  
36 657 disuse atrophy of knee extensor muscles. *Medicine and science in sports and exercise*.  
37 658 2000;32(12):2035-9.  
38 659 30. Jørgensen AN, Aagaard P, Nielsen JL, Frandsen U, Diederichsen LP. Effects of  
39 660 blood-flow-restricted resistance training on muscle function in a 74-year-old male with  
40 661 sporadic inclusion body myositis: a case report. *Clinical Physiology and Functional Imaging*.  
41 662 2016;36(6):504-9.  
42 663 31. Nielsen JL, Aagaard P, Bech RD, Nygaard T, Hvid LG, Wernbom M, et al.  
43 664 Proliferation of myogenic stem cells in human skeletal muscle in response to low-load  
44 665 resistance training with blood flow restriction. *The Journal of physiology*. 2012;590(17):4351-  
45 666 61.  
46 667 32. Nielsen JL, Aagaard P, Prokhorova TA, Nygaard T, Bech RD, Suetta C, et al.  
47 668 Blood-flow restricted training leads to myocellular macrophage infiltration and upregulation of  
48 669 heat-shock proteins, but no apparent muscle damage. *The Journal of physiology*.  
49 670 2017;14:4857-73.  
50 671 33. Segal N, Davis MD, Mikesky AE. Efficacy of Blood Flow-Restricted Low-Load  
51 672 Resistance Training For Quadriceps Strengthening in Men at Risk of Symptomatic Knee  
52 673 Osteoarthritis. *Geriatric orthopaedic surgery & rehabilitation*. 2015;6(3):160-7.  
53 674 34. Segal NA, Williams GN, Davis MC, Wallace RB, Mikesky AE. Efficacy of blood flow-  
54 675 restricted, low-load resistance training in women with risk factors for symptomatic knee  
55 676 osteoarthritis. *PM & R : the journal of injury, function, and rehabilitation*. 2015;7(4):376-84.  
56 677 35. Jessee MB, Mattocks KT, Buckner SL, Dankel SJ, Mouser JG, Abe T, et al.  
57 678 Mechanisms of Blood Flow Restriction: The New Testament. *Techniques in Orthopaedics*.  
58 679 2018;33(2):72-9.  
60

- 1  
2  
3  
4 680 36. Mattocks KT, Jessee MB, Mouser JG, Dankel SJ, Buckner SL, Bell ZW, et al. The  
5 681 Application of Blood Flow Restriction: Lessons From the Laboratory. *Current sports medicine*  
6 682 *reports*. 2018;17(4):129-34.
- 7 683 37. Wernbom M, Augustsson J, Raastad T. Ischemic strength training: a low-load  
8 684 alternative to heavy resistance exercise? *Scandinavian Journal of Medicine & Science in Sports*.  
9 685 2008;18(4):401-16.
- 10 686 38. Wernbom M, Aagaard P. Muscle fibre activation and fatigue with low-load blood  
11 687 flow restricted resistance exercise-An integrative physiology review. *Acta physiologica (Oxford,*  
12 688 *England)*. 2019:e13302.
- 13 689 39. Mauro A. Satellite cell of skeletal muscle fibers. *The Journal of biophysical and*  
14 690 *biochemical cytology*. 1961.
- 15 691 40. Kadi F, Charifi N, Denis C, Lexell J. Satellite cells and myonuclei in young and  
16 692 elderly women and men. *Muscle and Nerve*. 2004.
- 17 693 41. Olsen S, Aagaard P, Kadi F, Tufekovic G, Verney J, Olesen JL, et al. Creatine  
18 694 supplementation augments the increase in satellite cell and myonuclei number in human  
19 695 skeletal muscle induced by strength training. *Journal of Physiology*. 2006.
- 20 696 42. Francaux M, Deldicque L. Exercise and the control of muscle mass in human.  
21 697 *Pflügers Archiv - European Journal of Physiology*. 2018.
- 22 698 43. Kadi F, Schjerling P, Andersen LL, Charifi N, Madsen J, Christensen LR, et al. The  
23 699 effects of heavy resistance training and detraining on satellite cells in human skeletal muscles.  
24 700 *The Journal of physiology*. 2004.
- 25 701 44. Bazgir B, Fathi R, Valojerdi MR, Mozdziak P, Asgari A. Satellite cells contribution to  
26 702 exercise mediated muscle hypertrophy and repair. 2016.
- 27 703 45. Covinsky KE, Lindquist K, Dunlop DD, Gill TM, Yelin E. Effect of arthritis in middle  
28 704 age on older-age functioning. *Journal of the American Geriatrics Society*. 2008;56(1):23-8.
- 29 705 46. Bruusgaard JC, Johansen IB, Egner IM, Rana ZA, Gundersen K. Myonuclei  
30 706 acquired by overload exercise precede hypertrophy and are not lost on detraining. *Proceedings*  
31 707 *of the National Academy of Sciences*. 2010.
- 32 708 47. Moher D, Hopewell S, Schulz KF, Montori V, Gotzsche PC, Devereaux PJ, et al.  
33 709 CONSORT 2010 explanation and elaboration: updated guidelines for reporting parallel group  
34 710 randomised trials. *International journal of surgery (London, England)*. 2012;10(1):28-55.
- 35 711 48. M B. Knæalloplastik - fysioterapeutisk instruks [https://e-](https://e-dok.rm.dk/edok/admin/GUI.nsf/Desktop.html?Open&login)  
36 712 [dok.rm.dk/edok/admin/GUI.nsf/Desktop.html?Open&login](https://e-dok.rm.dk/edok/admin/GUI.nsf/Desktop.html?Open&login): e-dok; 2019 [updated 03.04.19.  
37 713 4:[1].
- 38 714 49. Suetta C, Andersen JL, Dalgas U, Berget J, Koskinen S, Aagaard P, et al.  
39 715 Resistance training induces qualitative changes in muscle morphology, muscle architecture,  
40 716 and muscle function in elderly postoperative patients. *Journal of applied physiology (Bethesda,*  
41 717 *Md: 1985)*. 2008;105(1):180-6.
- 42 718 50. Gill S, McBurney H. Reliability of performance-based measures in people awaiting  
43 719 joint replacement surgery of the hip or knee. *Physiotherapy Research International : The*  
44 720 *Journal for Researchers and Clinicians in Physical Therapy*. 2008;13(3):141-52.
- 45 721 51. Jones CJ, Rikli RE, Beam WC. A 30-s chair-stand test as a measure of lower body  
46 722 strength in community-residing older adults. *Research quarterly for exercise and sport*.  
47 723 1999;70(2):113-9.
- 48 724 52. Wright AA, Cook CE, Baxter GD, Dockerty JD, Abbott JH. A comparison of 3  
49 725 methodological approaches to defining major clinically important improvement of 4  
50 726 performance measures in patients with hip osteoarthritis. *The Journal of orthopaedic and*  
51 727 *sports physical therapy*. 2011;41(5):319-27.
- 52 728 53. Bloch ML, Jonsson LR, Kristensen MT. Introducing a Third Timed Up & Go Test  
53 729 Trial Improves Performances of Hospitalized and Community-Dwelling Older Individuals.  
54 730 *Journal of geriatric physical therapy (2001)*. 2017;40(3):121-6.
- 55 731 54. Kristensen MT, Ekdahl C, Kehlet H, Bandholm T. How many trials are needed to  
56 732 achieve performance stability of the Timed Up & Go test in patients with hip fracture? *Archives*  
57 733 *of Physical Medicine and Rehabilitation*. 2010;91(6):885-9.
- 58  
59  
60

- 1  
2  
3  
4 734 55. Hansen H. RM-testmanal. Danish Physiotherapy Society: Danish Physiotherapy  
5 735 Society; 2012. p. 2.  
6 736 56. Koblbauer IFH, Lambrecht Y, Van DH, Neeter C, Engelbert RHH, Poolman RW, et  
7 737 al. Reliability of maximal isometric knee strength testing with modified hand-held  
8 738 dynamometry in patients awaiting total knee arthroplasty: Useful in research and individual  
9 739 patient settings? A reliability study. BMC Musculoskeletal Disorders. 2011.  
10 740 57. C N, V.A.B S, Y L, I K, M VDH, R.H.H E, et al. Reliability of hand-held  
11 741 dynamometry in patients awaiting total knee arthroplasty. Physiotherapy (United Kingdom).  
12 742 2011.  
13 743 58. Ekblom B. The muscle biopsy technique. Historical and methodological  
14 744 considerations. Scandinavian Journal of Medicine & Science in Sports. 2017;27(5):458-61.  
15 745 59. Bergstrom J. Muscle electrolytes in man determined by neutron activation analysis  
16 746 on needle biopsy specimens. Scandinavian Journal of Clinical and Laboratory Investigation  
17 747 (England). 1962;14(Suppl 68).  
18 748 60. Aagaard P, Andersen JL, Dyhre-Poulsen P, Leffers AM, Wagner A, Peter  
19 749 Magnusson S, et al. A mechanism for increased contractile strength of human pennate muscle  
20 750 in response to strength training: Changes in muscle architecture. Journal of Physiology.  
21 751 2001;534(2):613-23.  
22 752 61. Roos EM, Lohmander LS. The Knee injury and Osteoarthritis Outcome Score  
23 753 (KOOS): From joint injury to osteoarthritis. 2003.  
24 754 62. Nilsson AK, Lohmander LS, Klassbo M, Roos EM. Hip disability and osteoarthritis  
25 755 outcome score (HOOS)--validity and responsiveness in total hip replacement. BMC  
26 756 musculoskeletal disorders. 2003;4:10-2474-4-10. Epub 003 May 30.  
27 757 63. Lyman S, Lee YY, McLawhorn AS, Islam W, MacLean CH. What Are the Minimal  
28 758 and Substantial Improvements in the HOOS and KOOS and JR Versions After Total Joint  
29 759 Replacement? Clinical orthopaedics and related research. 2018;476(12):2432-41.  
30 760 64. Collins NJ, Prinsen CA, Christensen R, Bartels EM, Terwee CB, Roos EM. Knee  
31 761 Injury and Osteoarthritis Outcome Score (KOOS): systematic review and meta-analysis of  
32 762 measurement properties. Osteoarthritis and cartilage. 2016;24(8):1317-29.  
33 763 65. Herdman M, Gudex C, Lloyd A, Janssen M, Kind P, Parkin D, et al. Development  
34 764 and preliminary testing of the new five-level version of EQ-5D (EQ-5D-5L). Quality of life  
35 765 research : an international journal of quality of life aspects of treatment, care and  
36 766 rehabilitation. 2011;20(10):1727-36.  
37 767 66. Wittrup-Jensen KU, Lauridsen J, Gudex C, Pedersen KM. Generation of a Danish  
38 768 TTO value set for EQ-5D health states. Scandinavian Journal of Public Health. 2009;37(5):459-  
39 769 66.  
40 770 67. Bilbao A, Garcia-Perez L, Arenaza JC, Garcia I, Ariza-Cardiel G, Trujillo-Martin E,  
41 771 et al. Psychometric properties of the EQ-5D-5L in patients with hip or knee osteoarthritis:  
42 772 reliability, validity and responsiveness. Quality of life research : an international journal of  
43 773 quality of life aspects of treatment, care and rehabilitation. 2018;27(11):2897-908.  
44 774 68. Buchholz I, Janssen MF, Kohlmann T, Feng YS. A Systematic Review of Studies  
45 775 Comparing the Measurement Properties of the Three-Level and Five-Level Versions of the EQ-  
46 776 5D. PharmacoEconomics. 2018;36(6):645-61.  
47 777 69. Hawker GA, Mian S, Kendzerska T, French M. Measures of adult pain: Visual  
48 778 Analog Scale for Pain (VAS Pain), Numeric Rating Scale for Pain (NRS Pain), McGill Pain  
49 779 Questionnaire (MPQ), Short-Form McGill Pain Questionnaire (SF-MPQ), Chronic Pain Grade  
50 780 Scale (CPGS), Short Form-36 Bodily Pain Scale (SF-36 BPS), and Measure of Intermittent and  
51 781 Constant Osteoarthritis Pain (ICOAP). Arthritis care & research. 2011;63 Suppl 11:S240-52.  
52 782 70. Jakobsen TL, Christensen M, Christensen SS, Olsen M, Bandholm T. Reliability of  
53 783 knee joint range of motion and circumference measurements after total knee arthroplasty:  
54 784 does tester experience matter? Physiotherapy Research International. 2010;15(3):126-34.  
55 785 71. Christensen R, Bliddal H, Henriksen M. Enhancing the reporting and transparency  
56 786 of rheumatology research: a guide to reporting guidelines. Arthritis research & therapy.  
57 787 2013;15(1):109.  
58  
59  
60



1  
2  
3  
4  
5  
6  
7  
8  
9  
10  
11  
12  
13  
14  
15  
16  
17  
18  
19  
20  
21  
22  
23  
24  
25  
26  
27  
28  
29  
30  
31  
32  
33  
34  
35  
36  
37  
38  
39  
40  
41  
42  
43  
44  
45  
46  
47  
48  
49  
50  
51  
52  
53  
54  
55  
56  
57  
58  
59  
60

- 788 72. Malcata RM, Hopkins WG, Pearson SN. Tracking career performance of successful  
789 triathletes. *Medicine and science in sports and exercise*. 2014;46(6):1227-34.
- 790 73. Grapar Zargi T, Drobnic M, Jkoder J, Strazar K, Kacin A. The effects of  
791 preconditioning with ischemic exercise on quadriceps femoris muscle atrophy following anterior  
792 cruciate ligament reconstruction: a quasi-randomized controlled trial. *European journal of*  
793 *physical and rehabilitation medicine*. 2016;52(3):310-20.
- 794 74. Zargi T, Drobnic M, Strazar K, Kacin A. Short-Term Preconditioning With Blood  
795 Flow Restricted Exercise Preserves Quadriceps Muscle Endurance in Patients After Anterior  
796 Cruciate Ligament Reconstruction. *Frontiers in physiology*. 2018;9:1150.
- 797 75. Patterson SD, Hughes L, Warmington S, Burr J, Scott BR, Owens J, et al. Blood  
798 Flow Restriction Exercise Position Stand: Considerations of Methodology, Application, and  
799 Safety. *Frontiers in physiology*. 2019;10:533.
- 800 76. Andersen J, Aagaard P. Myosin heavy chain IIX overshoot in human skeletal  
801 muscle. *Muscle & nerve*. 2000;23:1095-104.
- 802 77. Malm C, Nyberg P, Engstrom M, Sjodin B, Lenkei R, Ekblom B, et al.  
803 Immunological changes in human skeletal muscle and blood after eccentric exercise and  
804 multiple biopsies. *The Journal of physiology*. 2000;529 Pt 1:243-62.

peer review only

807 *Table 1a.* Postoperative rehabilitation program, Horsens Regional Hospital

| Week 0-3           |                                                                                               |                          |                 |                                                                                                   |
|--------------------|-----------------------------------------------------------------------------------------------|--------------------------|-----------------|---------------------------------------------------------------------------------------------------|
| Step               | Exercise                                                                                      | Repetitions              | Sets            | Resistance                                                                                        |
| Step 1 & 2         | Supine peristaltic pump exercise with feet above heart level                                  | 20 minutes               | 3-4/day         | -                                                                                                 |
| Step 1             | Supine knee extension mobilization                                                            | 20 seconds               | 3 sets          | -                                                                                                 |
| Step 1             | Supine unilateral knee and hip extension and flexion mobilization with slipper under the heel | 5 repetitions            | 3 sets          | Slipper minimizes floor friction                                                                  |
| Step 2             | Seated knee extension and flexion mobilization with slipper under the foot                    | 5 repetitions            | 3 sets          | Slipper minimizes floor friction                                                                  |
| Step 2             | Standing weight transfer exercise                                                             | 15 repetitions each side | 1 set           | Bodyweight                                                                                        |
| Step 2             | Sit to stand from a high chair or the edge of table                                           | 5 repetitions            | 3 sets          | Bodyweight                                                                                        |
| Week 3 and onwards |                                                                                               |                          |                 |                                                                                                   |
| Step 1 & 2         | Supine peristaltic pump exercise with feet above heart level                                  | 20 minutes               | 3-4/day         | -                                                                                                 |
| Step 1             | Seated knee extension mobilization                                                            | 20 seconds               | 4 rounds        | Arms can be used to apply pressure onto the knee to help extend the knee                          |
| Step 1             | Step up exercise                                                                              | 10-15 repetitions        | 2-3 sets        | Bodyweight                                                                                        |
| Step 1             | Standing knee isometric knee towel press                                                      | 10-15 repetitions        | 2-3 sets        | Ball/Towel rolled together                                                                        |
| Step 1             | Sit to stand from a chair                                                                     | 10-15 repetitions        | 2-3 sets        | Bodyweight                                                                                        |
| Step 1             | One leg standing                                                                              | 30 seconds               | 1 set           | Bodyweight                                                                                        |
| Step 2             | Standing hip flexion                                                                          | Not informed             | Not informed    | Elastic band                                                                                      |
| Step 2             | Standing hip abduction                                                                        | Not informed             | Not informed    | Elastic band                                                                                      |
| Step 2             | Partial frontal plane sliding lunge                                                           | 10 repetitions           | 3 sets, 2-3/day | Bodyweight                                                                                        |
| Step 2             | Partial back sliding lunge                                                                    | 10 repetitions           | 3 sets, 2-3/day | Bodyweight                                                                                        |
| Optional           | Cycling                                                                                       | 10-20 minutes            | 1 set           | Light resistance can be added when it is possible to perform a full round with the operated limb. |

Step 1 is performed in the morning and step 2 is performed in the afternoon. All exercises are performed once per day.

809 *Table 1b.* Postoperative rehabilitation program, Silkeborg Regional Hospital

| Week 0-2           |                                            |               |              |                                                 |
|--------------------|--------------------------------------------|---------------|--------------|-------------------------------------------------|
| Step               | Exercise                                   | Repetitions   | Sets         | Resistance                                      |
| Optional           | Cycling                                    | 5-10 minutes  | 2/day        | -                                               |
| -                  | Supine peristaltic pump exercise           | Not informed  | Not informed | -                                               |
| -                  | Rest with leg above heart level            | 30 minutes    | 4/day        | -                                               |
| -                  | Seated isometric knee extension            | 3 seconds     | 10 sets      | Lower leg and the foot                          |
| -                  | Seated knee flexion mobilization           | 3 seconds     | 10 sets      | -                                               |
| -                  | Seated knee extension mobilization         | 30 seconds    | 3 sets       | Apply pressure to the knee joint using the arms |
| -                  | Supine isometric knee extension            | 3 seconds     | 10 sets      | Lower leg and the foot                          |
| -                  | Supine passive knee extension mobilization |               |              | Gravity will extend the knee joint              |
| Week 2 and onwards |                                            |               |              |                                                 |
| -                  | Supine knee isometric knee towel press     | 3seconds hold | 10sets       | Lower leg and the foot                          |

1  
2  
3  
4  
5  
6  
7  
8  
9  
10  
11  
12  
13  
14  
15  
16  
17  
18  
19  
20  
21  
22  
23  
24  
25  
26  
27  
28  
29  
30  
31  
32  
33  
34  
35  
36  
37  
38  
39  
40  
41  
42  
43  
44  
45  
46  
47  
48  
49  
50  
51  
52  
53  
54  
55  
56  
57  
58  
59  
60

|   |                                    |                |         |             |
|---|------------------------------------|----------------|---------|-------------|
| - | Sit to stand                       | 10 repetitions | 1 set   | Body weight |
| - | Standing knee flexion mobilization | 3 seconds      | 10 sets | Body weight |
| - | Step Up Exercise                   | 10 repetitions | 1 set   | Body weight |

**Table 2a.** Discharge criteria at Horsens Regional Hospital

|                                                                |             |
|----------------------------------------------------------------|-------------|
| Minimum knee flexion range of motion                           | 60 degrees  |
| Maximal knee extension deficit                                 | 15 degrees  |
| In-and-out of bed                                              | Independent |
| Sit-to-stand                                                   | Independent |
| Walking with/without assistive devices                         | Independent |
| Stair negotiation with/without assistive devices               | Independent |
| Activities of daily living                                     | Independent |
| Understanding of the home-based postoperative exercise program | Sufficient  |

**Table 2b.** Discharge criteria at Silkeborg Regional Hospital

|                                                                |             |
|----------------------------------------------------------------|-------------|
| Minimum knee flexion range of motion                           | 90 degrees  |
| Maximal knee extension deficit                                 | 5 degrees   |
| In-and-out of bed                                              | Independent |
| Sit-to-stand                                                   | Independent |
| Walking with/without assistive devices                         | Independent |
| Stair negotiation with/without assistive devices               | Independent |
| Activities of daily living                                     | Independent |
| Understanding of the home-based postoperative exercise program | Sufficient  |

**Table 3.** Exercise variables for the blood-flow restricted exercise (BFRE) protocol

| Exercise variable                                 | Week 1-8                                                                                                 |
|---------------------------------------------------|----------------------------------------------------------------------------------------------------------|
| Level of LOP                                      | 60% LOP                                                                                                  |
| Sets                                              | 4                                                                                                        |
| Load intensity                                    | 30% 1RM                                                                                                  |
| Repetitions 1 <sup>st</sup> set                   | 30                                                                                                       |
| Repetitions 2 <sup>nd</sup> & 3 <sup>rd</sup> set | 15                                                                                                       |
| Repetitions 4 <sup>th</sup> set                   | To volitional failure                                                                                    |
| Contraction modes per repetition                  |                                                                                                          |
| Concentric                                        | 2 seconds                                                                                                |
| Isometric                                         | 0 seconds                                                                                                |
| Eccentric                                         | 2 seconds                                                                                                |
| Rest between repetitions                          | 0 seconds                                                                                                |
| Time under tension per repetition                 | 4 seconds                                                                                                |
| Range of movement                                 | maximum                                                                                                  |
| Rest between sets                                 | 30 seconds                                                                                               |
| Rest between sessions                             | ≥36 hours                                                                                                |
| Progression                                       | The minimal possible load (5 kilo) is added when patients perform >15 repetitions in 4 <sup>th</sup> set |

825 *Table 4. Outcome measures to be collected.*

| Outcome measures                                        | Data collection instrument        | Time-points of assessment      |
|---------------------------------------------------------|-----------------------------------|--------------------------------|
| <b>Primary outcome</b>                                  |                                   |                                |
| <b>Sit-to-stand function</b>                            | 30 seconds chair stand test       | B, S, 3 and 12 months          |
| <b>Secondary outcomes</b>                               |                                   |                                |
| <b>Ambulatory capacity</b>                              | Timed Up & Go                     | B, S, 3 and 12 months          |
| <b>Gait speed</b>                                       | 4x10-meter walk test              | B, S, 3 and 12 months          |
| <b>Isometric Knee extensor muscle strength</b>          | Handheld Dynamometer              | B, S, 3 and 12 months          |
| <b>Isometric Knee flexion muscle strength</b>           | Handheld Dynamometer              | B, S, 3 and 12 months          |
| <b>Myofiber morphology</b>                              | Muscle Biopsies                   | B, S, 3 months                 |
| <b>Myogenic stem cell content</b>                       | Muscle Biopsies                   | B, S, 3 months                 |
| <b>Pain</b>                                             | KOOS                              | B, S, 6 weeks, 3 and 12 months |
| <b>Symptoms</b>                                         | KOOS                              | B, S, 6 weeks, 3 and 12 months |
| <b>Activities of daily living</b>                       | KOOS                              | B, S, 6 weeks, 3 and 12 months |
| <b>Sports &amp; Recreation</b>                          | KOOS                              | B, S, 6 weeks, 3 and 12 months |
| <b>Quality of life</b>                                  | KOOS                              | B, S, 6 weeks, 3 and 12 months |
| <b>Socioeconomic costs</b>                              | EQ-5D                             | B, S, 6 weeks, 3 and 12 months |
| <b>Adverse Events</b>                                   | Questionnaire and medical records | 3 months                       |
| <b>Exercise compliance and progression</b>              | Physiotherapist records           | BFRE                           |
| <b>Pain during visits</b>                               | NRS for pain                      | B, BFRE, S, 3 and 12 months    |
| <b>Declining to be operated</b>                         | Questionnaire                     | 3 months                       |
| <b>Postoperative supervised physiotherapy</b>           | Questionnaire                     | 6 weeks, 3 and 12 months       |
| <b>Knee joint range of motion</b>                       | Goniometer                        | B, S, 3 and 12 months          |
| <b>Patient characteristics and related measurements</b> | Questionnaire                     | B                              |
| <b>Gender</b>                                           | Tape measure                      | B                              |
| <b>Age</b>                                              | Electronic body mass scale        | B                              |
| <b>Height</b>                                           | Questionnaire                     | B                              |
| <b>Body mass</b>                                        | Questionnaire                     | B                              |
| <b>Civil Status</b>                                     | Questionnaire                     | B                              |
| <b>Educational Level</b>                                | Questionnaire                     | B                              |
| <b>Employment Status</b>                                | Questionnaire                     | B                              |
| <b>Substance Use (alcohol, smoking)</b>                 | Questionnaire                     | B                              |
| <b>Duration of knee symptoms</b>                        | Questionnaire                     | B                              |
| <b>Pain medication during the last week</b>             | Questionnaire                     | B                              |
| <b>Co-morbidities</b>                                   | Questionnaire                     | B                              |

826

827

827

1  
2  
3  
4  
5  
6  
7  
8  
9  
10  
11  
12  
13  
14  
15  
16  
17  
18  
19  
20  
21  
22  
23  
24  
25  
26  
27  
28  
29  
30  
31  
32  
33  
34  
35  
36  
37  
38  
39  
40  
41  
42  
43  
44  
45  
46  
47  
48  
49  
50  
51  
52  
53  
54  
55  
56  
57  
58  
59  
60

## Table and figure legends

Table 1a. Step 1 is performed in the morning and step 2 is performed in the afternoon. All exercises are performed once per day.

Table 1b. All exercises are performed once per day. Cycling ergometer exercise is optional.

Table 3. LOP: Total limb occlusion pressure; RM: Repetition Maximum

Table 4. KOOS = Knee disability and Osteoarthritis Outcome Score; B = Baseline; S = 0-2 days before surgery; D = during surgery; 3 months = 3 months after TKR; 12 months = 12 after TKR; NRS = Numeric Ranking Scale of pain

Figure 1. Flow chart of the enrollment, treatment, and follow-up phases. TKR: Total Knee Replacement, BFRE: Low-load blood-flow restricted exercise

Figure 1. Patient flow

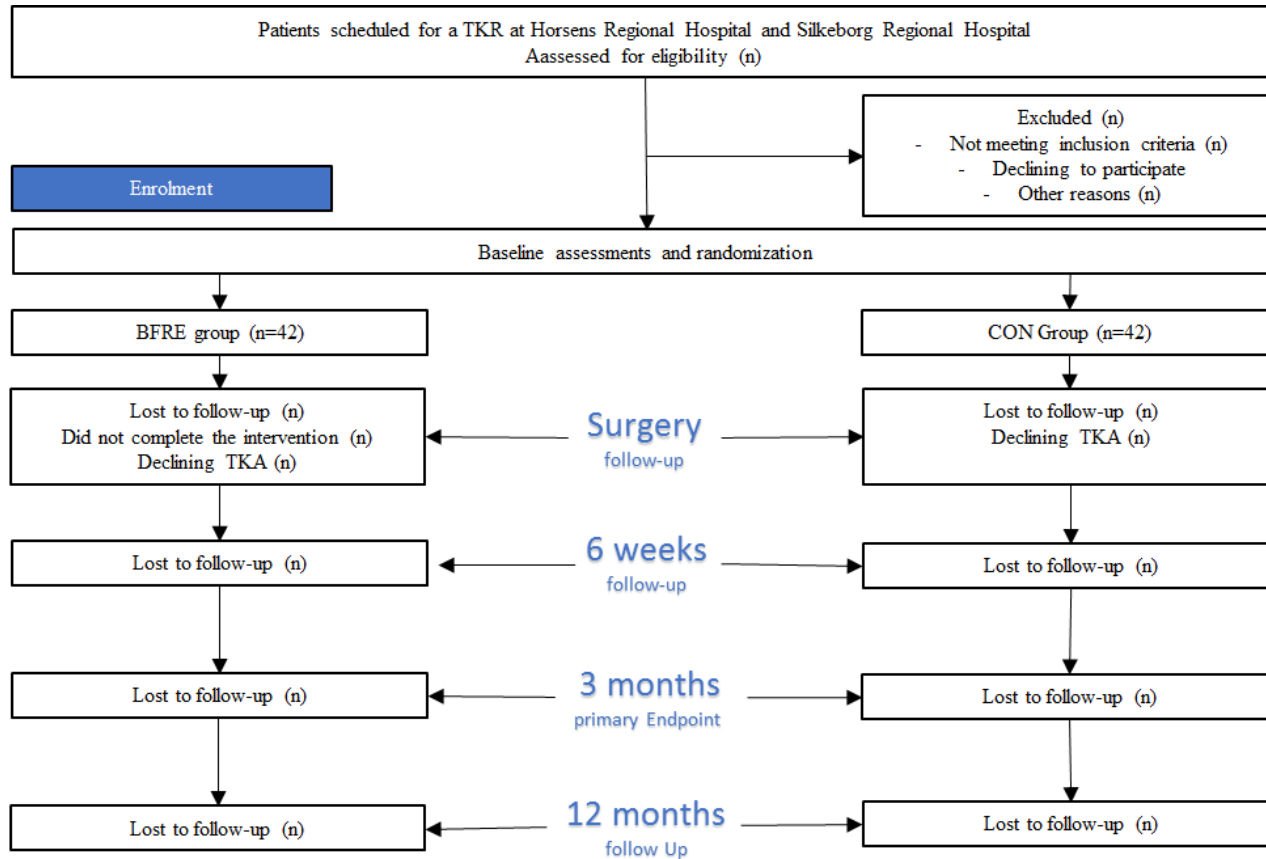



STANDARD PROTOCOL ITEMS: RECOMMENDATIONS FOR INTERVENTIONAL TRIALS

SPIRIT 2013 Checklist: Recommended items to address in a clinical trial protocol and related documents\*

| Section/item                                                    | Item No              | Description                                                                                                                                                                                                                                                                                                                                                                                                                                                                                                                                                                                                                                                                   |
|-----------------------------------------------------------------|----------------------|-------------------------------------------------------------------------------------------------------------------------------------------------------------------------------------------------------------------------------------------------------------------------------------------------------------------------------------------------------------------------------------------------------------------------------------------------------------------------------------------------------------------------------------------------------------------------------------------------------------------------------------------------------------------------------|
| <b>Administrative information</b>                               |                      |                                                                                                                                                                                                                                                                                                                                                                                                                                                                                                                                                                                                                                                                               |
| Title (p 1, I 1-3)                                              | 1                    | Descriptive title identifying the study design, population, interventions, and, if applicable, trial acronym                                                                                                                                                                                                                                                                                                                                                                                                                                                                                                                                                                  |
| Trial registration<br>A: p 2, I 56-57<br>B:                     | 2a<br>2b             | Trial identifier and registry name. If not yet registered, name of intended registry<br>All items from the World Health Organization Trial Registration Data Set                                                                                                                                                                                                                                                                                                                                                                                                                                                                                                              |
| Protocol version<br>P 1, I 22                                   | 3                    | Date and version identifier                                                                                                                                                                                                                                                                                                                                                                                                                                                                                                                                                                                                                                                   |
| Funding<br>P 21, I 494-496                                      | 4                    | Sources and types of financial, material, and other support                                                                                                                                                                                                                                                                                                                                                                                                                                                                                                                                                                                                                   |
| Roles and responsibilities<br>A: P 1, I 5-11<br>B: P 1, I 15-20 | 5a<br>5b<br>5c<br>5d | Names, affiliations, and roles of protocol contributors<br>Name and contact information for the trial sponsor<br>Role of study sponsor and funders, if any, in study design; collection, management, analysis, and interpretation of data; writing of the report; and the decision to submit the report for publication, including whether they will have ultimate authority over any of these activities<br>Composition, roles, and responsibilities of the coordinating centre, steering committee, endpoint adjudication committee, data management team, and other individuals or groups overseeing the trial, if applicable (see Item 21a for data monitoring committee) |
| <b>Introduction</b>                                             |                      |                                                                                                                                                                                                                                                                                                                                                                                                                                                                                                                                                                                                                                                                               |
| Background and rationale<br>P 3, I 67-133<br>P 3, I 70-76       | 6a<br>6b             | Description of research question and justification for undertaking the trial, including summary of relevant studies (published and unpublished) examining benefits and harms for each intervention<br>Explanation for choice of comparators                                                                                                                                                                                                                                                                                                                                                                                                                                   |
| Objectives<br>P 5, I 129-136                                    | 7                    | Specific objectives or hypotheses                                                                                                                                                                                                                                                                                                                                                                                                                                                                                                                                                                                                                                             |
| Trial design<br>P6, I 140-145                                   | 8                    | Description of trial design including type of trial (eg, parallel group, crossover, factorial, single group), allocation ratio, and framework (eg, superiority, equivalence, noninferiority, exploratory)                                                                                                                                                                                                                                                                                                                                                                                                                                                                     |

## Methods: Participants, interventions, and outcomes

|                                                          |     |                                                                                                                                                                                                                                                                                                                                                                                |
|----------------------------------------------------------|-----|--------------------------------------------------------------------------------------------------------------------------------------------------------------------------------------------------------------------------------------------------------------------------------------------------------------------------------------------------------------------------------|
| Study setting<br>P6, I 148-149                           | 9   | Description of study settings (eg, community clinic, academic hospital) and list of countries where data will be collected. Reference to where list of study sites can be obtained                                                                                                                                                                                             |
| Eligibility criteria<br>P6, I 155-163                    | 10  | Inclusion and exclusion criteria for participants. If applicable, eligibility criteria for study centres and individuals who will perform the interventions (eg, surgeons, psychotherapists)                                                                                                                                                                                   |
| Interventions<br>A: p7, I 164-240<br><br>C: p12, 283-285 | 11a | Interventions for each group with sufficient detail to allow replication, including how and when they will be administered                                                                                                                                                                                                                                                     |
|                                                          | 11b | Criteria for discontinuing or modifying allocated interventions for a given trial participant (eg, drug dose change in response to harms, participant request, or improving/worsening disease)                                                                                                                                                                                 |
|                                                          | 11c | Strategies to improve adherence to intervention protocols, and any procedures for monitoring adherence (eg, drug tablet return, laboratory tests)                                                                                                                                                                                                                              |
|                                                          | 11d | Relevant concomitant care and interventions that are permitted or prohibited during the trial                                                                                                                                                                                                                                                                                  |
| Outcomes<br>P 10, I 245-384                              | 12  | Primary, secondary, and other outcomes, including the specific measurement variable (eg, systolic blood pressure), analysis metric (eg, change from baseline, final value, time to event), method of aggregation (eg, median, proportion), and time point for each outcome. Explanation of the clinical relevance of chosen efficacy and harm outcomes is strongly recommended |
| Participant<br>timeline                                  | 13  | Time schedule of enrolment, interventions (including any run-ins and washouts), assessments, and visits for participants. A schematic diagram is highly recommended (see Figure)                                                                                                                                                                                               |
| Table 1                                                  |     |                                                                                                                                                                                                                                                                                                                                                                                |
| Sample size<br>P 17, I 391-401                           | 14  | Estimated number of participants needed to achieve study objectives and how it was determined, including clinical and statistical assumptions supporting any sample size calculations                                                                                                                                                                                          |
| Recruitment<br>P 6, I 148-151                            | 15  | Strategies for achieving adequate participant enrolment to reach target sample size                                                                                                                                                                                                                                                                                            |

## Methods: Assignment of interventions (for controlled trials)

### Allocation:

|                                         |     |                                                                                                                                                                                                                                                                                                                                                          |
|-----------------------------------------|-----|----------------------------------------------------------------------------------------------------------------------------------------------------------------------------------------------------------------------------------------------------------------------------------------------------------------------------------------------------------|
| Sequence<br>generation<br>P8, I 196-201 | 16a | Method of generating the allocation sequence (eg, computer-generated random numbers), and list of any factors for stratification. To reduce predictability of a random sequence, details of any planned restriction (eg, blocking) should be provided in a separate document that is unavailable to those who enrol participants or assign interventions |
|-----------------------------------------|-----|----------------------------------------------------------------------------------------------------------------------------------------------------------------------------------------------------------------------------------------------------------------------------------------------------------------------------------------------------------|



|    |                |     |                                                                         |
|----|----------------|-----|-------------------------------------------------------------------------|
| 1  |                |     |                                                                         |
| 2  | Allocation     | 16b | Mechanism of implementing the allocation sequence (eg, central          |
| 3  | concealment    |     | telephone; sequentially numbered, opaque, sealed envelopes),            |
| 4  | mechanism      |     | describing any steps to conceal the sequence until interventions are    |
| 5  | P8, I 196-201  |     | assigned                                                                |
| 6  |                |     |                                                                         |
| 7  | Implementation | 16c | Who will generate the allocation sequence, who will enrol participants, |
| 8  | P8, I 196-201  |     | and who will assign participants to interventions                       |
| 9  |                |     |                                                                         |
| 10 | Blinding       | 17a | Who will be blinded after assignment to interventions (eg, trial        |
| 11 | (masking)      |     | participants, care providers, outcome assessors, data analysts), and    |
| 12 | P8, I 200      |     | how                                                                     |
| 13 |                | 17b | If blinded, circumstances under which unblinding is permissible, and    |
| 14 |                |     | procedure for revealing a participant's allocated intervention during   |
| 15 |                |     | the trial                                                               |
| 16 |                |     |                                                                         |
| 17 |                |     |                                                                         |
| 18 |                |     |                                                                         |

### Methods: Data collection, management, and analysis

|    |                 |     |                                                                          |
|----|-----------------|-----|--------------------------------------------------------------------------|
| 19 |                 |     |                                                                          |
| 20 | Data collection | 18a | Plans for assessment and collection of outcome, baseline, and other      |
| 21 | methods         |     | trial data, including any related processes to promote data quality (eg, |
| 22 | P 10, I 245-420 |     | duplicate measurements, training of assessors) and a description of      |
| 23 |                 |     | study instruments (eg, questionnaires, laboratory tests) along with      |
| 24 |                 |     | their reliability and validity, if known. Reference to where data        |
| 25 |                 |     | collection forms can be found, if not in the protocol                    |
| 26 |                 | 18b | Plans to promote participant retention and complete follow-up,           |
| 27 |                 |     | including list of any outcome data to be collected for participants who  |
| 28 |                 |     | discontinue or deviate from intervention protocols                       |
| 29 |                 |     |                                                                          |
| 30 | Data            | 19  | Plans for data entry, coding, security, and storage, including any       |
| 31 | management      |     | related processes to promote data quality (eg, double data entry;        |
| 32 |                 |     | range checks for data values). Reference to where details of data        |
| 33 |                 |     | management procedures can be found, if not in the protocol               |
| 34 |                 |     |                                                                          |
| 35 | Statistical     | 20a | Statistical methods for analysing primary and secondary outcomes.        |
| 36 | methods         |     | Reference to where other details of the statistical analysis plan can be |
| 37 | P 17, I 400-420 |     | found, if not in the protocol                                            |
| 38 |                 | 20b | Methods for any additional analyses (eg, subgroup and adjusted           |
| 39 |                 |     | analyses)                                                                |
| 40 | P 17, I 400-420 | 20c | Definition of analysis population relating to protocol non-adherence     |
| 41 |                 |     | (eg, as randomised analysis), and any statistical methods to handle      |
| 42 |                 |     | missing data (eg, multiple imputation)                                   |
| 43 |                 |     |                                                                          |
| 44 |                 |     |                                                                          |
| 45 |                 |     |                                                                          |
| 46 |                 |     |                                                                          |
| 47 |                 |     |                                                                          |
| 48 |                 |     |                                                                          |

### Methods: Monitoring

|    |                 |     |                                                                      |
|----|-----------------|-----|----------------------------------------------------------------------|
| 49 |                 |     |                                                                      |
| 50 | Data monitoring | 21a | Composition of data monitoring committee (DMC); summary of its role  |
| 51 |                 |     | and reporting structure; statement of whether it is independent from |
| 52 |                 |     | the sponsor and competing interests; and reference to where further  |
| 53 |                 |     | details about its charter can be found, if not in the protocol.      |
| 54 |                 |     | Alternatively, an explanation of why a DMC is not needed             |
| 55 |                 |     |                                                                      |
| 56 |                 |     |                                                                      |
| 57 |                 |     |                                                                      |
| 58 |                 |     |                                                                      |
| 59 |                 |     |                                                                      |
| 60 |                 |     |                                                                      |

|          |     |                                                                                                                                                                                   |
|----------|-----|-----------------------------------------------------------------------------------------------------------------------------------------------------------------------------------|
|          | 21b | Description of any interim analyses and stopping guidelines, including who will have access to these interim results and make the final decision to terminate the trial           |
| Harms    | 22  | Plans for collecting, assessing, reporting, and managing solicited and spontaneously reported adverse events and other unintended effects of trial interventions or trial conduct |
| Auditing | 23  | Frequency and procedures for auditing trial conduct, if any, and whether the process will be independent from investigators and the sponsor                                       |

### Ethics and dissemination

|                                             |     |                                                                                                                                                                                                                                                                                     |
|---------------------------------------------|-----|-------------------------------------------------------------------------------------------------------------------------------------------------------------------------------------------------------------------------------------------------------------------------------------|
| Research ethics approval<br>P 18, I 423-424 | 24  | Plans for seeking research ethics committee/institutional review board (REC/IRB) approval                                                                                                                                                                                           |
| Protocol amendments                         | 25  | Plans for communicating important protocol modifications (eg, changes to eligibility criteria, outcomes, analyses) to relevant parties (eg, investigators, REC/IRBs, trial participants, trial registries, journals, regulators)                                                    |
| Consent or assent<br>P 7, I 164-173         | 26a | Who will obtain informed consent or assent from potential trial participants or authorised surrogates, and how (see Item 32)                                                                                                                                                        |
|                                             | 26b | Additional consent provisions for collection and use of participant data and biological specimens in ancillary studies, if applicable                                                                                                                                               |
| Confidentiality<br>P 11, I 265-275          | 27  | How personal information about potential and enrolled participants will be collected, shared, and maintained in order to protect confidentiality before, during, and after the trial                                                                                                |
| Declaration of interests<br>P 22, I 514     | 28  | Financial and other competing interests for principal investigators for the overall trial and each study site                                                                                                                                                                       |
| Access to data                              | 29  | Statement of who will have access to the final trial dataset, and disclosure of contractual agreements that limit such access for investigators                                                                                                                                     |
| Ancillary and post-trial care               | 30  | Provisions, if any, for ancillary and post-trial care, and for compensation to those who suffer harm from trial participation                                                                                                                                                       |
| Dissemination policy<br>P 18, 442-444       | 31a | Plans for investigators and sponsor to communicate trial results to participants, healthcare professionals, the public, and other relevant groups (eg, via publication, reporting in results databases, or other data sharing arrangements), including any publication restrictions |
| P 21, I 501-502                             | 31b | Authorship eligibility guidelines and any intended use of professional writers                                                                                                                                                                                                      |

- 1  
2 31c Plans, if any, for granting public access to the full protocol, participant-  
3 level dataset, and statistical code  
4

## 5 **Appendices**

- 6 Informed consent 32 Model consent form and other related documentation given to  
7 materials participants and authorised surrogates  
8  
9 Biological 33 Plans for collection, laboratory evaluation, and storage of biological  
10 specimens specimens for genetic or molecular analysis in the current trial and for  
11 future use in ancillary studies, if applicable  
12  
13

---

14 \*It is strongly recommended that this checklist be read in conjunction with the SPIRIT 2013  
15 Explanation & Elaboration for important clarification on the items. Amendments to the  
16 protocol should be tracked and dated. The SPIRIT checklist is copyrighted by the SPIRIT  
17 Group under the Creative Commons "[Attribution-NonCommercial-NoDerivs 3.0 Unported](#)"  
18 license.  
19  
20  
21  
22  
23  
24  
25  
26  
27  
28  
29  
30  
31  
32  
33  
34  
35  
36  
37  
38  
39  
40  
41  
42  
43  
44  
45  
46  
47  
48  
49  
50  
51  
52  
53  
54  
55  
56  
57  
58  
59  
60

# BMJ Open

**The efficacy of low-load blood flow restricted resistance EXercise in patients with Knee osteoarthritis scheduled for total knee replacement (EXKnee). Protocol for a multicenter randomized controlled trial.**

|                                 |                                                                                                                                                                                                                                                                                                                                                                                                                    |
|---------------------------------|--------------------------------------------------------------------------------------------------------------------------------------------------------------------------------------------------------------------------------------------------------------------------------------------------------------------------------------------------------------------------------------------------------------------|
| Journal:                        | <i>BMJ Open</i>                                                                                                                                                                                                                                                                                                                                                                                                    |
| Manuscript ID                   | bmjopen-2019-034376.R3                                                                                                                                                                                                                                                                                                                                                                                             |
| Article Type:                   | Protocol                                                                                                                                                                                                                                                                                                                                                                                                           |
| Date Submitted by the Author:   | 13-Aug-2020                                                                                                                                                                                                                                                                                                                                                                                                        |
| Complete List of Authors:       | Jørgensen, Stian; Regional Hospital Horsens, Department of occupational and physical therapy; Horsens Sygehus, H-HIP<br>Bohn, Marie; Horsens Sygehus, Department of Orthopedic Surgery<br>Aagaard, Per; Institute for Sports Science and Clinical Biomechanics, University of Southern Denmark,<br>Mechlenburg, Inger; Aarhus University Hospital, Department of Orthopedics; Aarhus University, Clinical Medicine |
| <b>Primary Subject Heading</b>: | Sports and exercise medicine                                                                                                                                                                                                                                                                                                                                                                                       |
| Secondary Subject Heading:      | Rehabilitation medicine                                                                                                                                                                                                                                                                                                                                                                                            |
| Keywords:                       | blood flow restriction exercise, knee osteoarthritis, total knee replacement surgery, preconditioning, functional capacity                                                                                                                                                                                                                                                                                         |
|                                 |                                                                                                                                                                                                                                                                                                                                                                                                                    |

SCHOLARONE™  
Manuscripts



I, the Submitting Author has the right to grant and does grant on behalf of all authors of the Work (as defined in the below author licence), an exclusive licence and/or a non-exclusive licence for contributions from authors who are: i) UK Crown employees; ii) where BMJ has agreed a CC-BY licence shall apply, and/or iii) in accordance with the terms applicable for US Federal Government officers or employees acting as part of their official duties; on a worldwide, perpetual, irrevocable, royalty-free basis to BMJ Publishing Group Ltd ("BMJ") its licensees and where the relevant Journal is co-owned by BMJ to the co-owners of the Journal, to publish the Work in this journal and any other BMJ products and to exploit all rights, as set out in our [licence](#).

The Submitting Author accepts and understands that any supply made under these terms is made by BMJ to the Submitting Author unless you are acting as an employee on behalf of your employer or a postgraduate student of an affiliated institution which is paying any applicable article publishing charge ("APC") for Open Access articles. Where the Submitting Author wishes to make the Work available on an Open Access basis (and intends to pay the relevant APC), the terms of reuse of such Open Access shall be governed by a Creative Commons licence – details of these licences and which [Creative Commons](#) licence will apply to this Work are set out in our licence referred to above.

Other than as permitted in any relevant BMJ Author's Self Archiving Policies, I confirm this Work has not been accepted for publication elsewhere, is not being considered for publication elsewhere and does not duplicate material already published. I confirm all authors consent to publication of this Work and authorise the granting of this licence.

1  
2  
3  
4 1 **The efficacy of low-load blood flow restricted resistance EXercise in patients with Knee**  
5 **osteoarthritis scheduled for total knee replacement (EXKnee). Protocol for a multicenter**  
6 **randomized controlled trial.**  
7  
8 3  
9 4

10  
11 5 *Stian Langgård Jørgensen*<sup>1,2,5</sup>, *Marie Bagger Bohn*<sup>2</sup>, *Per Aagaard*<sup>3</sup>, *Inger Mechlenburg*<sup>4,5</sup>  
12  
13 6

14  
15 7 <sup>1</sup>Department of Occupational and Physical Therapy, Horsens Regional Hospital, Denmark

16 8 <sup>2</sup>H-HIP, Department of Orthopedic Surgery, Horsens Regional Hospital, Denmark

17  
18 9 <sup>3</sup>Department of Sports Science and Clinical Biomechanics, University of Southern Denmark

19  
20 10 <sup>4</sup> Department of Orthopedic Surgery, Aarhus University Hospital, Denmark

21  
22 11 <sup>5</sup>Department of Clinical Medicine, Aarhus University, Denmark  
23  
24  
25  
26  
27  
28  
29

15 Corresponding Author:

16 Name: PhD student Stian Langgård Jørgensen

17 Address: Horsens Regional Hospital, Sundvej 30C, DK-8700 Horsens

18 E-mail: [stiajo@rm.dk](mailto:stiajo@rm.dk)  
19  
20  
21  
22  
23  
24

20 Phone: +45 22 71 17 82  
21  
22  
23  
24

23 Word count: 5.650  
24  
25  
26  
27  
28  
29  
30  
31  
32  
33  
34  
35  
36  
37  
38  
39  
40  
41  
42  
43  
44  
45  
46  
47  
48  
49  
50  
51  
52  
53  
54  
55  
56  
57  
58  
59  
60

## 25 ABSTRACT

### 26 Introduction

27 Up to 20% of patients undergoing total knee replacement (TKR) surgery report no or suboptimal  
28 pain relief after TKR. Moreover, despite chances of recovering to preoperative functional levels,  
29 patients receiving TKR have demonstrated persistent deficits in quadriceps strength and functional  
30 performance compared to healthy aged-matched adults. We intend to examine if low-load blood  
31 flow restricted exercise (BFRE) is an effective preoperative method to increase functional capacity,  
32 lower limb muscle strength and self-reported outcomes after TKR. In addition, the study aims to  
33 investigate to which extent preoperative BFRE will protect against surgery-related atrophy three  
34 months after TKR.

### 36 Methods

37 In this multicenter, randomized controlled and assessor blinded trial, 84 patients scheduled for TKR  
38 will be randomized to receive usual care and eight weeks of preoperative BFRE or to follow usual  
39 care-only. Data will be collected before randomization, three-four days prior to TKR, six weeks,  
40 three months, and 12 months after TKR. Primary outcome will be the change in 30-second chair  
41 stand test from baseline to three-month follow-up. Key secondary outcomes will be Timed Up &  
42 Go, 40-meter fast-paced walk test, isometric knee extensor and flexor strength, patient-reported  
43 outcome, and selected myofiber properties.

44 Intention-to-treat principle and per protocol analyses will be conducted. A one-way analysis of  
45 variance model will be used to analyze between group mean changes. Pre-to-post intervention  
46 comparisons will be analyzed using a mixed linear model. Also, paired student t-tests will be  
47 performed to gain insight into the potential pre-to-post training differences within the respective

1  
2  
3  
4 48 training or control groups and regression analysis will be used for analyzation of associations  
5  
6 49 between selected outcomes.  
7  
8

9 50

### 11 51 **Ethical approval**

12  
13 52 The trial has been accepted by the Central Denmark Region Committee on Biomedical Research  
14  
15 53 Ethics (Journal No 10-72-19-19) and the Danish Data Protection Agency (Journal No 652164). All  
16  
17 54 results will be published in international peer-reviewed scientific journals regardless of positive,  
18  
19 55 negative or inconclusive results.  
20  
21  
22

23 56

### 25 57 **Trial registration**

26  
27 58 The trial is registered at Clinical Trials (NCT04081493)  
28  
29

30 59

### 32 60 **Article Summary**

#### 34 61 **Strengths and limitations of this study**

- 35  
36 62 • The trial is a multicenter, randomized controlled assessor blinded trial.  
37  
38 63 • This is the first clinical trial to investigate the effect of low-load ischemic resistance training  
39  
40 64 as a preconditioning method prior to elective knee replacement surgery.  
41  
42 65 • Patients will not be blinded to their allocation into intervention groups (BFR vs. control)  
43  
44 66 • This is a protocol paper  
45  
46  
47

48 67

### 50 68 **Key words**

51  
52 69 Blood flow restricted exercise, knee osteoarthritis, total knee replacement surgery, preconditioning  
53  
54  
55  
56  
57  
58  
59  
60



## 70 INTRODUCTION

71 Knee OA is a degenerative joint disease associated with pain, reduced physical activity, and quality  
72 of life and affects almost 40% of all individuals  $\geq 60$  years of age (1-5). Approaching end-stage knee  
73 OA, total knee replacement (TKR) is often the preferred treatment choice to reduce pain and regain  
74 functional capacity. That is, TKR is considered a highly successful treatment to improve quality of  
75 life and long-term function (6). However, despite being considered highly successful,  
76 approximately 20% of the patients undergoing TKR experience a suboptimal outcome (6), which  
77 has often been suggested to be related to incomplete restoration of physical function (7). In  
78 addition, TKR patients typically demonstrate long-lasting deficits in quadriceps strength and  
79 functional performance (2, 4). This failure to return to “normal” strength levels has been suggested  
80 to be associated with preoperatively lower limb muscle strength and function (2).

81 Preconditioning exercise designed to prepare the musculoskeletal system to better tolerate  
82 stressful events such as the impact of invasive surgery has been suggested to be applicable prior to  
83 elective TKR (6). This is supported by the results of two randomized controlled trials indicating that  
84 preoperative heavy resistance strength training (HRST) may enhance functional capacity and knee  
85 extensor muscle strength three months postoperatively (7, 8). Joint pain resulting from the high  
86 mechanical loads associated with HRST may represent a barrier to this type of training in some  
87 patients suffering from severe knee OA (1, 9). Therefore, a more tolerable, yet effective, alternative  
88 is needed for this population. Also, three recent systematic reviews investigating the topic of  
89 preoperative physiotherapy-based exercise before TKR all warrant high quality, well-powered  
90 evidence to investigate the efficacy of preoperative physiotherapy before TKR (10-12).

91 Resistance training with low exercise loads ( $\sim 30\%$  1 repetition maximum) performed with  
92 concurrent partial blood flow restriction to the working limb (Blood flow restricted exercise: BFRE)  
93 has received increasing clinical interest during the last decade (1, 13-32). The application of low

1  
2  
3  
4 94 muscle/tendon/joint forces in BFRE has been documented to increase human skeletal muscle size  
5  
6 95 and to cause substantial strength gain in healthy young and old individuals, as well as some patient  
7  
8  
9 96 populations, despite the low magnitude of mechanical stress imposed on the trained tissue (13, 25,  
10  
11 97 26). When applied in the clinical setting, BFRE has demonstrated positive effects on skeletal  
12  
13 98 muscle hypertrophy, strength, and functional capacity in mild-degree knee OA patients (1, 9, 33,  
14  
15 99 34) although not observed in all studies (33). Importantly, BFRE appears to be feasible with a high  
16  
17  
18 100 training adherence in knee OA patients (1, 33, 34). The use of different restrictive pressures  
19  
20 101 (absolute restrictive pressures: 160-200 mmHg and individualized pressure of 70%; the pressure  
21  
22 102 needed to provide complete blood flow restriction (total limb occlusion pressure: LOP) has been  
23  
24  
25 103 applied without any adverse events in mild-degree knee OA (1, 33, 34). This is in line with Hughes  
26  
27 104 et al. (13), who suggested that when BFRE is performed correctly, it has been demonstrated to be as  
28  
29  
30 105 safe as free-flow exercise methods (13).

31  
32 106 Currently, no consensus exists about the appropriate restrictive pressure to induce favorable  
33  
34 107 muscle adaptation in patients suffering from knee OA. This might be due to the fact that the  
35  
36 108 effective occlusion pressure seems to be dictated by the exercise load/intensity (35). Thus, the  
37  
38  
39 109 effective occlusion pressure varies between studies due to use of different exercises or differences  
40  
41 110 in exercise load and intensity. Restrictive pressures ranging from 40%-80% of total arterial leg  
42  
43 111 occlusion pressure (LOP) have been suggested to be sufficient to evoke muscular adaptation in  
44  
45 112 healthy adults (14, 17, 18, 36). If the load is less than 30% 1RM, higher restrictive pressures seems  
46  
47  
48 113 required to evoke muscle hypertrophy, while lower pressures (40% LOP) requires training loads of  
49  
50 114 30% 1RM or above to be performed (36). Injury or joint pain (i.e. from the knee) might limit the  
51  
52  
53 115 amount of resistance applied during strength testing, and may thus compromise the ability to rely  
54  
55 116 fully on a given 30% 1RM estimation. Therefore, higher pressures than 40% LOP are suggested to  
56  
57 117 be used in clinical settings (36). On the other hand, higher pressures are associated with more  
58  
59  
60

1  
2  
3  
4  
5  
6  
7  
8  
9  
10  
11  
12  
13  
14  
15  
16  
17  
18  
19  
20  
21  
22  
23  
24  
25  
26  
27  
28  
29  
30  
31  
32  
33  
34  
35  
36  
37  
38  
39  
40  
41  
42  
43  
44  
45  
46  
47  
48  
49  
50  
51  
52  
53  
54  
55  
56  
57  
58  
59  
60

discomfort during exercise and in between-set rest pauses (14), which potentially can affect exercise motivation negatively in patients. Thus, an occlusion pressure sufficiently high to evoke measurable muscle adaptation despite potentially exercising at loads lower than 30% 1RM; yet tolerable to maintain a high adherence, seems a favorable choice for this particular patient population.

The adaptive mechanisms evoked by BFRE seem to involve accumulation of metabolites, ischemia (transient tissue hypoxia), which may increase recruitment of higher threshold (Type II) fibers through stimulation of group III and IV afferent nerve fibers (37, 38), and also activation of myogenic muscle stem cells (satellite cells: SC) (13, 26, 31). SC are cells positioned between the sarcolemma and the myofiber basal lamina (31, 39). SC play an important role in human skeletal muscle growth due to their ability to donate new myonuclei to the muscle fibers (31, 40-44). That is, the human skeletal muscle fibers are multinucleated cells with each myonucleus controlling the protein synthesis of a certain cytoplasmatic area in the muscle fiber (40-42, 45). Myonuclei transcriptional activity can be fully maximized with exercise, hence requiring new myonuclei to support further muscle tissue accretion (41, 42, 44). It has been suggested that exercise-related addition of SC and myonuclei by means of BFRE might reduce the muscle atrophy related to bedrest and/or prolonged inactivity (31, 46). Previous studies applying short term (10 days) preoperative BFRE before an anterior cruciate ligament rupture-reconstruction found no atrophy protective effect or higher postoperative muscle strength compared to performing a low-load exercise without blood flow restriction (placebo). However, it might be questionable if the applied training frequency, intensity and training period have been sufficient to promote SCs and myonuclei addition. Thus, longer periods of intensive training might be necessary to promote the desired muscle morphological adaptations (addition of myonuclei and increased SC content).

### **Aim and hypothesis of the trial**

1  
2  
3  
4 142 The primary aim of this trial is to investigate the efficacy of eight weeks of BFRE compared to  
5  
6  
7 143 receiving usual care prior to TKR on postoperative chair stand performance. We hypothesize that  
8  
9 144 eight weeks of preoperative BFRE will lead to increased 30 second chair stand performance (30-  
10  
11 145 second Chair Stand Test: 30-s CST) when assessed three months postoperatively. Secondary aims  
12  
13  
14 146 are to investigate the efficacy of preoperative BFRE on lower limb muscle strength three months  
15  
16 147 after TKR and investigate the potential relationship to functional capacity and quality of life.  
17  
18 148 Furthermore, it will be investigated to which extent eight weeks of BFRE induce myofiber  
19  
20 149 hypertrophy and gain in satellite cell number and myonuclei content in the knee extensor  
21  
22  
23 150 musculature.  
24  
25 151

## 27 152 **MATERIAL & METHODS**

### 30 153 **Design**

31  
32 154 The trial is designed as a multicenter (two sites), randomized, assessor blinded, controlled trial  
33  
34 155 following the CONSORT guidelines (47). Primary endpoint will be three months after TKR.  
35  
36 156 Additional and secondary endpoints will be evaluated during the week of TKR, six weeks after  
37  
38  
39 157 TKR (questionnaires only) and 12 months after TKR. Muscle biopsies will be obtained from all  
40  
41 158 patients undergoing surgery at Horsens Regional Hospital at baseline, during surgery and three  
42  
43 159 months after TKR.  
44  
45  
46 160

### 48 161 **Participants**

49  
50 162 Patients will be recruited from the Departments of Orthopedic Surgery at Horsens and Silkeborg  
51  
52  
53 163 Regional Hospitals in Denmark. Patient enrollment will start September 2<sup>nd</sup> 2019 at Horsens  
54  
55 164 Regional Hospital and October 1<sup>st</sup> 2019 at Silkeborg Regional Hospital. Patient recruitment is  
56  
57 165 expected to be completed in June 2021. All patients are expected to have completed baseline testing  
58  
59  
60

1  
2  
3  
4  
5  
6  
7  
8  
9  
10  
11  
12  
13  
14  
15  
16  
17  
18  
19  
20  
21  
22  
23  
24  
25  
26  
27  
28  
29  
30  
31  
32  
33  
34  
35  
36  
37  
38  
39  
40  
41  
42  
43  
44  
45  
46  
47  
48  
49  
50  
51  
52  
53  
54  
55  
56  
57  
58  
59  
60

166 in September 2021. To account for surgery and intervention, the three-month follow-up will be  
167 concluded in April 2022. Thus, at the end of September 2022 all patients are expected to have  
168 completed 12-month follow-up testing.

169  
170 Inclusion criteria: 1) Patients  $\geq 50$  years scheduled for TKR due to knee OA at Horsens- or  
171 Silkeborg Regional Hospital.

172  
173 Exclusion criteria: 1) Severe cardiovascular diseases (New York Heart Association (NYHA) class  
174 III and IV), previous stroke incident, thrombosis incident; 2) traumatic nerve injury in affected limb  
175 3) unregulated hypertension (systolic  $\geq 180$  or diastolic  $\geq 110$  mmHg) 4) spinal cord injury; 5)  
176 planned other lower limb surgery within 12 months; 6) cancer diagnosis and currently undergoing  
177 chemo-, immuno-, or radiotherapy; 7) inadequacy in written and spoken Danish; 8) an existing  
178 prosthesis in the index limb; 9) living more than 45 minutes from either Horsens Regional Hospital  
179 or Silkeborg Regional Hospital; 10) pregnancy.

180  
181 *Please insert figure 1 around here*

182  
183 All patients will be screened for eligibility by four orthopedic chief physicians at Horsens Regional  
184 Hospital and by three orthopedic chief physicians at Silkeborg Regional Hospital who will perform  
185 the initial inclusion of study participants and hand out written project information. All patients  
186 accepting to participate will be asked to complete a written informed consent allowing the  
187 physiotherapist (at Horsens Regional Hospital and Silkeborg Regional Hospital) to contact the  
188 patients by phone for a final eligibility and exclusion criteria-screening and book an appointment  
189 for baseline testing. If the patient agrees to participate in the trial, he/she will sign a written

1  
2  
3  
4 190 informed consent to participate in the project. Subsequently, the patient will be baseline-tested at  
5  
6  
7 191 the hospital by a blinded (to group allocation) assessor. Patients declining to participate in the RCT  
8  
9 192 will be offered the option of participating in a parallel observational cohort trial. All patients  
10  
11 193 included in the project will be scheduled for a TKR. Two-three weeks before surgery all patients  
12  
13  
14 194 will be invited to a, preoperative information meeting where nurses, surgeons, and physiotherapists  
15  
16 195 will provide detailed information on pain management, nutrition, the surgical procedure, physical  
17  
18 196 activity, postoperative home-based rehabilitation (table 1a and 1b), load management, etc. (usual  
19  
20  
21 197 care) (48). On the day of surgery, patients will be hospitalized at Horsens Regional Hospital or  
22  
23 198 Silkeborg Regional Hospital where an orthopedic chief physician will perform the TKR procedure.  
24  
25 199 The day after surgery all patients will receive physiotherapy-supervised training once or twice per  
26  
27 200 day by a physiotherapist in order to fulfill the discharge criteria (table 2a and 2b) (48). Patients will  
28  
29  
30 201 generally be discharged within ~one-two days after fulfilling all the discharge criteria listed above.  
31  
32 202 After discharge, all patients will receive a standard home-based rehabilitation program focusing on  
33  
34 203 improving knee joint mobility, increasing the tolerance for standing without assistive devices, and  
35  
36  
37 204 lower extremity muscle strength. Variations in the selection of exercises and exercise variables exist  
38  
39 205 in the standard home-based rehabilitation programs between the respective hospitals; however, the  
40  
41 206 purpose of the programs is identical. If the patients do not fulfill the discharge criteria, they will be  
42  
43  
44 207 offered supervised knee-specific exercise therapy at a municipal rehabilitation center or specialized  
45  
46 208 hospital-based rehabilitation after discharge from the hospital.  
47  
48 209  
49

50 210 *Please insert table 1a and 1 b about here*  
51

52  
53 211  
54  
55 212 *Please insert table 2a and table 2b around here*  
56  
57 213  
58  
59  
60

1  
2  
3  
4 **214 Randomization**

5  
6 215 After baseline assessment, patients will be randomized (1:1) using the Research Electronic Data  
7  
8  
9 216 Capture (REDCap) randomization system to either the training (BFRE) group or the control (CON)  
10  
11 217 group. Prior to randomization, all patients will be booked for follow-up test sessions and surgery.  
12  
13 218 All randomization procedures will be performed by the physiotherapists in charge of the BFRE  
14  
15  
16 219 training. Assessors performing the tests will be blinded to group allocation until completion of the  
17  
18 220 trial. A flow chart of the patient allocation procedures is depicted in Figure 1.  
19

20  
21 221  
22  
23 222 CON group: Participants in CON will receive usual care (see above) prior to TKR and be  
24  
25 223 encouraged to continue their usual lifestyle up until TKR.  
26

27 224  
28  
29 225 BFRE group: In addition to receiving usual care (cf. above), participants in the BFRE group will  
30  
31 226 perform supervised BFRE sessions three times per week for eight weeks supervised by a  
32  
33  
34 227 physiotherapist educated in administering BFRE. All BFRE training will be performed at Horsens  
35  
36 228 Regional Hospital and Silkeborg Regional Hospital.  
37

38  
39 229  
40  
41 230 **Intervention procedures**

42  
43 231 BFRE

44  
45 232 Each BFRE session will consist of a 10-minute warm up (ergometer cycling) followed by two  
46  
47  
48 233 different unilateral lower-limb resistance training exercises: 1) leg press and 2) knee extension  
49  
50 234 performed on standard strength training machines. Each exercise will be performed with the  
51  
52 235 affected lower limb only and consist of four rounds interspaced by 30 seconds of rest (table 3). First  
53  
54  
55 236 round: 30 repetitions (reps); second round: 15 reps; third round: 15 reps; fourth round: until  
56  
57 237 exhaustion (Table 1). If patients can perform more than 15 repetitions in the fourth exercise set, the  
58  
59 238 exercise load will be increased with the minimum extra load possible (30). Participants will be  
60

1  
2  
3  
4 239 instructed to perform both the eccentric and concentric contraction phases using a steady 2-second  
5  
6 240 pace duration. The fourth and final exercise set will be performed to the point of exhaustion defined  
7  
8  
9 241 as being unable to complete the final concentric contraction phase in 2 seconds. During the 30  
10  
11 242 second rest period, patients will rest in a standardized resting position while maintaining the initial  
12  
13 243 cuff-pressure. Between each exercise, patients will have a 5-minute "free-flow" rest period. The 5  
14  
15  
16 244 minutes rest period applied between exercises was chosen based on experiences from a previous  
17  
18 245 pilot project (Jorgensen & Bohn 2019, unpublished data) and experience with applying BFRE in  
19  
20 246 clinical practice. In both situations, we often experienced that patients stayed seated in the leg press  
21  
22  
23 247 machine for >2 minutes after the last (fatiguing) set to feel sufficiently rested and confident to walk  
24  
25 248 from one exercise machine to another. The cuff will be released immediately after completion of the  
26  
27 249 final exercise set.

28  
29  
30 250 The occlusion pressure during both exercises will be set at 60% of total limb occlusion pressure  
31  
32 251 (LOP) and the starting load intensity will be 30% with 1 repetition maximum (1RM) in both  
33  
34 252 exercises.

35  
36 253 Individual LOP will be determined using a pneumatic, conically shaped, 12 cm wide, rigid cuff  
37  
38  
39 254 (Occlude Aps, Denmark) attached to the patient's most proximal area of the thigh on the affected  
40  
41 255 side. While sitting on an examination table with the ankle and 1/3 of the lower limb off the table, a  
42  
43 256 vascular Doppler probe (EDAN Instruments, inc., China) will be placed posterior to the medial  
44  
45  
46 257 malleolus over the posterior tibial artery to capture the auscultatory pulse. To determine the cuff  
47  
48 258 pressure (mmHg) needed for total blood flow occlusion, the cuff will gradually be inflated in 20  
49  
50 259 mmHg steps until reaching the pressure where the auscultatory pulse is interrupted (LOP). The first  
51  
52  
53 260 time the auscultatory pulse is interrupted, the examiner releases 10-20 mmHg pressure from the cuff  
54  
55 261 until the auscultatory pulse is present again. When the auscultatory pulse reappears, the cuff is  
56  
57 262 inflated with 10 mmHg until the LOP is found again. If the second LOP is identical to the first, it  
58  
59  
60



1  
2  
3  
4  
5  
6  
7  
8  
9  
10  
11  
12  
13  
14  
15  
16  
17  
18  
19  
20  
21  
22  
23  
24  
25  
26  
27  
28  
29  
30  
31  
32  
33  
34  
35  
36  
37  
38  
39  
40  
41  
42  
43  
44  
45  
46  
47  
48  
49  
50  
51  
52  
53  
54  
55  
56  
57  
58  
59  
60

263 will be defined as the LOP for that specific patient. Otherwise, the procedure will be repeated until  
264 determining an identical LOP two consecutive times.

*Please insert Table 3 about here*

### **Outcome variables**

269 Outcome assessments will be performed at baseline (before randomization), three-four days before  
270 surgery, six weeks after TKR, three months after TKR, and 12 months after TKR. To reduce the  
271 number of postoperative visits, only questionnaires; The Knee disability and Osteoarthritis Outcome  
272 Score (KOOS), EuroQol Group 5-dimensions (EQ-5D-L5) and reporting of adverse event or  
273 receiving supervised physiotherapy postoperatively will be sent via email six weeks after surgery.  
274 Two testers (two trained physiotherapists) blinded to group allocation will perform all baseline and  
275 follow-up measurements. Bergström needle muscle biopsies (49) will be taken from vastus lateralis  
276 of the quadriceps muscle in both lower limbs from patients included at Horsens Regional Hospital  
277 only at baseline, during surgery, and three months after TKR by doctors trained in performing the  
278 procedure. An overview of the data collection parameters is presented in Table 4.

279 Before starting the baseline testing, all assessors will be thoroughly trained in performing  
280 the tests according to the standardized test procedures for each test method. All assessors will be  
281 blinded to intervention allocation (pre surgery BFRE training or usual care). Further, assessors will  
282 be trained in how to communicate with the participants at follow-up test sessions to avoid break of  
283 blinding due to miscommunication. Also, all cases where blinding is being broken will be  
284 registered. Also, the physiotherapist in charge of LL-BFRE will be thoroughly trained in  
285 performing the exercise on healthy subjects before applying LL-BFRE on study-patients. At the last  
286 scheduled exercise session (i.e. 24th session), the physiotherapists in charge of LL-BFRE will

carefully remind the participants not to reveal their group allocation to any assessors at any time point during post testing.

The primary investigator will be in weekly contact with the physiotherapists supervising the LL-BFRE at Horsens Regional Hospitalet and Silkeborg Regional Hospital where day-to-day-retraining and supervision can be arranged. Furthermore, physiotherapists supervising the LL-BFRE will receive in-depth retraining every three months.

## Outcomes

*Please insert Table 4 about here*

### *Primary outcome*

**The 30s-CST** will be assessed using a 44 cm (seat height) chair with armrests. The 30s-CST measures the number of sit-to-stand repetitions completed within 30 seconds. The 30s-CST is considered a valid and sensitive measure of lower-extremity sit-to-stand function with good to excellent intra- and inter-observer reliability (50-52).

### *Secondary outcomes*

**The Timed Up & Go test (TUG)** assesses the time required for patients to stand from a 44 cm (seat height) chair walk around a tape mark 3 meters away and sit into the chair at return. The patients will be instructed to walk as fast and safely as possible towards the tape mark (and touch the tape mark (with at least one foot), turn around and return to the chair and sit down. Use of armrests is allowed. The fastest of two trials will be used for further analysis. Up to one minute of

1  
2  
3  
4  
5  
6  
7  
8  
9  
10  
11  
12  
13  
14  
15  
16  
17  
18  
19  
20  
21  
22  
23  
24  
25  
26  
27  
28  
29  
30  
31  
32  
33  
34  
35  
36  
37  
38  
39  
40  
41  
42  
43  
44  
45  
46  
47  
48  
49  
50  
51  
52  
53  
54  
55  
56  
57  
58  
59  
60

rest will be allowed between trials (53, 54). Good inter-rater reliability has been demonstrated with the TUG test (52).

**4x10 meter walk test (40m-FWT)** measures the total time it takes to walk 4 x 10 meters excluding turns (meter/sec) (52). Patients will be instructed to walk as quickly and as safely as possible without running to a visible mark 10 meters away, return and repeat for a total distance of 40 meters (52). Prior to the test, one practice trial will be provided to check understanding. The 40m-FWT is a valid and responsive measure for assessing short distance maximum walking speed with excellent inter-rater reliability (52).

**1RM leg press strength** will be estimated from a 5-8RM leg press test. Patients perform three low-load warm-up sets. The first and second warm-up sets consist of 12 repetitions, and the third warm-up set consists of eight repetitions. The load of each warm-up set will be increased with 10 kilos. After warm-up, the load will be increased to determine the 5RM. If the 5RM cannot be determined within three trials, a fourth all-out trial (as many repetitions as possible) will be performed. The 1RM will be calculated as  $[1RM = \text{load (kg)} / 1.0278 - 0.0278 \cdot \text{number of repetitions}]$  (55).

**1RM knee extension strength** will be estimated from 5-8RM knee extension test as described above for the estimation of 1RM leg press test (55).

**Maximal isometric voluntary contraction (MVC) of the knee** will be measured using a handheld dynamometer (HHD). The patients will be seated on an examination table with knees and hips positioned at 90° flexion. The patients will be instructed to remain seated in an upright position and place both hands on the shoulder to avoid compensation. The HHD will be fixed with a rigid belt to the examination table. Adjustable straps will be used to allow MVCs of the knee extensors to be performed at 90° knee flexion in all patients. The HHD will be positioned 5 cm above the medial

1  
2  
3  
4  
5  
6  
7  
8  
9  
10  
11  
12  
13  
14  
15  
16  
17  
18  
19  
20  
21  
22  
23  
24  
25  
26  
27  
28  
29  
30  
31  
32  
33  
34  
35  
36  
37  
38  
39  
40  
41  
42  
43  
44  
45  
46  
47  
48  
49  
50  
51  
52  
53  
54  
55  
56  
57  
58  
59  
60

336 malleolus (56). The patients will be instructed to produce as much force as possible into the HHD.

337 Good to excellent inter- and intra-rater reliability has previously been demonstrated on group-level

338 in patients suffering from knee OA for maximum knee extensor muscle strength testing with HDD

339 (56, 57). Patients will receive four trials. For analysis, the mean maximal strength of the second,

340 third and fourth measures will be calculated and corrected for bodyweight (56)

341

342 **MVC of the knee flexors** will be measured and performed using HHD at 90° knee flexion with the

343 patients seated identically as during MVC for the knee extensors (56). The HHD will be positioned

344 posterior aspect of calcaneus (56) and patients will be instructed to produce as much force as

345 possible into the HHD. Good to excellent inter- and intra-rater reliability has previously been

346 demonstrated on group-level in patients suffering from knee OA for maximum knee flexor muscle

347 strength testing with HDD (56). Patients will receive four trials. For analysis, the mean maximal

348 strength of the second, third and fourth measures will be calculated and corrected for bodyweight

349 (56)

350

351 **Myofiber cross sectional area (CSA), muscle fiber type composition, satellite cell content, and**

352 **myonuclei number** will be assessed by obtaining needle biopsies (100-150 mg) from all patients

353 enrolled at Horsens Regional Hospital. The biopsies will be obtained bilaterally from the middle

354 portion of the vastus lateralis muscle utilizing the percutaneous needle biopsy technique of

355 Bergström (49, 58, 59). Biopsies will be performed by two experienced orthopedic surgeons (chief

356 physicians) trained in performing the needle muscle biopsy technique at Horsens Regional Hospital.

357 Efforts will be made to extract tissue from the same region (2-3 cm apart) and depth (~1-2 cm.)

358 (49). The tissue samples will be dissected of all visible blood, adipose tissue, and connective tissue

359 and mounted in Tissue-Tec (4583, Sakura Finetek, Alphen aan den Rijn, The Netherlands), frozen

1  
2  
3  
4 360 in isopenate pre-cooled with liquid nitrogen, and stored at -80°C (31, 49, 60). All muscle samples  
5  
6  
7 361 will be analyzed as previously described by Nielsen et al. (31) using immunofluorescence  
8  
9 362 microscopy. Transverse serial sections (8 µm) of the embedded muscle biopsy specimen will be cut  
10  
11 363 at -22°C using a cryostat (HM560; Microm, Walldorf, Germany) and will be mounted on glass  
12  
13  
14 364 slides for subsequent analysis as described in detail elsewhere (31). Myogenic stem cells (satellite  
15  
16 365 cells (SC)) will be visualized with an antibody against Pax7 (31). Type I (stained) and Type II  
17  
18 366 (unstained) myofibers will be differentiated, and muscle fiber area will be determined (31); MSC-  
19  
20  
21 367 derived nuclei will stain positive for Pax7 and be within the basal lamina; nuclei (DAPI stained)  
22  
23 368 with a sublaminar placement will be considered myonuclei (31).

24  
25 369  
26  
27 370 **Knee disability and Osteoarthritis Outcome Score (KOOS)** is a patient-administered knee  
28  
29  
30 371 specific questionnaire comprising five subscales: Pain; Symptoms; Activities of daily living; Sport  
31  
32 372 & Recreation; and Knee-Related Quality of Life. Each item is scored from 0 to 4 (61). The raw  
33  
34 373 score for each of the five subscales is the total sum of the associated item scores. Scores can be  
35  
36  
37 374 transformed to a 0 to 100 scale. The scores of the five subscales can be expressed as a composite  
38  
39 375 outcome profile, higher scores indicating fewer problems (62). The KOOS questionnaire is valid  
40  
41 376 and reliable in patients suffering from knee OA and patients on the waiting list for TKA for knee  
42  
43  
44 377 OA (61, 63, 64).

45  
46  
47  
48  
49  
50  
51  
52  
53  
54  
55  
56  
57  
58  
59  
60

1  
2  
3  
4  
5  
6  
7  
8  
9  
10  
11  
12  
13  
14  
15  
16  
17  
18  
19  
20  
21  
22  
23  
24  
25  
26  
27  
28  
29  
30  
31  
32  
33  
34  
35  
36  
37  
38  
39  
40  
41  
42  
43  
44  
45  
46  
47  
48  
49  
50  
51  
52  
53  
54  
55  
56  
57  
58  
59  
60

378

379

380

381

382

383

384

385

386

387

388

389

390

391

392

393

394

395

396

397

398

399

400

**EuroQol Group 5-dimension (EQ-5D-5L)** is a self-completion questionnaire consisting of two parts; the first part of the EQ-5D-5L comprises five dimensions involving mobility, self-care, usual activities, pain/discomfort, and anxiety/depression. All dimensions have five response categories (no problems, slight problems, moderate problems, severe problems, and extreme problems) resulting in a five digit descriptive health state (65), which will be converted into a summary index ranging from -0.624 (worst) to 1.000 (best), using a Danish value set (66). The second part, EQ-VAS rates the overall current health status from 0 (worst imaginable health) to 100 (best imaginable health) (65). The EQ-5D-5L is reliable and valid in patients with knee OA eligible for TKA (67, 68).

**Adverse events** will be defined as unpredicted or unintended events, signs, or disease occurring during the period from inclusion until the 3-month follow-up (primary end-point) resulting in contact with the healthcare system (hospital or general practitioner) independent of whether or not the event is related to the intervention or outcome assessments. Adverse events will be recorded and categorized in accordance with the definitions established by the United States Food and Drug Administration [88]. Continuous registration of adverse events will be performed and a short open-ended questionnaire will be administered at three months follow-up.

#### *Other Outcome Measures*

**Blood pressure** will be measured by the orthopedic chief physicians when patients are visiting the outpatient clinic. Blood pressure will be used to determine eligibility to participate in the project.

1  
2  
3  
4  
5  
6  
7  
8  
9  
10  
11  
12  
13  
14  
15  
16  
17  
18  
19  
20  
21  
22  
23  
24  
25  
26  
27  
28  
29  
30  
31  
32  
33  
34  
35  
36  
37  
38  
39  
40  
41  
42  
43  
44  
45  
46  
47  
48  
49  
50  
51  
52  
53  
54  
55  
56  
57  
58  
59  
60

401 **Exercise compliance and progression** will be obtained by the physiotherapist in charge of the  
402 training sessions and entered directly into the REDCap-system. The progression will be monitored  
403 as the total load lifted by the patient for exercise session.

404  
405 **Numeric rating scale for pain** is a segmented unidimensional 11-item measure of pain intensity in  
406 adults (69) that will be used to rate pain intensity during both testing and exercise sessions. (69). 0  
407 represents no pain while 10 represents worst pain imaginable (69).

408  
409 **Declining to be operated** will be measured at three month follow-up, where patients will be asked  
410 whether they decided to be operated or not. Patients who declined to be operated will be invited to  
411 participate in all prescheduled follow-up assessments.

412  
413 **Postoperative supervised physiotherapy** will be measured at six week, three month, and 12 month  
414 follow-up by answering a questionnaire. If patients have participated in postoperative supervised  
415 physiotherapy, the patient must specify whether the treatment was related to the TKR or due to  
416 other circumstances.

417  
418 **Knee joint active range of motion** will be measured with a 360° plastic goniometer (scale 1°) with  
419 16.5 cm moveable arms at baseline in the week of surgery, three months, and 12 months after  
420 surgery. Laying supine on an examination table, the knee joint flexion and knee joint extension will  
421 be measured separately (70). The tester then identifies the most prominent part of the trochanter, the  
422 lateral epicondyle of the femur, the lateral head of fibula, and the lateral malleolus. When identified,  
423 the patient is asked to flex the knee as much as possible with the heel maintaining contact to the  
424 surface at all time (70). Secondly, the patients will be asked to extend the knee joint as much as

1  
2  
3  
4 425 possible. To allow the knee to extend as much as possible, a firm quadratic box (height: 5 cm,  
5  
6 426 width: 8 cm, length: 15 cm) will be placed under the heel of the patient. The procedure of  
7  
8  
9 427 measuring knee extension will be similar to knee flexion, as the patients increases the degree of  
10  
11 428 knee extension maximally (70) The fulcrum of the goniometer will correspond visually to the trans-  
12  
13 429 epicondylar axis of the knee joint. The moveable arms of the goniometer will be pointed towards  
14  
15  
16 430 the greater trochanter and the lateral malleolus (70).  
17

### 18 431 19 20 432 **Data management**

21  
22  
23 433 All data from the physical function tests will be entered into RedCap by the assessors using double  
24  
25 434 data entry to ensure data quality. All patient-reported outcome data (KOOS, NRS Pain, EQ-5D-5L)  
26  
27 435 will be entered directly into RedCap by the patients, and usage of the “required fields” will ensure  
28  
29  
30 436 no missing items from the completed questionnaires. To reduce missing data, a reminder email will  
31  
32 437 be sent automatically from the RedCap-system. All patient data will be anonymized by assigning  
33  
34 438 study numbers to each patient (coding). Personal data about the patient will be located separately  
35  
36  
37 439 from the main dataset to protect confidentiality during all trial phases.

38  
39 440 The raw dataset will be maintained for ten years after completion of the trial with indefinite  
40  
41 441 restricted access due to sensitive data. After publication of the trial, a fully anonymized patient-level  
42  
43 442 dataset and corresponding statistical description will be made publicly available if required by the  
44  
45  
46 443 scientific journal, in which the results are published.  
47

### 48 444 49 50 445 51 52 446 **Sample size**

53  
54  
55 447 The power and sample size calculation is based on the expected differences between the two subject  
56  
57 448 groups from baseline to three-month follow-up (8). Due to lack of data on the primary outcome for  
58  
59  
60



1  
2  
3  
4  
5  
6  
7  
8  
9  
10  
11  
12  
13  
14  
15  
16  
17  
18  
19  
20  
21  
22  
23  
24  
25  
26  
27  
28  
29  
30  
31  
32  
33  
34  
35  
36  
37  
38  
39  
40  
41  
42  
43  
44  
45  
46  
47  
48  
49  
50  
51  
52  
53  
54  
55  
56  
57  
58  
59  
60

investigations applying LL-BFRE before a surgical procedure, we decided to base our sample size calculation on Skoffler et al. (8) who investigated the efficacy of four weeks of preoperative and four weeks postoperative HRST (intervention group) compared to four weeks of postoperative HRST only (control group) on 30-s CST three months in patients receiving a TKR (8). The authors found a between-group difference of 3-4 repetition difference ( $14.7 \pm 4.7$  repetitions versus  $11.0 \pm 4.4$  repetitions) three months after TKR surgery (8).

To reduce the probability of type I errors and enable detection of a between-group difference also,  $\alpha$ -level is set at 0.05 ( $p < 0.05$ ) and  $\beta$ -level is set at 0.20 (80% power). Expecting a 3-repetition between-group difference three months postoperatively and assuming a SD of 4.7 in both groups, 39 patients are required in each group (yielding 78 patients in total). With an anticipated dropout rate of 10%, 84 patients will be recruited for the trial.

### Statistical considerations

The primary efficacy analysis will be an assessment of the between group difference in change in the 30-S CST from baseline to three-month follow-up (primary endpoint).

All descriptive statistics and tests will be reported in accordance with the recommendations of the “Enhancing the QUALity and Transparency Of health Research” (EQUATOR) network (71) and the CONSORT statement (47). Intention-to-treat principle (i.e. all patients as randomized independent of departures from allocation treatment, compliance and/or withdrawals) and per protocol analysis will be conducted. A one-way analysis of variance (one-way ANOVA) model will be used to analyze between group mean changes in continuous outcome measures (31). The model includes changes from baseline to 12-month follow-up. Between-intervention comparison from baseline to three months after surgery will be analyzed using a mixed linear model with patient ID as a random effect and time, group and hospital as fixed effects (31, 72). Also, to gain insight into

1  
2  
3  
4 473 the potential pre-to-post training differences within the respective training or control groups, paired  
5  
6  
7 474 student t-tests will be performed. Level of statistical significance is  $P < 0.05$ . *Secondary outcome*  
8  
9 475 *variables:* Between-intervention comparison from baseline to the week of surgery, six weeks after  
10  
11 476 surgery, three and 12 months after surgery will be analyzed as described for the primary outcome.  
12  
13  
14 477 Regression analysis will be used to analyze the potential associations between preoperative strength  
15  
16 478 and postoperative lower extremity function and self-reported outcome as well as between  
17  
18 479 preoperative functional capacity and postoperative functional capacity. Additionally, regression  
19  
20  
21 480 analysis will be used to analyze the association between preoperative number of satellite cells and  
22  
23 481 myonuclei on postoperative isometric knee extensor muscle strength, muscle fiber cross sectional  
24  
25 482 area, and functional capacity. All statistical analyses will be performed by the primary investigator  
26  
27 483 using Stata.  
28  
29  
30 484

### 31 32 485 **Ethical aspects and dissemination**

33  
34 486 The trial has been accepted by the Central Denmark Region Committee on Biomedical Research  
35  
36  
37 487 Ethics (Journal No 10-72-19-19) and by the Danish Data Protection Agency (Journal No 652164).  
38  
39 488 The trial is registered at Clinicaltrials.gov (NCT04081493). Before inclusion, all patients will  
40  
41 489 provide their written informed consent in accordance with the Helsinki Declaration. All data and  
42  
43  
44 490 information collected in regard to this trial will be treated confidentially (blinded and encrypted) by  
45  
46 491 the researchers and staff connected to the trial.  
47

48 492 All results from the trial will be published in international peer-reviewed scientific journals  
49  
50 493 regardless of the results being considered positive, negative or inconclusive.  
51  
52  
53 494

### 54 55 495 **Patient and public involvement**

56  
57 496 Before developing this clinical trial, a pilot project was performed to determine the feasibility and  
58  
59  
60

1  
2  
3  
4  
5  
6  
7  
8  
9  
10  
11  
12  
13  
14  
15  
16  
17  
18  
19  
20  
21  
22  
23  
24  
25  
26  
27  
28  
29  
30  
31  
32  
33  
34  
35  
36  
37  
38  
39  
40  
41  
42  
43  
44  
45  
46  
47  
48  
49  
50  
51  
52  
53  
54  
55  
56  
57  
58  
59  
60

497 efficacy of BFRE in patients suffering from lower limb injuries. The experiences with the training  
modality and the verbal feedback from patients on training duration, frequency, and intensity  
498 resulted in useful knowledge that certainly has improved the development of the present clinical  
499 trial.

## 502 **DISCUSSION**

503 To the best of our knowledge, this is the first trial to investigate the effect of preoperative BFRE on  
504 functional capacity, self-reported outcome, lower limb muscle strength and myofiber  
505 morphology/stem cell abundance in patients scheduled for TKR. Only few studies have investigated  
506 (short term (10 days)) preoperative BFRE without finding an atrophy protective effect or difference  
507 in muscle strength compared to a control group performing a placebo intervention (SHAM group)  
508 (73). However, patients performing short term preoperative BFRE before ACL-R demonstrated  
509 higher muscle endurance compared to a SHAM group (74). Therefore, results of this trial are  
510 expected to provide novel information on longer periods of BFRE that will enable researchers to  
511 design effective exercise-based preconditioning protocols for elective TKR patients. The LL-BFRE  
512 protocol applied in the present project is widely used and follows the recommendations from a  
513 recent position stand by Patterson et al. (75). The authors suggested that exercising 2-3 times per  
514 week at 20-40% of 1RM in 2-4 sets (e.g. 30-15-15-15 or sets to failure) using pressures between 40  
515 to 80% of LOP has demonstrated to be effective when aiming at increasing muscle strength and  
516 promoting muscle hypertrophy (75).

517 The trial is designed as an assessor blinded randomized controlled trial, thus representing the  
518 highest evidence level. However, the nature of the trial does not allow blinding of the participants  
519 which is an inherent limitation of the trial. The trial is conducted at two hospitals that consistently  
520 perform a high number of TKR procedures annually (225 and 460, respectively), thus securing a

1  
2  
3  
4  
5  
6  
7  
8  
9  
10  
11  
12  
13  
14  
15  
16  
17  
18  
19  
20  
21  
22  
23  
24  
25  
26  
27  
28  
29  
30  
31  
32  
33  
34  
35  
36  
37  
38  
39  
40  
41  
42  
43  
44  
45  
46  
47  
48  
49  
50  
51  
52  
53  
54  
55  
56  
57  
58  
59  
60

521 strong expertise in terms of surgery and infrastructure. Both hospitals have all equipment needed  
522 available for surgery, post-operative hospitalization, training, and testing. All outcome variables are  
523 considered valid and reliable measures and consist of both objective outcomes and self-reported  
524 patient outcomes.

525 No adverse health-related events have been reported in previous studies applying BFRE in  
526 patients' suffering from knee OA or in healthy older adults (1, 9, 13, 23, 33, 34). Further, in a recent  
527 review and meta-analysis it was stated that exercise with concurrent blood-flow restriction is a safe  
528 exercise modality when occlusion procedures are applied correctly (13). The inherent invasive  
529 procedure of muscle biopsies may cause adverse events in rare occasions. Therefore, all muscle  
530 biopsy samples will be collected by trained medical doctors and performed following administration  
531 of local anesthesia and in fully sterile conditions. The needle muscle biopsy protocol has been  
532 applied in a large number of previous investigations including very old frail subjects (97 years of  
533 age) without any reporting of adverse events besides occasional muscle soreness(31, 49, 58, 76, 77).

534 There are some limitations of the project that must be taken into account. First, our primary end  
535 point is three months postoperatively. The (uncontrolled) period discharge to three months  
536 postoperatively renders the project vulnerable to external variabilities. However, from a pragmatic  
537 point of view, this uncontrolled period from discharge to three-month follow-up reflects the reality  
538 that Danish patients face postoperatively. Thus, the results at three-month follow-up will, indeed,  
539 reflect the impact of performing preoperative LL-BFRE on the postoperative outcome regardless of  
540 the external variable that can hamper the results. Secondly, the discharge criteria at Horsens  
541 Regional Hospital and Silkeborg Regional Hospital withhold slight differences. That is, the  
542 acceptable knee joint ROM at discharge differs between the sites, thus it can be speculated that  
543 more patients from Silkeborg Regional Hospital will be offered a postoperative, supervised  
544 rehabilitation program. This might affect the number of patients receiving supervised physiotherapy

1  
2  
3  
4 545 after discharge between sites. However, all patients included in the present project will report  
5  
6 546 whether they have received postoperative supervised physiotherapy at all follow-up assessments.  
7  
8  
9 547 Thus, we will be able to determine (and normalize) a potential between-site difference in patients  
10  
11 548 receiving supervised physiotherapy after TKR. Also, site-specific differences in the postoperative  
12  
13 549 rehabilitation protocols (Tables 1a and 1b) may be considered a limitation. That is, the protocols  
14  
15  
16 550 contain both identical but also different exercises and progression steps. However, a recent review  
17  
18 551 and meta-analysis found no difference in effectiveness between clinic-based or inpatient programs  
19  
20 552 compared with home-based rehabilitation programs in the early subacute period after TKA (27) and  
21  
22  
23 553 studies in other knee patient populations have also been unable to observe differences in main  
24  
25 554 outcome variables when comparing home-based postoperative rehabilitation to supervised  
26  
27 555 postoperative rehabilitation (28, 29). We feel confident therefore that the apparent differences  
28  
29  
30 556 between the postoperative rehabilitation protocols are not highly likely to affect the results of the  
31  
32 557 present study. Nonetheless, to verify this notion we will introduce site allocation (Horsens Hospital  
33  
34 558 vs. Silkeborg Hospital) as a separate independent variable in the mixed linear model used for the  
35  
36 559 statistical analysis.  
37  
38  
39 560  
40  
41 561  
42

### 43 562 **Author contributions**

44  
45 563 SLJ, PAA, MBB, and IM were all part of designing the trial and approved the final version of the  
46  
47  
48 564 protocol. Also, SLJ, PAA, MBB, and IM wrote and revised the protocol.  
49

### 50 565 51 52 566 **Data statement**

53  
54  
55 567 All obtained data will be stored in anonymized form at the Danish National Archives and deleted  
56  
57 568 after 10 years.  
58  
59  
60

1  
2  
3  
4 569  
5  
6  
7 570  
8  
9 571  
10  
11 572  
12  
13  
14 573  
15  
16 574  
17  
18 575  
19  
20 576  
21  
22  
23 577  
24  
25 578  
26  
27 579  
28  
29  
30 580  
31  
32 581  
33  
34 582  
35  
36 583  
37  
38  
39 584  
40  
41 585  
42  
43  
44  
45  
46  
47  
48  
49  
50  
51  
52  
53  
54  
55  
56  
57  
58  
59  
60

### **Funding**

This work trial is supported by Aase og Ejnar Danielsen's Foundation (100,000 dkk), Nis-Hanssen's Mindeslegat (163,883 dkk) and the Health Research Foundation of Central Denmark Region (99,658 dkk), Hede-Nielsen Foundation (8,000 dkk).

### **Competing interest**

None to be declared

### **Ethics approval**

The trial has been accepted by the Central Denmark Region Committee on Biomedical Research Ethics (Journal No 10-72-19-19) and by the Danish Data Protection Agency (Reference No 652164).

### **Word count**

5.770 words

1  
2  
3  
4  
5  
6  
7  
8  
9  
10  
11  
12  
13  
14  
15  
16  
17  
18  
19  
20  
21  
22  
23  
24  
25  
26  
27  
28  
29  
30  
31  
32  
33  
34  
35  
36  
37  
38  
39  
40  
41  
42  
43  
44  
45  
46  
47  
48  
49  
50  
51  
52  
53  
54  
55  
56  
57  
58  
59  
60**REFERENCES**

1. Ferraz RB, Gualano B, Rodrigues R, Kurimori CO, Fuller R, Lima FR, et al. Benefits of Resistance Training with Blood Flow Restriction in Knee Osteoarthritis. *Medicine and science in sports and exercise*. 2018.
2. Bade MJ, Kohrt WM, Stevens-Lapsley J. Outcomes before and after total knee arthroplasty compared to healthy adults. *The Journal of orthopaedic and sports physical therapy*. 2010.
3. Fransen M, McConnell S, Harmer AR, Van dE, Simic M, Bennell KL. Exercise for osteoarthritis of the knee. 2015.
4. Skoffler B, Dalgas U, Mechlenburg I. Progressive resistance training before and after total hip and knee arthroplasty: A systematic review. 2015.
5. Sundhedsstyrelsen. Knæartrose - nationale kliniske retningslinjer og faglige visitationsretningslinjer2012.
6. Franz A, Queitsch FP, Behringer M, Mayer C, Krauspe R, Zilkens C. Blood flow restriction training as a prehabilitation concept in total knee arthroplasty: A narrative review about current preoperative interventions and the potential impact of BFR. *Medical hypotheses*. 2018.
7. Calatayud J, Casaña J, Ezzatvar Y, Jakobsen MD, Sundstrup E, Andersen LL. High-intensity preoperative training improves physical and functional recovery in the early post-operative periods after total knee arthroplasty: a randomized controlled trial. *Knee surgery, sports traumatology, arthroscopy : official journal of the ESSKA*. 2016.
8. Skoffler B, Maribo T, Mechlenburg I, Hansen PM, Søballe K, Dalgas U. Efficacy of Preoperative Progressive Resistance Training on Postoperative Outcomes in Patients Undergoing Total Knee Arthroplasty. *Arthritis Care & Research*. 2016.
9. Bryk FF, dos Reis AC, Fingerhut D, Araujo T, Schutzer M, Cury RdPL, et al. Exercises with partial vascular occlusion in patients with knee osteoarthritis: a randomized clinical trial. *Knee Surgery, Sports Traumatology, Arthroscopy*. 2016;24(5):1580-6.
10. Wang L, Lee M, Zhang Z, Moodie J, Cheng D, Martin J. Does preoperative rehabilitation for patients planning to undergo joint replacement surgery improve outcomes? A systematic review and meta-analysis of randomised controlled trials. *BMJ open*. 2016;6(2):e009857-2015-.
11. Chesham RA, Shanmugam S. Does preoperative physiotherapy improve postoperative, patient-based outcomes in older adults who have undergone total knee arthroplasty? A systematic review. 2017.
12. Kwok IH, Paton B, Haddad FS. Does Pre-Operative Physiotherapy Improve Outcomes in Primary Total Knee Arthroplasty? - A Systematic Review. *The Journal of arthroplasty*. 2015;30(9):1657-63.
13. Hughes L, Paton B, Rosenblatt B, Gissane C, Patterson SD. Blood flow restriction training in clinical musculoskeletal rehabilitation: A systematic review and meta-analysis. 2017.
14. Counts BRDSJBBEKDGMJAKMTRSATBMGLJP. Influence of Relative Blood Flow Restriction Pressure on Muscle Activation and Muscle Adaptation. *Muscle & nerve*. 2016;53:438-45.
15. Kim D, Loenneke JP, Ye X, Bembem DA, Beck TW, Larson RD, et al. Low-load resistance training with low relative pressure produces muscular changes similar to high-load resistance training. *Muscle & nerve*. 2017;56(6):E126-E33.
16. Loenneke JP, Fahs CA, Rossow LM, Sherk VD, Thiebaud RS, Abe T, et al. Effects of cuff width on arterial occlusion: implications for blood flow restricted exercise. *European journal of applied physiology*. 2012;112(8):2903-12.
17. Loenneke JP, Kim D, Fahs CA, Thiebaud RS, Abe T, Larson RD, et al. The influence of exercise load with and without different levels of blood flow restriction on acute changes in muscle thickness and lactate. *Clinical Physiology and Functional Imaging*. 2017.

- 1  
2  
3  
4 639 18. Loenneke JP, Kim D, Fahs CA, Thiebaud RS, Abe T, Larson RD, et al. Effects of  
5 640 exercise with and without different degrees of blood flow restriction on torque and muscle  
6 641 activation. *Muscle & nerve*. 2015.  
7 642 19. Loenneke JP, Thrower AD, Balapur A, Barnes JT, Pujol TJ. Blood flow-restricted  
8 643 walking does not result in an accumulation of metabolites. *Clinical physiology and functional*  
9 644 *imaging*. 2012;32(1):80-2.  
10 645 20. Loenneke JP, Wilson JM, Balapur A, Thrower AD, Barnes JT, Pujol TJ. Time under  
11 646 tension decreased with blood flow-restricted exercise. *Clinical physiology and functional*  
12 647 *imaging*. 2012;32(4):268-73.  
13 648 21. Loenneke JP, Wilson JM, Wilson GJ, Pujol TJ, Bembem MG. Potential safety issues  
14 649 with blood flow restriction training. 2011. p. 510-8.  
15 650 22. Loenneke JP, Young KC, Fahs CA, Rossow LM, Bembem DA, Bembem MG. Blood  
16 651 flow restriction: rationale for improving bone. *Medical hypotheses*. 2012;78(4):523-7.  
17 652 23. Ozaki H, Loenneke JP, Abe T. Blood flow-restricted walking in older women: does  
18 653 the acute hormonal response associate with muscle hypertrophy? *Clinical physiology and*  
19 654 *functional imaging*. 2017;37(4):379-83.  
20 655 24. Ozaki H, Loenneke JP, Thiebaud RS, Stager JM, Abe T. Possibility of leg muscle  
21 656 hypertrophy by ambulation in older adults: a brief review. *Clinical interventions in aging*.  
22 657 2013;8:369-75.  
23 658 25. Scott BR, Loenneke JP, Slattery KM, Dascombe BJ. Blood flow restricted exercise  
24 659 for athletes: A review of available evidence. *Journal of science and medicine in sport*.  
25 660 2016;19(5):360-7.  
26 661 26. Scott BR, Loenneke JP, Slattery KM, Dascombe BJ. Exercise with blood flow  
27 662 restriction: an updated evidence-based approach for enhanced muscular development. *Sports*  
28 663 *medicine (Auckland, NZ)*. 2015;45(3):313-25.  
29 664 27. Takarada Y, Nakamura Y, Aruga S, Onda T, Miyazaki S, Ishii N. Rapid increase in  
30 665 plasma growth hormone after low-intensity resistance exercise with vascular occlusion. *Journal*  
31 666 *of applied physiology (Bethesda, Md: 1985)*. 2000;88(1):61-5.  
32 667 28. Takarada Y, Sato Y, Ishii N. Effects of resistance exercise combined with vascular  
33 668 occlusion on muscle function in athletes. *European journal of applied physiology*. 2002;86:308-  
34 669 14.  
35 670 29. Takarada Y, Takazawa H, Ishii N. Applications of vascular occlusion diminish  
36 671 disuse atrophy of knee extensor muscles. *Medicine and science in sports and exercise*.  
37 672 2000;32(12):2035-9.  
38 673 30. Jørgensen AN, Aagaard P, Nielsen JL, Frandsen U, Diederichsen LP. Effects of  
39 674 blood-flow-restricted resistance training on muscle function in a 74-year-old male with  
40 675 sporadic inclusion body myositis: a case report. *Clinical Physiology and Functional Imaging*.  
41 676 2016;36(6):504-9.  
42 677 31. Nielsen JL, Aagaard P, Bech RD, Nygaard T, Hvid LG, Wernbom M, et al.  
43 678 Proliferation of myogenic stem cells in human skeletal muscle in response to low-load  
44 679 resistance training with blood flow restriction. *The Journal of physiology*. 2012;590(17):4351-  
45 680 61.  
46 681 32. Nielsen JL, Aagaard P, Prokhorova TA, Nygaard T, Bech RD, Suetta C, et al.  
47 682 Blood-flow restricted training leads to myocellular macrophage infiltration and upregulation of  
48 683 heat-shock proteins, but no apparent muscle damage. *The Journal of physiology*.  
49 684 2017;14:4857-73.  
50 685 33. Segal N, Davis MD, Mikesky AE. Efficacy of Blood Flow-Restricted Low-Load  
51 686 Resistance Training For Quadriceps Strengthening in Men at Risk of Symptomatic Knee  
52 687 Osteoarthritis. *Geriatric orthopaedic surgery & rehabilitation*. 2015;6(3):160-7.  
53 688 34. Segal NA, Williams GN, Davis MC, Wallace RB, Mikesky AE. Efficacy of blood flow-  
54 689 restricted, low-load resistance training in women with risk factors for symptomatic knee  
55 690 osteoarthritis. *PM & R : the journal of injury, function, and rehabilitation*. 2015;7(4):376-84.  
56 691 35. Jessee MB, Mattocks KT, Buckner SL, Dankel SJ, Mouser JG, Abe T, et al.  
57 692 Mechanisms of Blood Flow Restriction: The New Testament. *Techniques in Orthopaedics*.  
58 693 2018;33(2):72-9.  
59  
60



1

2

3

4 694

36. Mattocks KT, Jessee MB, Mouser JG, Dankel SJ, Buckner SL, Bell ZW, et al. The Application of Blood Flow Restriction: Lessons From the Laboratory. *Current sports medicine reports*. 2018;17(4):129-34.

6 696

37. Wernbom M, Augustsson J, Raastad T. Ischemic strength training: a low-load alternative to heavy resistance exercise? *Scandinavian Journal of Medicine & Science in Sports*. 2008;18(4):401-16.

9 699

38. Wernbom M, Aagaard P. Muscle fibre activation and fatigue with low-load blood flow restricted resistance exercise-An integrative physiology review. *Acta physiologica (Oxford, England)*. 2019:e13302.

12 702

39. Mauro A. Satellite cell of skeletal muscle fibers. *The Journal of biophysical and biochemical cytology*. 1961.

14 704

40. Kadi F, Charifi N, Denis C, Lexell J. Satellite cells and myonuclei in young and elderly women and men. *Muscle and Nerve*. 2004.

16 706

41. Olsen S, Aagaard P, Kadi F, Tufekovic G, Verney J, Olesen JL, et al. Creatine supplementation augments the increase in satellite cell and myonuclei number in human skeletal muscle induced by strength training. *Journal of Physiology*. 2006.

18 708

42. Francaux M, Deldicque L. Exercise and the control of muscle mass in human. *Pflügers Archiv - European Journal of Physiology*. 2018.

20 710

43. Kadi F, Schjerling P, Andersen LL, Charifi N, Madsen J, Christensen LR, et al. The effects of heavy resistance training and detraining on satellite cells in human skeletal muscles. *The Journal of physiology*. 2004.

23 713

44. Bazgir B, Fathi R, Valojerdi MR, Mozdziak P, Asgari A. Satellite cells contribution to exercise mediated muscle hypertrophy and repair. 2016.

26 715

45. Covinsky KE, Lindquist K, Dunlop DD, Gill TM, Yelin E. Effect of arthritis in middle age on older-age functioning. *Journal of the American Geriatrics Society*. 2008;56(1):23-8.

28 717

46. Bruusgaard JC, Johansen IB, Egner IM, Rana ZA, Gundersen K. Myonuclei acquired by overload exercise precede hypertrophy and are not lost on detraining. *Proceedings of the National Academy of Sciences*. 2010.

31 720

47. Moher D, Hopewell S, Schulz KF, Montori V, Gotzsche PC, Devereaux PJ, et al. CONSORT 2010 explanation and elaboration: updated guidelines for reporting parallel group randomised trials. *International journal of surgery (London, England)*. 2012;10(1):28-55.

34 723

48. M B. Knæalloplastik - fysioterapeutisk instruks <https://e-dok.rm.dk/edok/admin/GUI.nsf/Desktop.html?Open&login>: e-dok; 2019 [updated 03.04.19. 4:[1].

37 726

49. Suetta C, Andersen JL, Dalgas U, Berget J, Koskinen S, Aagaard P, et al. Resistance training induces qualitative changes in muscle morphology, muscle architecture, and muscle function in elderly postoperative patients. *Journal of applied physiology (Bethesda, Md: 1985)*. 2008;105(1):180-6.

40 729

50. Gill S, McBurney H. Reliability of performance-based measures in people awaiting joint replacement surgery of the hip or knee. *Physiotherapy Research International : The Journal for Researchers and Clinicians in Physical Therapy*. 2008;13(3):141-52.

43 732

51. Jones CJ, Rikli RE, Beam WC. A 30-s chair-stand test as a measure of lower body strength in community-residing older adults. *Research quarterly for exercise and sport*. 1999;70(2):113-9.

46 735

52. Wright AA, Cook CE, Baxter GD, Dockerty JD, Abbott JH. A comparison of 3 methodological approaches to defining major clinically important improvement of 4 performance measures in patients with hip osteoarthritis. *The Journal of orthopaedic and sports physical therapy*. 2011;41(5):319-27.

49 738

53. Bloch ML, Jonsson LR, Kristensen MT. Introducing a Third Timed Up & Go Test Trial Improves Performances of Hospitalized and Community-Dwelling Older Individuals. *Journal of geriatric physical therapy (2001)*. 2017;40(3):121-6.

52 741

54. Kristensen MT, Ekdahl C, Kehlet H, Bandholm T. How many trials are needed to achieve performance stability of the Timed Up & Go test in patients with hip fracture? *Archives of Physical Medicine and Rehabilitation*. 2010;91(6):885-9.

55 744

57 746

58 747

59

60

1  
2  
3  
4  
5  
6  
7  
8  
9  
10  
11  
12  
13  
14  
15  
16  
17  
18  
19  
20  
21  
22  
23  
24  
25  
26  
27  
28  
29  
30  
31  
32  
33  
34  
35  
36  
37  
38  
39  
40  
41  
42  
43  
44  
45  
46  
47  
48  
49  
50  
51  
52  
53  
54  
55  
56  
57  
58  
59  
60

55. Hansen H. RM-testmanal. Danish Physiotherapy Society: Danish Physiotherapy Society; 2012. p. 2.

56. Koblbauer IFH, Lambrecht Y, Van DH, Neeter C, Engelbert RHH, Poolman RW, et al. Reliability of maximal isometric knee strength testing with modified hand-held dynamometry in patients awaiting total knee arthroplasty: Useful in research and individual patient settings? A reliability study. *BMC Musculoskeletal Disorders*. 2011.

57. C N, V.A.B S, Y L, I K, M VDH, R.H.H E, et al. Reliability of hand-held dynamometry in patients awaiting total knee arthroplasty. *Physiotherapy (United Kingdom)*. 2011.

58. Ekblom B. The muscle biopsy technique. Historical and methodological considerations. *Scandinavian Journal of Medicine & Science in Sports*. 2017;27(5):458-61.

59. Bergstrom J. Muscle electrolytes in man determined by neutron activation analysis on needle biopsy specimens. *Scandinavian Journal of Clinical and Laboratory Investigation (England)*. 1962;14(Suppl 68).

60. Aagaard P, Andersen JL, Dyhre-Poulsen P, Leffers AM, Wagner A, Peter Magnusson S, et al. A mechanism for increased contractile strength of human pennate muscle in response to strength training: Changes in muscle architecture. *Journal of Physiology*. 2001;534(2):613-23.

61. Roos EM, Lohmander LS. The Knee injury and Osteoarthritis Outcome Score (KOOS): From joint injury to osteoarthritis. 2003.

62. Nilsson AK, Lohmander LS, Klassbo M, Roos EM. Hip disability and osteoarthritis outcome score (HOOS)--validity and responsiveness in total hip replacement. *BMC musculoskeletal disorders*. 2003;4:10-2474-4-10. Epub 003 May 30.

63. Lyman S, Lee YY, McLawhorn AS, Islam W, MacLean CH. What Are the Minimal and Substantial Improvements in the HOOS and KOOS and JR Versions After Total Joint Replacement? *Clinical orthopaedics and related research*. 2018;476(12):2432-41.

64. Collins NJ, Prinsen CA, Christensen R, Bartels EM, Terwee CB, Roos EM. Knee Injury and Osteoarthritis Outcome Score (KOOS): systematic review and meta-analysis of measurement properties. *Osteoarthritis and cartilage*. 2016;24(8):1317-29.

65. Herdman M, Gudex C, Lloyd A, Janssen M, Kind P, Parkin D, et al. Development and preliminary testing of the new five-level version of EQ-5D (EQ-5D-5L). *Quality of life research : an international journal of quality of life aspects of treatment, care and rehabilitation*. 2011;20(10):1727-36.

66. Wittrup-Jensen KU, Lauridsen J, Gudex C, Pedersen KM. Generation of a Danish TTO value set for EQ-5D health states. *Scandinavian Journal of Public Health*. 2009;37(5):459-66.

67. Bilbao A, Garcia-Perez L, Arenaza JC, Garcia I, Ariza-Cardiel G, Trujillo-Martin E, et al. Psychometric properties of the EQ-5D-5L in patients with hip or knee osteoarthritis: reliability, validity and responsiveness. *Quality of life research : an international journal of quality of life aspects of treatment, care and rehabilitation*. 2018;27(11):2897-908.

68. Buchholz I, Janssen MF, Kohlmann T, Feng YS. A Systematic Review of Studies Comparing the Measurement Properties of the Three-Level and Five-Level Versions of the EQ-5D. *PharmacoEconomics*. 2018;36(6):645-61.

69. Hawker GA, Mian S, Kendzerska T, French M. Measures of adult pain: Visual Analog Scale for Pain (VAS Pain), Numeric Rating Scale for Pain (NRS Pain), McGill Pain Questionnaire (MPQ), Short-Form McGill Pain Questionnaire (SF-MPQ), Chronic Pain Grade Scale (CPGS), Short Form-36 Bodily Pain Scale (SF-36 BPS), and Measure of Intermittent and Constant Osteoarthritis Pain (ICOAP). *Arthritis care & research*. 2011;63 Suppl 11:S240-52.

70. Jakobsen TL, Christensen M, Christensen SS, Olsen M, Bandholm T. Reliability of knee joint range of motion and circumference measurements after total knee arthroplasty: does tester experience matter? *Physiotherapy Research International*. 2010;15(3):126-34.

71. Christensen R, Bliddal H, Henriksen M. Enhancing the reporting and transparency of rheumatology research: a guide to reporting guidelines. *Arthritis research & therapy*. 2013;15(1):109.

1  
2  
3  
4  
5  
6  
7  
8  
9  
10  
11  
12  
13  
14  
15  
16  
17  
18  
19  
20  
21  
22  
23  
24  
25  
26  
27  
28  
29  
30  
31  
32  
33  
34  
35  
36  
37  
38  
39  
40  
41  
42  
43  
44  
45  
46  
47  
48  
49  
50  
51  
52  
53  
54  
55  
56  
57  
58  
59  
60

72. Malcata RM, Hopkins WG, Pearson SN. Tracking career performance of successful triathletes. *Medicine and science in sports and exercise*. 2014;46(6):1227-34.

73. Grapar Zargi T, Drobnic M, Jkoder J, Strazar K, Kacin A. The effects of preconditioning with ischemic exercise on quadriceps femoris muscle atrophy following anterior cruciate ligament reconstruction: a quasi-randomized controlled trial. *European journal of physical and rehabilitation medicine*. 2016;52(3):310-20.

74. Zargi T, Drobnic M, Strazar K, Kacin A. Short-Term Preconditioning With Blood Flow Restricted Exercise Preserves Quadriceps Muscle Endurance in Patients After Anterior Cruciate Ligament Reconstruction. *Frontiers in physiology*. 2018;9:1150.

75. Patterson SD, Hughes L, Warmington S, Burr J, Scott BR, Owens J, et al. Blood Flow Restriction Exercise Position Stand: Considerations of Methodology, Application, and Safety. *Frontiers in physiology*. 2019;10:533.

76. Andersen J, Aagaard P. Myosin heavy chain IIX overshoot in human skeletal muscle. *Muscle & nerve*. 2000;23:1095-104.

77. Malm C, Nyberg P, Engstrom M, Sjodin B, Lenkei R, Ekblom B, et al. Immunological changes in human skeletal muscle and blood after eccentric exercise and multiple biopsies. *The Journal of physiology*. 2000;529 Pt 1:243-62.

peer review only

821 *Table 1a.* Postoperative rehabilitation program, Horsens Regional Hospital

| Week 0-3           |                                                                                               |                          |                 |                                                                                                   |
|--------------------|-----------------------------------------------------------------------------------------------|--------------------------|-----------------|---------------------------------------------------------------------------------------------------|
| Step               | Exercise                                                                                      | Repetitions              | Sets            | Resistance                                                                                        |
| Step 1 & 2         | Supine peristaltic pump exercise with feet above heart level                                  | 20 minutes               | 3-4/day         | -                                                                                                 |
| Step 1             | Supine knee extension mobilization                                                            | 20 seconds               | 3 sets          | -                                                                                                 |
| Step 1             | Supine unilateral knee and hip extension and flexion mobilization with slipper under the heel | 5 repetitions            | 3 sets          | Slipper minimizes floor friction                                                                  |
| Step 2             | Seated knee extension and flexion mobilization with slipper under the foot                    | 5 repetitions            | 3 sets          | Slipper minimizes floor friction                                                                  |
| Step 2             | Standing weight transfer exercise                                                             | 15 repetitions each side | 1 set           | Bodyweight                                                                                        |
| Step 2             | Sit to stand from a high chair or the edge of table                                           | 5 repetitions            | 3 sets          | Bodyweight                                                                                        |
| Week 3 and onwards |                                                                                               |                          |                 |                                                                                                   |
| Step 1 & 2         | Supine peristaltic pump exercise with feet above heart level                                  | 20 minutes               | 3-4/day         | -                                                                                                 |
| Step 1             | Seated knee extension mobilization                                                            | 20 seconds               | 4 rounds        | Arms can be used to apply pressure onto the knee to help extend the knee                          |
| Step 1             | Step up exercise                                                                              | 10-15 repetitions        | 2-3 sets        | Bodyweight                                                                                        |
| Step 1             | Standing knee isometric knee towel press                                                      | 10-15 repetitions        | 2-3 sets        | Ball/Towel rolled together                                                                        |
| Step 1             | Sit to stand from a chair                                                                     | 10-15 repetitions        | 2-3 sets        | Bodyweight                                                                                        |
| Step 1             | One leg standing                                                                              | 30 seconds               | 1 set           | Bodyweight                                                                                        |
| Step 2             | Standing hip flexion                                                                          | Not informed             | Not informed    | Elastic band                                                                                      |
| Step 2             | Standing hip abduction                                                                        | Not informed             | Not informed    | Elastic band                                                                                      |
| Step 2             | Partial frontal plane sliding lunge                                                           | 10 repetitions           | 3 sets, 2-3/day | Bodyweight                                                                                        |
| Step 2             | Partial back sliding lunge                                                                    | 10 repetitions           | 3 sets, 2-3/day | Bodyweight                                                                                        |
| Optional           | Cycling                                                                                       | 10-20 minutes            | 1 set           | Light resistance can be added when it is possible to perform a full round with the operated limb. |

Step 1 is performed in the morning and step 2 is performed in the afternoon. All exercises are performed once per day.

824 *Table 1b.* Postoperative rehabilitation program, Silkeborg Regional Hospital

| Week 0-2           |                                            |               |              |                                                 |
|--------------------|--------------------------------------------|---------------|--------------|-------------------------------------------------|
| Step               | Exercise                                   | Repetitions   | Sets         | Resistance                                      |
| Optional           | Cycling                                    | 5-10 minutes  | 2/day        | -                                               |
| -                  | Supine peristaltic pump exercise           | Not informed  | Not informed | -                                               |
| -                  | Rest with leg above heart level            | 30 minutes    | 4/day        | -                                               |
| -                  | Seated isometric knee extension            | 3 seconds     | 10 sets      | Lower leg and the foot                          |
| -                  | Seated knee flexion mobilization           | 3 seconds     | 10 sets      | -                                               |
| -                  | Seated knee extension mobilization         | 30 seconds    | 3 sets       | Apply pressure to the knee joint using the arms |
| -                  | Supine isometric knee extension            | 3 seconds     | 10 sets      | Lower leg and the foot                          |
| -                  | Supine passive knee extension mobilization |               |              | Gravity will extend the knee joint              |
| Week 2 and onwards |                                            |               |              |                                                 |
| -                  | Supine knee isometric knee towel press     | 3seconds hold | 10sets       | Lower leg and the foot                          |

|   |     |                                            |                |         |             |
|---|-----|--------------------------------------------|----------------|---------|-------------|
| 1 |     |                                            |                |         |             |
| 2 |     |                                            |                |         |             |
| 3 |     |                                            |                |         |             |
| 4 | -   | Sit to stand                               | 10 repetitions | 1 set   | Body weight |
| 5 | -   | Standing knee flexion mobilization         | 3 seconds      | 10 sets | Body weight |
| 6 | -   | Step Up Exercise                           | 10 repetitions | 1 set   | Body weight |
| 7 | 826 | All exercises are performed twice per day. |                |         |             |

8

9 827

10

11 828

12

13 829

14

15

16

17

18

19

20

21

22

23 830

24

25 831

26

27 832

28

29

30

31

32

33

34

35

36

37

38

39

40

41

42

43

44

45

46 833

47

48 834

49

50 835

51

52 836

53

54 837

55

56 838

57

58

59

60

*Table 2. Discharge criteria at Horsens Regional Hospital and Silkeborg Regional Hospital*

| Outcome                                                        | Horsens Regional Hospital | Silkeborg Regional Hospital |
|----------------------------------------------------------------|---------------------------|-----------------------------|
| Minimum knee flexion range of motion                           | 60 degrees                | 90 degrees                  |
| Maximal knee extension deficit                                 | 15 degrees                | 5 degrees                   |
| In-and-out of bed                                              | Independent               | Independent                 |
| Sit-to-stand                                                   | Independent               | Independent                 |
| Walking with/without assistive devices                         | Independent               | Independent                 |
| Stair negotiation with/without assistive devices               | Independent               | Independent                 |
| Activities of daily living                                     | Independent               | Independent                 |
| Understanding of the home-based postoperative exercise program | Sufficient                | Sufficient                  |

*Table 3. Exercise variables for the blood-flow restricted exercise (BFRE) protocol*

| Exercise variable                                 | Week 1-8                                                                                                 |
|---------------------------------------------------|----------------------------------------------------------------------------------------------------------|
| Level of LOP                                      | 60% LOP                                                                                                  |
| Sets                                              | 4                                                                                                        |
| Load intensity                                    | 30% 1RM                                                                                                  |
| Repetitions 1 <sup>st</sup> set                   | 30                                                                                                       |
| Repetitions 2 <sup>nd</sup> & 3 <sup>rd</sup> set | 15                                                                                                       |
| Repetitions 4 <sup>th</sup> set                   | To volitional failure                                                                                    |
| Contraction modes per repetition                  |                                                                                                          |
| Concentric                                        | 2 seconds                                                                                                |
| Isometric                                         | 0 seconds                                                                                                |
| Eccentric                                         | 2 seconds                                                                                                |
| Rest between repetitions                          | 0 seconds                                                                                                |
| Time under tension per repetition                 | 4 seconds                                                                                                |
| Range of movement                                 | maximum                                                                                                  |
| Rest between sets                                 | 30 seconds                                                                                               |
| Rest between sessions                             | ≥36 hours                                                                                                |
| Progression                                       | The minimal possible load (5 kilo) is added when patients perform >15 repetitions in 4 <sup>th</sup> set |

*Table 4. Outcome measures to be collected.*

| Outcome measures | Data collection instrument | Time-points of assessment |
|------------------|----------------------------|---------------------------|
|------------------|----------------------------|---------------------------|

|                                                         |                                   |                                |
|---------------------------------------------------------|-----------------------------------|--------------------------------|
| <b>Primary outcome</b>                                  |                                   |                                |
| <b>Sit-to-stand function</b>                            | 30 seconds chair stand test       | B, S, 3 and 12 months          |
| <b>Secondary outcomes</b>                               |                                   |                                |
| <b>Ambulatory capacity</b>                              | Timed Up & Go                     | B, S, 3 and 12 months          |
| <b>Gait speed</b>                                       | 4x10-meter walk test              | B, S, 3 and 12 months          |
| <b>1RM Leg press strength</b>                           | Leg press machine                 | B, S, 3, and 12 months         |
| <b>1RM Knee extension strength</b>                      | Knee extension machine            | B, S, 3, and 12 months         |
| <b>Isometric Knee extensor muscle strength</b>          | Handheld Dynamometer              | B, S, 3 and 12 months          |
| <b>Isometric Knee flexion muscle strength</b>           | Handheld Dynamometer              | B, S, 3 and 12 months          |
| <b>Myofiber morphology</b>                              | Muscle Biopsies                   | B, S, 3 months                 |
| <b>Myogenic stem cell content</b>                       | Muscle Biopsies                   | B, S, 3 months                 |
| <b>Pain</b>                                             | KOOS                              | B, S, 6 weeks, 3 and 12 months |
| <b>Symptoms</b>                                         | KOOS                              | B, S, 6 weeks, 3 and 12 months |
| <b>Activities of daily living</b>                       | KOOS                              | B, S, 6 weeks, 3 and 12 months |
| <b>Sports &amp; Recreation</b>                          | KOOS                              | B, S, 6 weeks, 3 and 12 months |
| <b>Quality of life</b>                                  | KOOS                              | B, S, 6 weeks, 3 and 12 months |
| <b>Socioeconomic costs</b>                              | EQ-5D                             | B, S, 6 weeks, 3 and 12 months |
| <b>Adverse Events</b>                                   | Questionnaire and medical records | 3 months                       |
| <b>Exercise compliance and progression</b>              | Physiotherapist records           | BFRE                           |
| <b>Pain during visits</b>                               | NRS for pain                      | B, BFRE, S, 3 and 12 months    |
| <b>Declining to be operated</b>                         | Questionnaire                     | 3 months                       |
| <b>Postoperative supervised physiotherapy</b>           | Questionnaire                     | 6 weeks, 3 and 12 months       |
| <b>Knee joint range of motion</b>                       | Goniometer                        | B, S, 3 and 12 months          |
| <b>Patient characteristics and related measurements</b> | Questionnaire                     | B                              |
| <b>Gender</b>                                           | Tape measure                      | B                              |
| <b>Age</b>                                              | Electronic body mass scale        | B                              |
| <b>Height</b>                                           | Questionnaire                     | B                              |
| <b>Body mass</b>                                        | Questionnaire                     | B                              |
| <b>Civil Status</b>                                     | Questionnaire                     | B                              |
| <b>Educational Level</b>                                | Questionnaire                     | B                              |
| <b>Employment Status</b>                                | Questionnaire                     | B                              |
| <b>Substance Use (alcohol, smoking)</b>                 | Questionnaire                     | B                              |
| <b>Duration of knee symptoms</b>                        | Questionnaire                     | B                              |
| <b>Pain medication during the last week</b>             | Questionnaire                     | B                              |
| <b>Co-morbidities</b>                                   | Questionnaire                     | B                              |

1  
2  
3  
4  
5  
6  
7  
8  
9  
10  
11  
12  
13  
14  
15  
16  
17  
18  
19  
20  
21  
22  
23  
24  
25  
26  
27  
28  
29  
30  
31  
32  
33  
34  
35  
36  
37  
38  
39  
40  
41  
42  
43  
44  
45  
46  
47  
48  
49  
50  
51  
52  
53  
54  
55  
56  
57  
58  
59  
60

## Table and figure legends

Table 1a. Step 1 is performed in the morning and step 2 is performed in the afternoon. All exercises are performed once per day.

Table 1b. All exercises are performed once per day. Cycling ergometer exercise is optional.

Table 3. LOP: Total limb occlusion pressure; RM: Repetition Maximum

Table 4. KOOS = Knee disability and Osteoarthritis Outcome Score; B = Baseline; S = 0-2 days before surgery; D = during surgery; 3 months = 3 months after TKR; 12 months = 12 after TKR; NRS = Numeric Ranking Scale of pain

Figure 1. Flow chart of the enrollment, treatment, and follow-up phases. TKR: Total Knee Replacement, BFRE: Low-load blood-flow restricted exercise

Figure 1. Patient flow







STANDARD PROTOCOL ITEMS: RECOMMENDATIONS FOR INTERVENTIONAL TRIALS

SPIRIT 2013 Checklist: Recommended items to address in a clinical trial protocol and related documents\*

| Section/item                                                    | Item No              | Description                                                                                                                                                                                                                                                                                                                                                                                                                                                                                                                                                                                                                                                                   |
|-----------------------------------------------------------------|----------------------|-------------------------------------------------------------------------------------------------------------------------------------------------------------------------------------------------------------------------------------------------------------------------------------------------------------------------------------------------------------------------------------------------------------------------------------------------------------------------------------------------------------------------------------------------------------------------------------------------------------------------------------------------------------------------------|
| <b>Administrative information</b>                               |                      |                                                                                                                                                                                                                                                                                                                                                                                                                                                                                                                                                                                                                                                                               |
| Title (p 1, I 1-3)                                              | 1                    | Descriptive title identifying the study design, population, interventions, and, if applicable, trial acronym                                                                                                                                                                                                                                                                                                                                                                                                                                                                                                                                                                  |
| Trial registration<br>A: p 2, I 56-57<br>B:                     | 2a<br>2b             | Trial identifier and registry name. If not yet registered, name of intended registry<br>All items from the World Health Organization Trial Registration Data Set                                                                                                                                                                                                                                                                                                                                                                                                                                                                                                              |
| Protocol version<br>P 1, I 22                                   | 3                    | Date and version identifier                                                                                                                                                                                                                                                                                                                                                                                                                                                                                                                                                                                                                                                   |
| Funding<br>P 21, I 494-496                                      | 4                    | Sources and types of financial, material, and other support                                                                                                                                                                                                                                                                                                                                                                                                                                                                                                                                                                                                                   |
| Roles and responsibilities<br>A: P 1, I 5-11<br>B: P 1, I 15-20 | 5a<br>5b<br>5c<br>5d | Names, affiliations, and roles of protocol contributors<br>Name and contact information for the trial sponsor<br>Role of study sponsor and funders, if any, in study design; collection, management, analysis, and interpretation of data; writing of the report; and the decision to submit the report for publication, including whether they will have ultimate authority over any of these activities<br>Composition, roles, and responsibilities of the coordinating centre, steering committee, endpoint adjudication committee, data management team, and other individuals or groups overseeing the trial, if applicable (see Item 21a for data monitoring committee) |
| <b>Introduction</b>                                             |                      |                                                                                                                                                                                                                                                                                                                                                                                                                                                                                                                                                                                                                                                                               |
| Background and rationale<br>P 3, I 67-133<br>P 3, I 70-76       | 6a<br>6b             | Description of research question and justification for undertaking the trial, including summary of relevant studies (published and unpublished) examining benefits and harms for each intervention<br>Explanation for choice of comparators                                                                                                                                                                                                                                                                                                                                                                                                                                   |
| Objectives<br>P 5, I 129-136                                    | 7                    | Specific objectives or hypotheses                                                                                                                                                                                                                                                                                                                                                                                                                                                                                                                                                                                                                                             |
| Trial design<br>P6, I 140-145                                   | 8                    | Description of trial design including type of trial (eg, parallel group, crossover, factorial, single group), allocation ratio, and framework (eg, superiority, equivalence, noninferiority, exploratory)                                                                                                                                                                                                                                                                                                                                                                                                                                                                     |

## Methods: Participants, interventions, and outcomes

|                                                          |     |                                                                                                                                                                                                                                                                                                                                                                                |
|----------------------------------------------------------|-----|--------------------------------------------------------------------------------------------------------------------------------------------------------------------------------------------------------------------------------------------------------------------------------------------------------------------------------------------------------------------------------|
| Study setting<br>P6, I 148-149                           | 9   | Description of study settings (eg, community clinic, academic hospital) and list of countries where data will be collected. Reference to where list of study sites can be obtained                                                                                                                                                                                             |
| Eligibility criteria<br>P6, I 155-163                    | 10  | Inclusion and exclusion criteria for participants. If applicable, eligibility criteria for study centres and individuals who will perform the interventions (eg, surgeons, psychotherapists)                                                                                                                                                                                   |
| Interventions<br>A: p7, I 164-240<br><br>C: p12, 283-285 | 11a | Interventions for each group with sufficient detail to allow replication, including how and when they will be administered                                                                                                                                                                                                                                                     |
|                                                          | 11b | Criteria for discontinuing or modifying allocated interventions for a given trial participant (eg, drug dose change in response to harms, participant request, or improving/worsening disease)                                                                                                                                                                                 |
|                                                          | 11c | Strategies to improve adherence to intervention protocols, and any procedures for monitoring adherence (eg, drug tablet return, laboratory tests)                                                                                                                                                                                                                              |
|                                                          | 11d | Relevant concomitant care and interventions that are permitted or prohibited during the trial                                                                                                                                                                                                                                                                                  |
| Outcomes<br>P 10, I 245-384                              | 12  | Primary, secondary, and other outcomes, including the specific measurement variable (eg, systolic blood pressure), analysis metric (eg, change from baseline, final value, time to event), method of aggregation (eg, median, proportion), and time point for each outcome. Explanation of the clinical relevance of chosen efficacy and harm outcomes is strongly recommended |
| Participant<br>timeline                                  | 13  | Time schedule of enrolment, interventions (including any run-ins and washouts), assessments, and visits for participants. A schematic diagram is highly recommended (see Figure)                                                                                                                                                                                               |
| Table 1                                                  |     |                                                                                                                                                                                                                                                                                                                                                                                |
| Sample size<br>P 17, I 391-401                           | 14  | Estimated number of participants needed to achieve study objectives and how it was determined, including clinical and statistical assumptions supporting any sample size calculations                                                                                                                                                                                          |
| Recruitment<br>P 6, I 148-151                            | 15  | Strategies for achieving adequate participant enrolment to reach target sample size                                                                                                                                                                                                                                                                                            |

## Methods: Assignment of interventions (for controlled trials)

### Allocation:

|                                         |     |                                                                                                                                                                                                                                                                                                                                                          |
|-----------------------------------------|-----|----------------------------------------------------------------------------------------------------------------------------------------------------------------------------------------------------------------------------------------------------------------------------------------------------------------------------------------------------------|
| Sequence<br>generation<br>P8, I 196-201 | 16a | Method of generating the allocation sequence (eg, computer-generated random numbers), and list of any factors for stratification. To reduce predictability of a random sequence, details of any planned restriction (eg, blocking) should be provided in a separate document that is unavailable to those who enrol participants or assign interventions |
|-----------------------------------------|-----|----------------------------------------------------------------------------------------------------------------------------------------------------------------------------------------------------------------------------------------------------------------------------------------------------------------------------------------------------------|

|    |                |     |                                                                         |
|----|----------------|-----|-------------------------------------------------------------------------|
| 1  |                |     |                                                                         |
| 2  | Allocation     | 16b | Mechanism of implementing the allocation sequence (eg, central          |
| 3  | concealment    |     | telephone; sequentially numbered, opaque, sealed envelopes),            |
| 4  | mechanism      |     | describing any steps to conceal the sequence until interventions are    |
| 5  | P8, I 196-201  |     | assigned                                                                |
| 6  |                |     |                                                                         |
| 7  | Implementation | 16c | Who will generate the allocation sequence, who will enrol participants, |
| 8  | P8, I 196-201  |     | and who will assign participants to interventions                       |
| 9  |                |     |                                                                         |
| 10 | Blinding       | 17a | Who will be blinded after assignment to interventions (eg, trial        |
| 11 | (masking)      |     | participants, care providers, outcome assessors, data analysts), and    |
| 12 | P8, I 200      |     | how                                                                     |
| 13 |                | 17b | If blinded, circumstances under which unblinding is permissible, and    |
| 14 |                |     | procedure for revealing a participant's allocated intervention during   |
| 15 |                |     | the trial                                                               |
| 16 |                |     |                                                                         |
| 17 |                |     |                                                                         |
| 18 |                |     |                                                                         |

### Methods: Data collection, management, and analysis

|    |                 |     |                                                                          |
|----|-----------------|-----|--------------------------------------------------------------------------|
| 19 |                 |     |                                                                          |
| 20 | Data collection | 18a | Plans for assessment and collection of outcome, baseline, and other      |
| 21 | methods         |     | trial data, including any related processes to promote data quality (eg, |
| 22 | P 10, I 245-420 |     | duplicate measurements, training of assessors) and a description of      |
| 23 |                 |     | study instruments (eg, questionnaires, laboratory tests) along with      |
| 24 |                 |     | their reliability and validity, if known. Reference to where data        |
| 25 |                 |     | collection forms can be found, if not in the protocol                    |
| 26 |                 | 18b | Plans to promote participant retention and complete follow-up,           |
| 27 |                 |     | including list of any outcome data to be collected for participants who  |
| 28 |                 |     | discontinue or deviate from intervention protocols                       |
| 29 |                 |     |                                                                          |
| 30 | Data            | 19  | Plans for data entry, coding, security, and storage, including any       |
| 31 | management      |     | related processes to promote data quality (eg, double data entry;        |
| 32 |                 |     | range checks for data values). Reference to where details of data        |
| 33 |                 |     | management procedures can be found, if not in the protocol               |
| 34 |                 |     |                                                                          |
| 35 | Statistical     | 20a | Statistical methods for analysing primary and secondary outcomes.        |
| 36 | methods         |     | Reference to where other details of the statistical analysis plan can be |
| 37 | P 17, I 400-420 |     | found, if not in the protocol                                            |
| 38 |                 | 20b | Methods for any additional analyses (eg, subgroup and adjusted           |
| 39 |                 |     | analyses)                                                                |
| 40 | P 17, I 400-420 | 20c | Definition of analysis population relating to protocol non-adherence     |
| 41 |                 |     | (eg, as randomised analysis), and any statistical methods to handle      |
| 42 |                 |     | missing data (eg, multiple imputation)                                   |
| 43 |                 |     |                                                                          |
| 44 |                 |     |                                                                          |
| 45 |                 |     |                                                                          |
| 46 |                 |     |                                                                          |
| 47 |                 |     |                                                                          |
| 48 |                 |     |                                                                          |

### Methods: Monitoring

|    |                 |     |                                                                      |
|----|-----------------|-----|----------------------------------------------------------------------|
| 49 |                 |     |                                                                      |
| 50 | Data monitoring | 21a | Composition of data monitoring committee (DMC); summary of its role  |
| 51 |                 |     | and reporting structure; statement of whether it is independent from |
| 52 |                 |     | the sponsor and competing interests; and reference to where further  |
| 53 |                 |     | details about its charter can be found, if not in the protocol.      |
| 54 |                 |     | Alternatively, an explanation of why a DMC is not needed             |
| 55 |                 |     |                                                                      |
| 56 |                 |     |                                                                      |
| 57 |                 |     |                                                                      |
| 58 |                 |     |                                                                      |
| 59 |                 |     |                                                                      |
| 60 |                 |     |                                                                      |

|    |          |     |                                                                        |
|----|----------|-----|------------------------------------------------------------------------|
| 1  |          | 21b | Description of any interim analyses and stopping guidelines, including |
| 2  |          |     | who will have access to these interim results and make the final       |
| 3  |          |     | decision to terminate the trial                                        |
| 4  |          |     |                                                                        |
| 5  |          |     |                                                                        |
| 6  | Harms    | 22  | Plans for collecting, assessing, reporting, and managing solicited and |
| 7  |          |     | spontaneously reported adverse events and other unintended effects     |
| 8  |          |     | of trial interventions or trial conduct                                |
| 9  |          |     |                                                                        |
| 10 | Auditing | 23  | Frequency and procedures for auditing trial conduct, if any, and       |
| 11 |          |     | whether the process will be independent from investigators and the     |
| 12 |          |     | sponsor                                                                |
| 13 |          |     |                                                                        |
| 14 |          |     |                                                                        |

### Ethics and dissemination

|    |                   |     |                                                                          |
|----|-------------------|-----|--------------------------------------------------------------------------|
| 15 |                   |     |                                                                          |
| 16 |                   |     |                                                                          |
| 17 | Research ethics   | 24  | Plans for seeking research ethics committee/institutional review board   |
| 18 | approval          |     | (REC/IRB) approval                                                       |
| 19 | P 18, I 423-424   |     |                                                                          |
| 20 |                   |     |                                                                          |
| 21 |                   |     |                                                                          |
| 22 | Protocol          | 25  | Plans for communicating important protocol modifications (eg,            |
| 23 | amendments        |     | changes to eligibility criteria, outcomes, analyses) to relevant parties |
| 24 |                   |     | (eg, investigators, REC/IRBs, trial participants, trial registries,      |
| 25 |                   |     | journals, regulators)                                                    |
| 26 |                   |     |                                                                          |
| 27 | Consent or assent | 26a | Who will obtain informed consent or assent from potential trial          |
| 28 | P7, I 164-173     |     | participants or authorised surrogates, and how (see Item 32)             |
| 29 |                   |     |                                                                          |
| 30 |                   | 26b | Additional consent provisions for collection and use of participant data |
| 31 |                   |     | and biological specimens in ancillary studies, if applicable             |
| 32 |                   |     |                                                                          |
| 33 |                   |     |                                                                          |
| 34 | Confidentiality   | 27  | How personal information about potential and enrolled participants will  |
| 35 | P 11, I 265-275   |     | be collected, shared, and maintained in order to protect confidentiality |
| 36 |                   |     | before, during, and after the trial                                      |
| 37 |                   |     |                                                                          |
| 38 | Declaration of    | 28  | Financial and other competing interests for principal investigators for  |
| 39 | interests         |     | the overall trial and each study site                                    |
| 40 | P 22, I 514       |     |                                                                          |
| 41 |                   |     |                                                                          |
| 42 |                   |     |                                                                          |
| 43 | Access to data    | 29  | Statement of who will have access to the final trial dataset, and        |
| 44 |                   |     | disclosure of contractual agreements that limit such access for          |
| 45 |                   |     | investigators                                                            |
| 46 |                   |     |                                                                          |
| 47 | Ancillary and     | 30  | Provisions, if any, for ancillary and post-trial care, and for           |
| 48 | post-trial care   |     | compensation to those who suffer harm from trial participation           |
| 49 |                   |     |                                                                          |
| 50 | Dissemination     | 31a | Plans for investigators and sponsor to communicate trial results to      |
| 51 | policy            |     | participants, healthcare professionals, the public, and other relevant   |
| 52 | P 18, 442-444     |     | groups (eg, via publication, reporting in results databases, or other    |
| 53 |                   |     | data sharing arrangements), including any publication restrictions       |
| 54 |                   |     |                                                                          |
| 55 |                   |     |                                                                          |
| 56 | P 21, I 501-502   | 31b | Authorship eligibility guidelines and any intended use of professional   |
| 57 |                   |     | writers                                                                  |
| 58 |                   |     |                                                                          |
| 59 |                   |     |                                                                          |
| 60 |                   |     |                                                                          |

- 1  
2 31c Plans, if any, for granting public access to the full protocol, participant-  
3 level dataset, and statistical code  
4

## 5 **Appendices**

- 6 Informed consent 32 Model consent form and other related documentation given to  
7 materials participants and authorised surrogates  
8  
9 Biological 33 Plans for collection, laboratory evaluation, and storage of biological  
10 specimens specimens for genetic or molecular analysis in the current trial and for  
11 future use in ancillary studies, if applicable  
12  
13

---

14 \*It is strongly recommended that this checklist be read in conjunction with the SPIRIT 2013  
15 Explanation & Elaboration for important clarification on the items. Amendments to the  
16 protocol should be tracked and dated. The SPIRIT checklist is copyrighted by the SPIRIT  
17 Group under the Creative Commons "[Attribution-NonCommercial-NoDerivs 3.0 Unported](#)"  
18 license.  
19  
20  
21  
22  
23  
24  
25  
26  
27  
28  
29  
30  
31  
32  
33  
34  
35  
36  
37  
38  
39  
40  
41  
42  
43  
44  
45  
46  
47  
48  
49  
50  
51  
52  
53  
54  
55  
56  
57  
58  
59  
60
